# Supplementary material for: Severity of Omicron Subvariants and Vaccine Impact in Catalonia, Spain
Source: Vaccines (Basel). 2024 Apr 27;12(5):466. doi: 10.3390/vaccines12050466 (PMC11125683; doi:10.3390/vaccines12050466)
Supplement: Supplementary file 1 [file vaccines-12-00466-s001.zip › Suppl_Mat_Tables_Vaccines_DEF.xlsx]

## Sheet: Info
Table Number	Name and source	Description
Table S1	SIVIC variants	Weekly data extracted from SIVIC and adjusted taking into account the most dominant during the period studied in the article.
	source: SIVIC*
Table S2	Variant percentages	Percentages and dates of each SARS-CoV-2 variant in the viral landscape of Catalonia. No single variant reaches 100% dominance in any given week.
	source: deRioja
Table S3	60-69yo_ASPCAT	Daily data on cases, hospitalizations, and deaths (total and in-hospital) among persons aged 60-69 years in Catalonia, Spain. All statistical results calculated and used in the article are shown.
	source: ASPCAT** & de Rioja
Table S4	70-79yo_ASPCAT	Daily data on cases, hospitalizations, and deaths (total and in-hospital) among persons aged 70-79 years in Catalonia, Spain. All statistical results calculated and used in the article are shown.
	source: ASPCAT & de Rioja
Table S5	g.t.80yo_ASPCAT	Daily data on cases, hospitalizations, and deaths (total and in-hospital) among persons aged >80 years in Catalonia, Spain. All statistical results calculated and used in the article are shown.
	source: ASPCAT & de Rioja
Table S6	Average_daily_metrics	Average daily cases, new hospitalizations, and deaths (due to and due to + with COVID-19) for emergence and dominance periods per variant.
	source: ASPCAT & de Rioja
*SIVIC: Sistema d'Informació per a la Vigilància d'Infeccions a Catalunya
https://sivic.salut.gencat.cat/dades_obertes
*ASPCAT: Agència de Salut Pública de Catalunya

## Sheet: S1_SIVIC_Variants
Start of week	End of week	Delta (B.1.617.2)	Omicron (BA.1)	Omicron (BA.2)	Omicron (BA.4)	Omicron (BA.5)	Omicron (BQ.1)	Omicron (XBB.1)	Omicron (XBB.2)	Other	Omicron Other	TOTAL
2021-11-01	2021-11-07	405	0	0	0	0	0	0	0	1	0	406
2021-11-08	2021-11-14	525	0	0	0	0	0	0	0	2	0	527
2021-11-15	2021-11-21	676	0	0	0	0	0	0	0	10	0	686
2021-11-22	2021-11-28	729	0	0	0	0	0	0	0	1	1	731
2021-11-29	2021-12-05	793	8	0	0	0	0	0	0	2	5	808
2021-12-06	2021-12-12	584	13	0	0	0	0	0	0	2	8	607
2021-12-13	2021-12-19	514	253	0	0	0	0	0	0	3	14	784
2021-12-20	2021-12-26	340	497	0	0	0	0	0	0	15	24	876
2021-12-27	2022-01-02	133	589	0	0	0	0	0	0	6	2	730
2022-01-03	2022-01-09	104	666	0	0	0	0	0	0	2	1	773
2022-01-10	2022-01-16	46	823	1	0	0	0	0	0	0	0	870
2022-01-17	2022-01-23	18	692	12	0	0	0	0	0	3	0	725
2022-01-24	2022-01-30	32	744	29	0	0	0	0	0	2	0	807
2022-01-31	2022-02-06	10	652	41	0	0	0	0	0	2	1	706
2022-02-07	2022-02-13	8	452	52	0	0	0	0	0	0	0	512
2022-02-14	2022-02-20	4	464	82	0	0	0	0	0	0	2	552
2022-02-21	2022-02-27	0	310	123	0	0	0	0	0	1	0	434
2022-02-28	2022-03-06	1	207	179	0	0	0	0	0	4	0	391
2022-03-07	2022-03-13	3	124	235	0	0	0	0	0	9	0	371
2022-03-14	2022-03-20	1	103	358	0	0	0	0	0	2	0	464
2022-03-21	2022-03-27	0	44	243	0	0	0	0	0	2	1	290
2022-03-28	2022-04-03	2	45	282	0	0	0	0	0	4	1	334
2022-04-04	2022-04-10	0	23	312	0	0	0	0	0	2	1	338
2022-04-11	2022-04-17	1	8	324	0	0	0	0	0	0	0	333
2022-04-18	2022-04-24	0	9	347	0	1	0	0	0	6	2	365
2022-04-25	2022-05-01	1	9	364	2	3	0	0	0	5	0	384
2022-05-02	2022-05-08	0	7	428	3	6	0	0	0	11	1	456
2022-05-09	2022-05-15	0	6	416	11	24	0	0	0	5	2	464
2022-05-16	2022-05-22	1	2	422	6	42	0	0	0	7	1	481
2022-05-23	2022-05-29	1	2	397	21	67	0	0	0	5	0	493
2022-05-30	2022-06-05	0	1	332	13	125	0	0	0	24	0	495
2022-06-06	2022-06-12	0	2	271	15	178	0	0	0	6	0	472
2022-06-13	2022-06-19	0	2	178	14	272	0	0	0	3	0	469
2022-06-20	2022-06-26	0	0	115	22	302	0	0	0	0	1	440
2022-06-27	2022-07-03	1	0	106	34	388	0	0	0	2	4	535
2022-07-04	2022-07-10	0	2	64	20	321	0	0	0	1	0	408
2022-07-11	2022-07-17	0	0	68	19	342	0	0	0	0	0	429
2022-07-18	2022-07-24	1	1	34	27	361	0	0	0	2	1	427
2022-07-25	2022-07-31	0	0	19	22	271	0	0	0	0	0	312
2022-08-01	2022-08-07	0	0	38	15	295	0	0	0	1	1	350
2022-08-08	2022-08-14	0	0	20	12	212	0	0	0	0	0	244
2022-08-15	2022-08-21	0	0	17	7	137	0	0	0	0	0	161
2022-08-22	2022-08-28	0	0	21	9	151	0	0	0	5	0	186
2022-08-29	2022-09-04	0	0	12	16	135	0	0	0	2	0	165
2022-09-05	2022-09-11	0	0	11	23	99	0	0	0	1	0	134
2022-09-12	2022-09-18	0	0	11	17	103	1	0	0	0	0	132
2022-09-19	2022-09-25	0	0	15	14	112	6	0	0	1	1	149
2022-09-26	2022-10-02	0	0	23	5	102	12	0	0	0	0	142
2022-10-03	2022-10-09	0	0	27	4	137	43	0	0	0	0	211
2022-10-10	2022-10-16	0	0	41	6	84	50	1	0	0	0	182
2022-10-17	2022-10-23	0	0	39	2	85	84	1	0	0	0	211
2022-10-24	2022-10-30	0	0	36	4	73	96	0	0	0	0	209
2022-10-31	2022-11-06	0	0	23	3	49	120	1	0	1	0	197
2022-11-07	2022-11-13	0	0	20	1	48	195	0	1	0	0	265
2022-11-14	2022-11-20	1	0	31	2	48	259	3	0	1	0	345
2022-11-21	2022-11-27	0	0	20	2	35	218	1	0	1	0	277
2022-11-28	2022-12-04	0	0	15	0	34	202	2	3	3	5	264
2022-12-05	2022-12-11	0	0	14	1	15	158	5	0	1	5	199
2022-12-12	2022-12-18	0	1	13	2	6	176	2	0	1	4	205
2022-12-19	2022-12-25	0	0	13	0	6	172	2	3	1	6	203
2022-12-26	2023-01-01	0	0	13	0	1	96	0	0	1	2	113
2023-01-02	2023-01-08	0	0	16	0	7	114	0	1	3	5	146
2023-01-09	2023-01-15	0	0	14	0	4	117	23	0	0	5	163
2023-01-16	2023-01-22	0	0	7	0	3	85	15	2	1	4	117
2023-01-23	2023-01-29	0	0	8	0	1	95	9	0	0	2	115
2023-01-30	2023-02-05	0	0	6	0	1	76	39	1	1	1	125
2023-02-06	2023-02-12	0	0	16	0	2	73	89	2	0	0	182
2023-02-13	2023-02-19	0	0	4	0	1	49	61	1	1	2	119
2023-02-20	2023-02-26	0	0	8	0	1	39	54	2	0	0	104

## Sheet: S2_Variant_Percentages
Percentage (%)	BA.1	BA.2	BA.5	BQ.1
10	2021-12-10	2022-02-11	2022-05-17	2022-09-26
20	2021-12-14	2022-02-19	2022-05-29	2022-10-09
30	2021-12-17	2022-02-25	2022-06-06	2022-10-17
40	2021-12-20	2022-03-01	2022-06-12	2022-10-24
50	2021-12-22	2022-03-06	2022-06-19	2022-10-31
60	2021-12-24	2022-03-10	2022-06-25	2022-11-07
70	2021-12-27	2022-03-15	2022-07-02	2022-11-15
80	2021-12-30	2022-03-21	2022-07-12	2022-11-24
90	2022-01-05	2022-03-31	2022-08-01	2022-12-09
100	-	-	-	-

## Sheet: S3_60-69yo_ASPCAT
Date	Cases						Hospitalizations						Deaths (due to COVID-19)						Deaths in-hospital (due to COVID-19)						Deaths (due to + with COVID-19)						Deaths in-hospital (due to + with COVID-19)						∆Total Cases	∆Total Hosp	∆Total Deaths
	Total	1 - 90 days	91 - 180 days	181 - 270 days	+ 270 days	No vaccine	Total	1 - 90 days	91 - 180 days	181 - 270 days	+ 270 days	No vaccine	Total	1 - 90 days	91 - 180 days	181 - 270 days	+ 270 days	No vaccine	Total	1 - 90 days	91 - 180 days	181 - 270 days	+ 270 days	No vaccine	Total	1 - 90 days	91 - 180 days	181 - 270 days	+ 270 days	No vaccine	Total	1 - 90 days	91 - 180 days	181 - 270 days	+ 270 days	No vaccine
2021-12-05	14	1	9	3	0	1	0	0	0	0	0	0	0	0	0	0	0	0	0	0	0	0	0	0	0	0	0	0	0	0	0	0	0	0	0	0
2021-12-06	16	2	7	2	2	3	1	0	0	0	0	1	0	0	0	0	0	0	0	0	0	0	0	0	0	0	0	0	0	0	0	0	0	0	0	0	2	1	0
2021-12-07	36	2	27	3	2	2	1	0	1	0	0	0	0	0	0	0	0	0	0	0	0	0	0	0	0	0	0	0	0	0	0	0	0	0	0	0	20	0	0
2021-12-08	8	0	4	1	1	2	1	0	0	0	0	1	0	0	0	0	0	0	0	0	0	0	0	0	0	0	0	0	0	0	0	0	0	0	0	0	-28	0	0			CASES					Hosp
2021-12-09	28	9	14	2	0	3	1	0	1	0	0	0	0	0	0	0	0	0	0	0	0	0	0	0	0	0	0	0	0	0	0	0	0	0	0	0	20	0	0		variant	1-3 months	4-6 months	7-9 months	10+ months	No vaccine	1-3 months	4-6 months	7-9 months
2021-12-10	17	0	14	2	1	0	1	0	1	0	0	0	0	0	0	0	0	0	0	0	0	0	0	0	0	0	0	0	0	0	0	0	0	0	0	0	-11	0	0		BA.1	9517	2172	2514	280	1920	63	58	56
2021-12-11	15	1	10	2	0	2	1	0	0	0	0	1	0	0	0	0	0	0	0	0	0	0	0	0	0	0	0	0	0	0	0	0	0	0	0	0	-2	0	0		BA.2	4927	10455	1089	993	1056	36	116	28
2021-12-12	22	0	15	5	1	1	3	0	3	0	0	0	0	0	0	0	0	0	0	0	0	0	0	0	0	0	0	0	0	0	0	0	0	0	0	0	7	2	0		BA.5	283	7085	12265	2800	1305	18	96	238
2021-12-13	53	11	38	1	2	1	4	0	4	0	0	0	0	0	0	0	0	0	0	0	0	0	0	0	1	0	1	0	0	0	0	0	0	0	0	0	31	1	1		BQ.1	862	117	263	5666	433	59	18	24
2021-12-14	86	16	57	7	1	5	4	0	2	1	0	1	0	0	0	0	0	0	0	0	0	0	0	0	0	0	0	0	0	0	0	0	0	0	0	0	33	0	-1		Total	15589	19829	16131	9739	4714	176	288	346
2021-12-15	122	23	74	13	2	10	3	0	2	1	0	0	0	0	0	0	0	0	0	0	0	0	0	0	0	0	0	0	0	0	0	0	0	0	0	0	36	-1	0								% Hosp (n>n_min)
2021-12-16	234	57	125	28	6	18	6	1	1	2	0	2	0	0	0	0	0	0	0	0	0	0	0	0	0	0	0	0	0	0	0	0	0	0	0	0	112	3	0							variant	1-3 months	4-6 months	7-9 months
2021-12-17	245	68	134	22	5	16	6	1	4	0	0	1	0	0	0	0	0	0	0	0	0	0	0	0	1	0	0	1	0	0	0	0	0	0	0	0	11	0	1			p [%]	d [%]	n_min		BA.1	0.661973	2.67035	2.22753
2021-12-18	137	37	64	22	4	10	4	0	1	1	0	2	0	0	0	0	0	0	1	0	1	0	0	0	0	0	0	0	0	0	1	0	1	0	0	0	-108	-2	0		Hospitalizations	2.14387	1.07194	701		BA.2	0.730668	1.10952	2.57117
2021-12-19	128	37	50	27	2	12	3	1	0	0	0	2	0	0	0	0	0	0	0	0	0	0	0	0	0	0	0	0	0	0	0	0	0	0	0	0	-9	-1	-1		Deaths	0.0924214	0.0462107	16611		BA.5	6.36042	1.35498	1.94048
2021-12-20	295	103	103	62	4	23	1	0	0	0	0	1	1	0	0	1	0	0	0	0	0	0	0	0	1	0	0	1	0	0	0	0	0	0	0	0	167	-2	1		Deaths in-hosp	1.69611	0.848057	891		BQ.1	6.84455	15.3846	9.12548
2021-12-21	255	106	81	48	8	12	8	2	2	2	0	2	0	0	0	0	0	0	1	1	0	0	0	0	0	0	0	0	0	0	1	1	0	0	0	0	-40	7	0								1.129	1.45242	2.14494
2021-12-22	268	117	84	46	0	21	7	2	2	3	0	0	0	0	0	0	0	0	0	0	0	0	0	0	0	0	0	0	0	0	1	1	0	0	0	0	13	-1	0								% Hosp (n>n_min) Upper B
2021-12-23	187	87	41	38	3	18	4	1	1	1	0	1	0	0	0	0	0	0	0	0	0	0	0	0	0	0	0	0	0	0	0	0	0	0	0	0	-81	-3	-1								1-3 months	4-6 months	7-9 months
2021-12-24	182	84	53	20	4	21	5	3	1	0	0	1	0	0	0	0	0	0	0	0	0	0	0	0	0	0	0	0	0	0	0	0	0	0	0	0	-5	1	0								0.846167	3.4385	2.88298
2021-12-25	72	36	10	16	3	7	5	2	0	1	1	1	0	0	0	0	0	0	0	0	0	0	0	0	0	0	0	0	0	0	0	0	0	0	0	0	-110	0	0								1.01013	1.32928	3.69473
2021-12-26	90	39	22	15	1	13	8	1	3	0	0	4	0	0	0	0	0	0	0	0	0	0	0	0	0	0	0	0	0	0	0	0	0	0	0	0	18	3	0								9.86614	1.65217	2.2004
2021-12-27	368	172	84	69	9	34	4	1	1	1	0	1	1	0	0	0	0	1	0	0	0	0	0	0	1	0	0	0	0	1	0	0	0	0	0	0	278	-4	1								8.74047	23.2203	13.2735
2021-12-28	300	128	74	43	8	47	4	0	1	1	0	2	0	0	0	0	0	0	0	0	0	0	0	0	0	0	0	0	0	0	0	0	0	0	0	0	-68	0	-1								1.3075	1.62877	2.38043
2021-12-29	252	124	51	30	4	43	7	1	1	1	0	4	0	0	0	0	0	0	0	0	0	0	0	0	0	0	0	0	0	0	0	0	0	0	0	0	-48	3	0								% Hosp (n>n_min) Lower B
2021-12-30	235	105	46	32	4	48	5	0	1	1	1	2	0	0	0	0	0	0	0	0	0	0	0	0	0	0	0	0	0	0	0	0	0	0	0	0	-17	-2	0								1-3 months	4-6 months	7-9 months
2021-12-31	183	98	32	19	5	29	8	0	2	2	0	4	0	0	0	0	0	0	0	0	0	0	0	0	0	0	0	0	0	0	0	0	0	0	0	0	-52	3	0								0.509042	2.03381	1.68693
2022-01-01	244	123	37	45	8	31	4	0	1	0	0	3	0	0	0	0	0	0	0	0	0	0	0	0	1	0	0	1	0	0	0	0	0	0	0	0	61	-4	1								0.51226	0.917658	1.71517
2022-01-02	173	77	39	33	4	20	3	0	2	0	0	1	0	0	0	0	0	0	0	0	0	0	0	0	0	0	0	0	0	0	0	0	0	0	0	0	-71	-1	-1								3.81281	1.09888	1.70374
2022-01-03	422	194	80	92	8	48	5	0	3	0	0	2	0	0	0	0	0	0	0	0	0	0	0	0	0	0	0	0	0	0	0	0	0	0	0	0	249	2	0								5.25087	9.38026	5.93457
2022-01-04	340	162	53	68	5	52	5	0	3	1	0	1	0	0	0	0	0	0	0	0	0	0	0	0	0	0	0	0	0	0	0	0	0	0	0	0	-82	0	0								0.969111	1.29052	1.92693
2022-01-05	262	133	29	49	6	45	4	2	0	0	0	2	0	0	0	0	0	0	0	0	0	0	0	0	0	0	0	0	0	0	0	0	0	0	0	0	-78	-1	0
2022-01-06	206	105	22	44	4	31	4	1	0	3	0	0	0	0	0	0	0	0	0	0	0	0	0	0	0	0	0	0	0	0	0	0	0	0	0	0	-56	0	0								1-3 months	4-6 months	7-9 months
2022-01-07	268	147	40	45	5	31	4	3	0	0	0	1	0	0	0	0	0	0	0	0	0	0	0	0	0	0	0	0	0	0	0	0	0	0	0	0	62	0	0						BA.1	1-3 months
2022-01-08	244	126	30	45	3	40	3	3	0	0	0	0	0	0	0	0	0	0	0	0	0	0	0	0	0	0	0	0	0	0	0	0	0	0	0	0	-24	-1	0							4-6 months	1e-13
2022-01-09	251	119	33	69	3	27	4	1	1	0	1	1	0	0	0	0	0	0	0	0	0	0	0	0	0	0	0	0	0	0	0	0	0	0	0	0	7	1	0							7-9 months	1e-10	0.3426
2022-01-10	258	140	21	52	6	39	5	2	0	0	1	2	0	0	0	0	0	0	0	0	0	0	0	0	0	0	0	0	0	0	0	0	0	0	0	0	7	1	0							10+ months	1e-06	0.2463	0.0953
2022-01-11	231	115	20	60	8	28	3	0	0	1	0	2	0	0	0	0	0	0	0	0	0	0	0	0	0	0	0	0	0	0	0	0	0	0	0	0	-27	-2	0							No vaccine	1e-33	0.0001	1e-06
2022-01-12	308	185	37	64	3	19	7	0	0	6	0	1	0	0	0	0	0	0	0	0	0	0	0	0	0	0	0	0	0	0	0	0	0	0	0	0	77	4	0						BA.2	1-3 months
2022-01-13	288	172	25	52	6	33	3	1	1	0	0	1	0	0	0	0	0	0	0	0	0	0	0	0	0	0	0	0	0	0	0	0	0	0	0	0	-20	-4	0							4-6 months	0.0287
2022-01-14	252	139	17	46	4	46	8	0	2	1	0	5	0	0	0	0	0	0	0	0	0	0	0	0	0	0	0	0	0	0	0	0	0	0	0	0	-36	5	0							7-9 months	1e-06	0.0001
2022-01-15	297	196	18	44	2	37	5	3	0	0	1	1	0	0	0	0	0	0	0	0	0	0	0	0	0	0	0	0	0	0	0	0	0	0	0	0	45	-3	0							10+ months	1e-10	1e-08	0.2489
2022-01-16	233	152	14	34	1	32	2	1	0	0	0	1	0	0	0	0	0	0	0	0	0	0	0	0	0	0	0	0	0	0	0	0	0	0	0	0	-64	-3	0							No vaccine	1e-08	1e-06	0.6924
2022-01-17	370	227	31	64	9	39	3	0	1	0	0	2	0	0	0	0	0	0	0	0	0	0	0	0	0	0	0	0	0	0	0	0	0	0	0	0	137	1	0						BA.5	1-3 months
2022-01-18	291	181	19	51	4	36	1	1	0	0	0	0	0	0	0	0	0	0	0	0	0	0	0	0	0	0	0	0	0	0	0	0	0	0	0	0	-79	-2	0							4-6 months	1e-07
2022-01-19	270	174	11	44	6	35	5	3	1	0	0	1	0	0	0	0	0	0	0	0	0	0	0	0	0	0	0	0	0	0	0	0	0	0	0	0	-21	4	0							7-9 months	1e-05	0.0024
2022-01-20	286	193	16	38	3	36	2	1	0	0	0	1	0	0	0	0	0	0	0	0	0	0	0	0	0	0	0	0	0	0	0	0	0	0	0	0	16	-3	0							10+ months	0.0168	1e-09	1e-05
2022-01-21	222	131	13	42	3	33	2	1	0	0	0	1	0	0	0	0	0	0	0	0	0	0	0	0	0	0	0	0	0	0	0	0	0	0	0	0	-64	0	0							No vaccine	0.0287	1e-07	0.0001
2022-01-22	232	152	10	34	3	33	4	3	0	0	1	0	0	0	0	0	0	0	0	0	0	0	0	0	0	0	0	0	0	0	0	0	0	0	0	0	10	2	0						BQ.1	1-3 months
2022-01-23	224	158	13	28	1	24	2	0	0	2	0	0	0	0	0	0	0	0	0	0	0	0	0	0	0	0	0	0	0	0	0	0	0	0	0	0	-8	-2	0							4-6 months	0.0029
2022-01-24	292	191	12	48	4	37	1	1	0	0	0	0	0	0	0	0	0	0	0	0	0	0	0	0	0	0	0	0	0	0	0	0	0	0	0	0	68	-1	0							7-9 months	0.2257	0.0784
2022-01-25	275	176	15	46	3	35	3	1	0	2	0	0	0	0	0	0	0	0	1	0	0	1	0	0	0	0	0	0	0	0	1	0	0	1	0	0	-17	2	1							10+ months	0.0048	1e-06	0.0016
2022-01-26	339	226	15	53	5	40	3	2	0	0	1	0	0	0	0	0	0	0	0	0	0	0	0	0	0	0	0	0	0	0	0	0	0	0	0	0	64	0	-1							No vaccine	0.0788	0.0941	0.894
2022-01-27	346	235	8	50	9	44	5	2	0	1	0	2	0	0	0	0	0	0	0	0	0	0	0	0	1	0	0	0	0	1	0	0	0	0	0	0	7	2	1						Total	1-3 months
2022-01-28	364	255	21	49	2	37	5	0	0	2	0	3	0	0	0	0	0	0	1	0	0	0	0	1	1	0	0	0	0	1	1	0	0	0	0	1	18	0	1							4-6 months	0.0083
2022-01-29	256	171	6	41	8	30	6	1	1	1	0	3	0	0	0	0	0	0	1	0	0	0	0	1	0	0	0	0	0	0	2	1	0	0	0	1	-108	1	0							7-9 months	1e-13	1e-07
2022-01-30	222	151	10	27	3	31	5	1	0	2	0	2	0	0	0	0	0	0	0	0	0	0	0	0	0	0	0	0	0	0	0	0	0	0	0	0	-34	-1	-2							10+ months	1e-51	1e-41	1e-18
2022-01-31	354	231	18	44	3	58	4	0	0	1	1	2	1	1	0	0	0	0	0	0	0	0	0	0	1	1	0	0	0	0	0	0	0	0	0	0	132	-1	1							No vaccine	1e-40	1e-32	1e-16
2022-02-01	358	246	12	48	5	47	6	3	0	1	1	1	0	0	0	0	0	0	0	0	0	0	0	0	0	0	0	0	0	0	0	0	0	0	0	0	4	2	-1
2022-02-02	373	268	17	37	3	48	3	0	1	1	0	1	0	0	0	0	0	0	0	0	0	0	0	0	0	0	0	0	0	0	0	0	0	0	0	0	15	-3	0								1-3 months	4-6 months	7-9 months
2022-02-03	312	222	16	34	6	34	3	0	0	1	1	1	0	0	0	0	0	0	0	0	0	0	0	0	0	0	0	0	0	0	0	0	0	0	0	0	-61	0	0						BA.1	1-RR	86.1849	44.271	53.5125
2022-02-04	338	250	14	28	4	42	3	0	1	0	0	2	0	0	0	0	0	0	0	0	0	0	0	0	0	0	0	0	0	0	0	0	0	0	0	0	26	0	0							err pos (1-RR)	4.89789	20.1719	17.0713
2022-02-05	236	182	7	24	3	20	2	0	0	1	0	1	0	0	0	0	0	0	0	0	0	0	0	0	0	0	0	0	0	0	0	0	0	0	0	0	-102	-1	0							err neg (1-RR)	4.13471	16.9973	14.336
2022-02-06	242	176	10	34	5	17	11	4	2	4	0	1	0	0	0	0	0	0	0	0	0	0	0	0	0	0	0	0	0	0	0	0	0	0	0	0	6	9	0
2022-02-07	344	256	10	41	6	31	7	2	0	2	0	3	0	0	0	0	0	0	0	0	0	0	0	0	0	0	0	0	0	0	0	0	0	0	0	0	102	-4	0						BA.2	1-RR	75.1102	62.2048	12.4145
2022-02-08	347	241	18	43	6	39	3	1	1	0	0	1	0	0	0	0	0	0	0	0	0	0	0	0	0	0	0	0	0	0	0	0	0	0	0	0	3	-4	0							err pos (1-RR)	13.9678	17.232	52.5218
2022-02-09	326	234	17	44	6	25	5	2	0	2	0	1	1	1	0	0	0	0	0	0	0	0	0	0	1	1	0	0	0	0	0	0	0	0	0	0	-21	2	1							err neg (1-RR)	10.8563	13.669	40.3021
2022-02-10	292	202	15	29	6	40	9	0	2	1	1	5	1	0	1	0	0	0	1	0	0	0	0	1	1	0	1	0	0	0	1	0	0	0	0	1	-34	4	1
2022-02-11	270	193	15	26	5	31	0	0	0	0	0	0	0	0	0	0	0	0	0	0	0	0	0	0	0	0	0	0	0	0	0	0	0	0	0	0	-22	-9	-2						BA.5	1-RR	-84.4523	60.7057	43.726
2022-02-12	159	120	12	13	0	14	0	0	0	0	0	0	0	0	0	0	0	0	0	0	0	0	0	0	0	0	0	0	0	0	0	0	0	0	0	0	-111	0	0							err pos (1-RR)	118.518	15.5781	20.0546
2022-02-13	154	121	4	16	1	12	4	1	2	0	0	1	0	0	0	0	0	0	0	0	0	0	0	0	0	0	0	0	0	0	1	0	1	0	0	0	-5	4	1							err neg (1-RR)	88.835	12.8681	16.5416
2022-02-14	286	220	10	29	5	22	3	0	0	2	0	1	0	0	0	0	0	0	0	0	0	0	0	0	0	0	0	0	0	0	0	0	0	0	0	0	132	-1	-1
2022-02-15	207	140	7	35	2	23	2	2	0	0	0	0	0	0	0	0	0	0	0	0	0	0	0	0	0	0	0	0	0	0	0	0	0	0	0	0	-79	-1	0						BQ.1	1-RR	29.436	-58.6081	5.9207
2022-02-16	230	168	4	28	3	27	0	0	0	0	0	0	0	0	0	0	0	0	0	0	0	0	0	0	0	0	0	0	0	0	0	0	0	0	0	0	23	-2	0							err pos (1-RR)	30.3138	96.1157	52.7553
2022-02-17	231	174	13	28	2	14	3	1	1	1	0	0	0	0	0	0	0	0	0	0	0	0	0	0	0	0	0	0	0	0	0	0	0	0	0	0	1	3	0							err neg (1-RR)	25.1606	75.2753	41.5648
2022-02-18	229	185	6	23	3	12	1	1	0	0	0	0	0	0	0	0	0	0	0	0	0	0	0	0	0	0	0	0	0	0	0	0	0	0	0	0	-2	-2	0
2022-02-19	156	121	5	17	2	11	1	1	0	0	0	0	0	0	0	0	0	0	0	0	0	0	0	0	0	0	0	0	0	0	0	0	0	0	0	0	-73	0	0						Total	1-RR	74.6566	67.3967	51.8512
2022-02-20	147	119	1	11	2	14	0	0	0	0	0	0	0	0	0	0	0	0	0	0	0	0	0	0	0	0	0	0	0	0	0	0	0	0	0	0	-9	-1	0							err pos (1-RR)	5.36983	6.0681	8.60669
2022-02-21	240	186	13	24	3	14	6	0	0	3	2	1	0	0	0	0	0	0	0	0	0	0	0	0	0	0	0	0	0	0	0	0	0	0	0	0	93	6	0							err neg (1-RR)	5.36983	6.0681	8.60669
2022-02-22	218	150	14	30	9	15	6	2	0	2	1	1	0	0	0	0	0	0	0	0	0	0	0	0	0	0	0	0	0	0	0	0	0	0	0	0	-22	0	0
2022-02-23	226	177	7	27	2	13	3	1	1	1	0	0	0	0	0	0	0	0	0	0	0	0	0	0	0	0	0	0	0	0	0	0	0	0	0	0	8	-3	0
2022-02-24	201	154	6	26	5	10	6	2	1	2	0	1	0	0	0	0	0	0	0	0	0	0	0	0	0	0	0	0	0	0	0	0	0	0	0	0	-25	3	0							Average numbers
2022-02-25	236	185	11	19	3	18	2	1	0	1	0	0	0	0	0	0	0	0	0	0	0	0	0	0	0	0	0	0	0	0	0	0	0	0	0	0	35	-4	0							Cases	Hosp	Deaths (due to + with)	in-Hosp Deaths (due to + with)
2022-02-26	148	117	4	20	2	5	0	0	0	0	0	0	0	0	0	0	0	0	0	0	0	0	0	0	0	0	0	0	0	0	0	0	0	0	0	0	-88	-2	0						BA.1 emerg	192.111	4.51852	0.296296	0.111111
2022-02-27	133	108	2	9	4	10	1	0	0	0	0	1	0	0	0	0	0	0	0	0	0	0	0	0	0	0	0	0	0	0	0	0	0	0	0	0	-15	1	0						BA.1 dom	287.286	4.05714	0.228571	0.114286
2022-02-28	213	170	12	13	5	13	5	1	4	0	0	0	0	0	0	0	0	0	0	0	0	0	0	0	0	0	0	0	0	0	0	0	0	0	0	0	80	4	0						BA.2 emerg	203.367	2.65	0.183673	0.0816327
2022-03-01	198	138	5	32	10	13	4	1	2	1	0	0	0	0	0	0	0	0	0	0	0	0	0	0	0	0	0	0	0	0	0	0	0	0	0	0	-15	-1	0						BA.2 dom	201.848	2.61702	0.173913	0.0434783
2022-03-02	185	147	6	16	3	13	5	4	0	0	1	0	0	0	0	0	0	0	0	0	0	0	0	0	0	0	0	0	0	0	0	0	0	0	0	0	-13	1	0						BA.5 emerg	277.359	5.12821	0.25641	0.0769231
2022-03-03	236	175	17	24	9	11	4	2	1	1	0	0	0	0	0	0	0	0	0	0	0	0	0	0	0	0	0	0	0	0	0	0	0	0	0	0	51	-1	0						BA.5 dom	46.0909	1.69091	0.0545455	0.0545455
2022-03-04	198	148	16	17	4	13	1	1	0	0	0	0	0	0	0	0	0	0	0	0	0	0	0	0	0	0	0	0	0	0	0	0	0	0	0	0	-38	-3	0						BQ.1 emerg	77.44	3.26667	0.0533333	0.0266667
2022-03-05	100	80	7	6	4	3	1	1	0	0	0	0	0	0	0	0	0	0	0	0	0	0	0	0	0	0	0	0	0	0	0	0	0	0	0	0	-98	0	0						BQ.1 dom	31.9375	3.22917	0.0208333	0
2022-03-06	130	88	21	11	4	6	3	1	1	0	1	0	0	0	0	0	0	0	0	0	0	0	0	0	0	0	0	0	0	0	0	0	0	0	0	0	30	2	0								∆Total Cases	∆Total Hosp	∆Total Deaths
2022-03-07	244	163	37	24	7	13	4	2	1	1	0	0	0	0	0	0	0	0	0	0	0	0	0	0	0	0	0	0	0	0	0	0	0	0	0	0	114	1	0
2022-03-08	216	135	37	22	5	17	2	0	1	1	0	0	0	0	0	0	0	0	0	0	0	0	0	0	0	0	0	0	0	0	0	0	0	0	0	0	-28	-2	0							BA.1 emerg	8.66667	0.111111	0
2022-03-09	235	151	52	17	3	12	0	0	0	0	0	0	0	0	0	0	0	0	0	0	0	0	0	0	1	0	1	0	0	0	0	0	0	0	0	0	19	-2	1							BA.1 dom	1.82857	0.0285714	0.0285714
2022-03-10	247	154	52	21	7	13	2	2	0	0	0	0	0	0	0	0	0	0	0	0	0	0	0	0	1	1	0	0	0	0	0	0	0	0	0	0	12	2	0							BA.2 emerg	-3.08163	-0.0666667	-0.0204082
2022-03-11	243	129	62	29	5	18	1	0	0	0	0	1	0	0	0	0	0	0	1	0	0	0	0	1	0	0	0	0	0	0	1	0	0	0	0	1	-4	-1	0							BA.2 dom	-0.521739	0	0
2022-03-12	129	73	37	10	3	6	0	0	0	0	0	0	0	0	0	0	0	0	0	0	0	0	0	0	0	0	0	0	0	0	0	0	0	0	0	0	-114	-1	-1							BA.5 emerg	-0.166667	0.1	0.0128205
2022-03-13	140	77	46	8	2	7	3	0	3	0	0	0	0	0	0	0	0	0	0	0	0	0	0	0	0	0	0	0	0	0	0	0	0	0	0	0	11	3	0							BA.5 dom	-2.14545	-0.0181818	-0.0181818
2022-03-14	265	121	94	30	6	14	4	2	1	1	0	0	1	1	0	0	0	0	0	0	0	0	0	0	1	1	0	0	0	0	0	0	0	0	0	0	125	1	1							BQ.1 emerg	1.13333	0.04	0
2022-03-15	264	117	100	19	7	21	5	2	2	0	0	1	1	0	0	0	0	1	0	0	0	0	0	0	1	0	0	0	0	1	0	0	0	0	0	0	-1	1	0							BQ.1 dom	-1.9375	-0.0625	0
2022-03-16	286	111	141	14	8	12	1	0	1	0	0	0	0	0	0	0	0	0	0	0	0	0	0	0	0	0	0	0	0	0	0	0	0	0	0	0	22	-4	-1
2022-03-17	291	96	154	21	4	16	3	1	1	1	0	0	0	0	0	0	0	0	0	0	0	0	0	0	0	0	0	0	0	0	1	1	0	0	0	0	5	2	1
2022-03-18	257	69	149	25	6	8	4	0	1	1	0	2	0	0	0	0	0	0	0	0	0	0	0	0	0	0	0	0	0	0	0	0	0	0	0	0	-34	1	-1
2022-03-19	124	37	64	9	3	11	1	1	0	0	0	0	0	0	0	0	0	0	0	0	0	0	0	0	0	0	0	0	0	0	0	0	0	0	0	0	-133	-3	0
2022-03-20	137	31	88	6	5	7	1	0	0	0	0	1	0	0	0	0	0	0	0	0	0	0	0	0	0	0	0	0	0	0	0	0	0	0	0	0	13	0	0
2022-03-21	276	65	155	27	11	18	1	0	1	0	0	0	0	0	0	0	0	0	0	0	0	0	0	0	0	0	0	0	0	0	0	0	0	0	0	0	139	0	0
2022-03-22	248	42	165	17	13	11	3	0	2	0	0	1	0	0	0	0	0	0	0	0	0	0	0	0	0	0	0	0	0	0	0	0	0	0	0	0	-28	2	0
2022-03-23	233	28	168	15	8	14	1	0	0	1	0	0	0	0	0	0	0	0	0	0	0	0	0	0	0	0	0	0	0	0	0	0	0	0	0	0	-15	-2	0
2022-03-24	203	33	141	13	5	11	1	0	0	0	0	1	0	0	0	0	0	0	0	0	0	0	0	0	0	0	0	0	0	0	0	0	0	0	0	0	-30	0	0
2022-03-25	209	38	144	11	5	11	2	0	1	0	1	0	0	0	0	0	0	0	0	0	0	0	0	0	0	0	0	0	0	0	0	0	0	0	0	0	6	1	0
2022-03-26	105	11	87	1	3	3	1	0	0	0	0	1	0	0	0	0	0	0	0	0	0	0	0	0	0	0	0	0	0	0	0	0	0	0	0	0	-104	-1	0
2022-03-27	81	8	67	0	4	2	0	0	0	0	0	0	0	0	0	0	0	0	0	0	0	0	0	0	0	0	0	0	0	0	0	0	0	0	0	0	-24	-1	0
2022-03-28	196	20	146	9	12	9	0	0	0	0	0	0	0	0	0	0	0	0	0	0	0	0	0	0	0	0	0	0	0	0	0	0	0	0	0	0	115	0	0
2022-03-29	138	18	96	9	7	8	3	0	2	0	1	0	0	0	0	0	0	0	0	0	0	0	0	0	0	0	0	0	0	0	0	0	0	0	0	0	-58	3	0
2022-03-30	175	16	125	8	13	13	3	0	1	0	0	2	0	0	0	0	0	0	0	0	0	0	0	0	0	0	0	0	0	0	0	0	0	0	0	0	37	0	0
2022-03-31	142	15	103	7	6	11	0	0	0	0	0	0	0	0	0	0	0	0	0	0	0	0	0	0	0	0	0	0	0	0	0	0	0	0	0	0	-33	-3	0
2022-04-01	121	11	85	8	7	10	4	0	3	1	0	0	0	0	0	0	0	0	0	0	0	0	0	0	0	0	0	0	0	0	0	0	0	0	0	0	-21	4	0
2022-04-02	92	5	72	4	6	5	2	0	0	0	1	1	0	0	0	0	0	0	0	0	0	0	0	0	0	0	0	0	0	0	0	0	0	0	0	0	-29	-2	0
2022-04-03	67	1	48	8	5	5	0	0	0	0	0	0	0	0	0	0	0	0	0	0	0	0	0	0	0	0	0	0	0	0	0	0	0	0	0	0	-25	-2	0
2022-04-04	183	13	144	11	8	7	3	1	2	0	0	0	0	0	0	0	0	0	0	0	0	0	0	0	0	0	0	0	0	0	0	0	0	0	0	0	116	3	0
2022-04-05	163	13	124	6	10	10	3	0	1	1	1	0	0	0	0	0	0	0	0	0	0	0	0	0	0	0	0	0	0	0	0	0	0	0	0	0	-20	0	0
2022-04-06	219	18	168	6	10	17	2	1	0	0	0	1	0	0	0	0	0	0	0	0	0	0	0	0	0	0	0	0	0	0	0	0	0	0	0	0	56	-1	0
2022-04-07	176	12	137	4	13	10	3	0	3	0	0	0	0	0	0	0	0	0	0	0	0	0	0	0	0	0	0	0	0	0	0	0	0	0	0	0	-43	1	0
2022-04-08	172	11	143	5	6	7	2	1	0	1	0	0	0	0	0	0	0	0	0	0	0	0	0	0	0	0	0	0	0	0	0	0	0	0	0	0	-4	-1	0
2022-04-09	90	3	65	8	9	5	2	0	1	0	1	0	0	0	0	0	0	0	0	0	0	0	0	0	1	0	0	0	1	0	0	0	0	0	0	0	-82	0	1
2022-04-10	82	5	66	2	6	3	2	0	2	0	0	0	0	0	0	0	0	0	0	0	0	0	0	0	0	0	0	0	0	0	0	0	0	0	0	0	-8	0	-1
2022-04-11	245	14	194	8	17	12	4	0	4	0	0	0	0	0	0	0	0	0	0	0	0	0	0	0	0	0	0	0	0	0	0	0	0	0	0	0	163	2	0
2022-04-12	212	6	160	7	17	22	4	0	1	0	0	3	0	0	0	0	0	0	0	0	0	0	0	0	1	0	1	0	0	0	0	0	0	0	0	0	-33	0	1
2022-04-13	202	10	153	7	17	15	3	0	0	0	3	0	0	0	0	0	0	0	0	0	0	0	0	0	0	0	0	0	0	0	0	0	0	0	0	0	-10	-1	-1
2022-04-14	171	10	130	12	13	6	4	0	1	2	1	0	0	0	0	0	0	0	0	0	0	0	0	0	0	0	0	0	0	0	0	0	0	0	0	0	-31	1	0
2022-04-15	74	2	57	1	8	6	4	0	3	0	0	1	0	0	0	0	0	0	0	0	0	0	0	0	0	0	0	0	0	0	0	0	0	0	0	0	-97	0	0
2022-04-16	89	1	71	5	4	8	4	0	3	1	0	0	0	0	0	0	0	0	0	0	0	0	0	0	0	0	0	0	0	0	0	0	0	0	0	0	15	0	0
2022-04-17	78	4	61	2	5	6	0	0	0	0	0	0	0	0	0	0	0	0	0	0	0	0	0	0	1	1	0	0	0	0	0	0	0	0	0	0	-11	-4	1
2022-04-18	119	4	91	8	9	7	4	0	2	0	1	1	0	0	0	0	0	0	0	0	0	0	0	0	0	0	0	0	0	0	0	0	0	0	0	0	41	4	-1
2022-04-19	313	3	247	11	31	21	3	1	0	0	1	1	0	0	0	0	0	0	0	0	0	0	0	0	0	0	0	0	0	0	1	0	0	0	0	1	194	-1	1
2022-04-20	225	11	173	9	24	8	2	0	1	0	0	1	0	0	0	0	0	0	0	0	0	0	0	0	1	0	1	0	0	0	0	0	0	0	0	0	-88	-1	0
2022-04-21	222	2	189	6	15	10	2	0	2	0	0	0	0	0	0	0	0	0	0	0	0	0	0	0	0	0	0	0	0	0	0	0	0	0	0	0	-3	0	-1
2022-04-22	246	5	211	4	14	12	10	0	8	0	1	1	0	0	0	0	0	0	0	0	0	0	0	0	0	0	0	0	0	0	0	0	0	0	0	0	24	8	0
2022-04-23	103	1	83	3	11	5	1	0	1	0	0	0	0	0	0	0	0	0	0	0	0	0	0	0	0	0	0	0	0	0	0	0	0	0	0	0	-143	-9	0
2022-04-24	94	5	74	0	10	5	1	0	1	0	0	0	0	0	0	0	0	0	0	0	0	0	0	0	0	0	0	0	0	0	0	0	0	0	0	0	-9	0	0
2022-04-25	309	5	254	9	24	17	1	0	0	0	1	0	0	0	0	0	0	0	0	0	0	0	0	0	0	0	0	0	0	0	0	0	0	0	0	0	215	0	0
2022-04-26	242	0	193	13	21	15	4	0	3	1	0	0	0	0	0	0	0	0	0	0	0	0	0	0	0	0	0	0	0	0	1	0	1	0	0	0	-67	3	1
2022-04-27	237	3	204	7	15	8	7	0	3	0	3	1	0	0	0	0	0	0	0	0	0	0	0	0	0	0	0	0	0	0	0	0	0	0	0	0	-5	3	-1
2022-04-28	222	5	178	6	21	12	4	0	4	0	0	0	0	0	0	0	0	0	0	0	0	0	0	0	0	0	0	0	0	0	0	0	0	0	0	0	-15	-3	0
2022-04-29	241	3	203	4	19	12	4	0	3	0	1	0	0	0	0	0	0	0	0	0	0	0	0	0	0	0	0	0	0	0	0	0	0	0	0	0	19	0	0
2022-04-30	145	1	118	6	13	7	1	0	1	0	0	0	0	0	0	0	0	0	0	0	0	0	0	0	0	0	0	0	0	0	0	0	0	0	0	0	-96	-3	0
2022-05-01	128	1	111	3	10	3	4	0	3	0	1	0	0	0	0	0	0	0	0	0	0	0	0	0	0	0	0	0	0	0	0	0	0	0	0	0	-17	3	0
2022-05-02	395	5	331	7	31	21	4	0	4	0	0	0	0	0	0	0	0	0	0	0	0	0	0	0	0	0	0	0	0	0	0	0	0	0	0	0	267	0	0
2022-05-03	297	3	246	8	28	12	2	0	0	0	1	1	0	0	0	0	0	0	0	0	0	0	0	0	0	0	0	0	0	0	0	0	0	0	0	0	-98	-2	0
2022-05-04	339	5	273	6	35	20	3	0	2	0	1	0	0	0	0	0	0	0	0	0	0	0	0	0	0	0	0	0	0	0	0	0	0	0	0	0	42	1	0
2022-05-05	284	2	241	6	27	8	3	0	1	0	2	0	0	0	0	0	0	0	0	0	0	0	0	0	0	0	0	0	0	0	0	0	0	0	0	0	-55	0	0
2022-05-06	283	4	242	4	19	14	2	0	0	2	0	0	0	0	0	0	0	0	0	0	0	0	0	0	0	0	0	0	0	0	0	0	0	0	0	0	-1	-1	0
2022-05-07	152	3	120	7	13	9	1	0	1	0	0	0	0	0	0	0	0	0	0	0	0	0	0	0	0	0	0	0	0	0	0	0	0	0	0	0	-131	-1	0
2022-05-08	151	1	126	5	13	6	2	0	2	0	0	0	0	0	0	0	0	0	0	0	0	0	0	0	0	0	0	0	0	0	0	0	0	0	0	0	-1	1	0
2022-05-09	418	7	340	13	34	24	6	0	2	0	3	1	0	0	0	0	0	0	0	0	0	0	0	0	1	0	0	0	1	0	0	0	0	0	0	0	267	4	1
2022-05-10	304	1	257	6	28	12	4	0	4	0	0	0	0	0	0	0	0	0	0	0	0	0	0	0	0	0	0	0	0	0	0	0	0	0	0	0	-114	-2	-1
2022-05-11	319	7	265	11	23	13	4	0	3	0	1	0	0	0	0	0	0	0	0	0	0	0	0	0	0	0	0	0	0	0	0	0	0	0	0	0	15	0	0
2022-05-12	337	2	273	7	34	21	3	0	1	0	1	1	0	0	0	0	0	0	0	0	0	0	0	0	0	0	0	0	0	0	0	0	0	0	0	0	18	-1	0
2022-05-13	280	1	241	6	17	15	2	0	1	0	1	0	0	0	0	0	0	0	0	0	0	0	0	0	1	0	0	0	0	1	0	0	0	0	0	0	-57	-1	1
2022-05-14	151	1	122	7	12	9	5	0	2	1	1	1	0	0	0	0	0	0	0	0	0	0	0	0	0	0	0	0	0	0	0	0	0	0	0	0	-129	3	-1
2022-05-15	151	3	126	2	12	8	7	0	4	0	1	2	0	0	0	0	0	0	0	0	0	0	0	0	0	0	0	0	0	0	0	0	0	0	0	0	0	2	0
2022-05-16	431	6	358	13	30	24	4	0	4	0	0	0	0	0	0	0	0	0	0	0	0	0	0	0	0	0	0	0	0	0	0	0	0	0	0	0	280	-3	0
2022-05-17	340	6	281	9	28	16	8	0	5	0	3	0	0	0	0	0	0	0	0	0	0	0	0	0	0	0	0	0	0	0	1	0	1	0	0	0	-91	4	1
2022-05-18	296	3	251	7	22	13	2	0	2	0	0	0	0	0	0	0	0	0	0	0	0	0	0	0	0	0	0	0	0	0	0	0	0	0	0	0	-44	-6	-1
2022-05-19	315	4	268	8	22	13	4	1	3	0	0	0	0	0	0	0	0	0	0	0	0	0	0	0	0	0	0	0	0	0	0	0	0	0	0	0	19	2	0
2022-05-20	314	2	255	11	26	20	8	0	5	1	1	1	0	0	0	0	0	0	0	0	0	0	0	0	0	0	0	0	0	0	0	0	0	0	0	0	-1	4	0
2022-05-21	124	0	100	3	9	12	0	0	0	0	0	0	0	0	0	0	0	0	0	0	0	0	0	0	0	0	0	0	0	0	0	0	0	0	0	0	-190	-8	0
2022-05-22	107	0	88	1	11	7	4	0	3	0	0	1	0	0	0	0	0	0	0	0	0	0	0	0	0	0	0	0	0	0	0	0	0	0	0	0	-17	4	0
2022-05-23	336	2	269	11	34	20	5	0	2	0	3	0	1	0	0	1	0	0	0	0	0	0	0	0	1	0	0	1	0	0	0	0	0	0	0	0	229	1	1
2022-05-24	298	3	236	11	34	14	3	0	1	0	2	0	0	0	0	0	0	0	0	0	0	0	0	0	0	0	0	0	0	0	0	0	0	0	0	0	-38	-2	-1
2022-05-25	244	2	198	8	19	17	2	0	2	0	0	0	0	0	0	0	0	0	0	0	0	0	0	0	0	0	0	0	0	0	0	0	0	0	0	0	-54	-1	0
2022-05-26	229	2	185	8	18	16	4	0	2	0	0	2	0	0	0	0	0	0	0	0	0	0	0	0	0	0	0	0	0	0	0	0	0	0	0	0	-15	2	0
2022-05-27	273	3	221	10	26	13	1	0	0	0	1	0	0	0	0	0	0	0	0	0	0	0	0	0	0	0	0	0	0	0	0	0	0	0	0	0	44	-3	0
2022-05-28	103	0	84	4	11	4	1	0	0	1	0	0	0	0	0	0	0	0	0	0	0	0	0	0	0	0	0	0	0	0	0	0	0	0	0	0	-170	0	0
2022-05-29	126	1	102	2	7	14	2	0	1	0	0	1	0	0	0	0	0	0	0	0	0	0	0	0	1	0	0	0	0	1	0	0	0	0	0	0	23	1	1
2022-05-30	358	7	298	6	34	13	9	0	7	0	1	1	0	0	0	0	0	0	0	0	0	0	0	0	0	0	0	0	0	0	0	0	0	0	0	0	232	7	-1
2022-05-31	322	3	261	20	29	9	2	1	1	0	0	0	0	0	0	0	0	0	0	0	0	0	0	0	0	0	0	0	0	0	0	0	0	0	0	0	-36	-7	0
2022-06-01	272	5	211	25	18	13	3	0	1	2	0	0	0	0	0	0	0	0	0	0	0	0	0	0	0	0	0	0	0	0	0	0	0	0	0	0	-50	1	0
2022-06-02	252	5	186	24	23	14	1	0	1	0	0	0	0	0	0	0	0	0	0	0	0	0	0	0	0	0	0	0	0	0	0	0	0	0	0	0	-20	-2	0
2022-06-03	278	2	211	29	19	17	5	0	4	1	0	0	0	0	0	0	0	0	0	0	0	0	0	0	0	0	0	0	0	0	0	0	0	0	0	0	26	4	0
2022-06-04	135	2	85	20	19	9	2	0	0	0	1	1	0	0	0	0	0	0	0	0	0	0	0	0	0	0	0	0	0	0	0	0	0	0	0	0	-143	-3	0
2022-06-05	136	1	90	24	12	9	4	0	3	1	0	0	0	0	0	0	0	0	0	0	0	0	0	0	0	0	0	0	0	0	0	0	0	0	0	0	1	2	0
2022-06-06	129	4	83	25	8	9	1	0	0	1	0	0	0	0	0	0	0	0	0	0	0	0	0	0	0	0	0	0	0	0	0	0	0	0	0	0	-7	-3	0
2022-06-07	413	8	270	64	45	26	7	1	3	1	0	2	0	0	0	0	0	0	0	0	0	0	0	0	0	0	0	0	0	0	0	0	0	0	0	0	284	6	0
2022-06-08	317	3	189	68	36	21	3	0	1	2	0	0	1	0	0	1	0	0	0	0	0	0	0	0	1	0	0	1	0	0	0	0	0	0	0	0	-96	-4	1
2022-06-09	317	6	174	88	32	17	5	1	3	1	0	0	0	0	0	0	0	0	0	0	0	0	0	0	2	1	0	1	0	0	0	0	0	0	0	0	0	2	1
2022-06-10	274	5	153	75	32	9	2	0	1	0	0	1	0	0	0	0	0	0	0	0	0	0	0	0	0	0	0	0	0	0	0	0	0	0	0	0	-43	-3	-2
2022-06-11	159	1	82	56	12	8	2	0	1	1	0	0	0	0	0	0	0	0	0	0	0	0	0	0	0	0	0	0	0	0	0	0	0	0	0	0	-115	0	0
2022-06-12	133	1	57	51	18	6	1	0	0	1	0	0	0	0	0	0	0	0	0	0	0	0	0	0	0	0	0	0	0	0	0	0	0	0	0	0	-26	-1	0
2022-06-13	454	7	207	170	52	18	5	1	3	0	1	0	1	0	0	0	0	1	0	0	0	0	0	0	1	0	0	0	0	1	0	0	0	0	0	0	321	4	1
2022-06-14	358	5	129	168	39	17	4	0	1	2	1	0	0	0	0	0	0	0	0	0	0	0	0	0	0	0	0	0	0	0	0	0	0	0	0	0	-96	-1	-1
2022-06-15	378	3	120	182	44	29	6	0	1	3	2	0	0	0	0	0	0	0	0	0	0	0	0	0	0	0	0	0	0	0	0	0	0	0	0	0	20	2	0
2022-06-16	356	4	113	180	38	21	4	1	3	0	0	0	0	0	0	0	0	0	0	0	0	0	0	0	0	0	0	0	0	0	0	0	0	0	0	0	-22	-2	0
2022-06-17	354	6	116	195	27	10	6	0	3	1	1	1	0	0	0	0	0	0	0	0	0	0	0	0	0	0	0	0	0	0	0	0	0	0	0	0	-2	2	0
2022-06-18	199	0	64	115	14	6	1	0	0	1	0	0	0	0	0	0	0	0	0	0	0	0	0	0	0	0	0	0	0	0	0	0	0	0	0	0	-155	-5	0
2022-06-19	203	1	57	110	22	13	4	0	0	3	1	0	0	0	0	0	0	0	0	0	0	0	0	0	0	0	0	0	0	0	0	0	0	0	0	0	4	3	0
2022-06-20	603	5	135	378	61	24	6	0	2	3	1	0	0	0	0	0	0	0	0	0	0	0	0	0	0	0	0	0	0	0	0	0	0	0	0	0	400	2	0
2022-06-21	520	3	102	341	39	35	8	0	3	4	0	1	0	0	0	0	0	0	0	0	0	0	0	0	0	0	0	0	0	0	0	0	0	0	0	0	-83	2	0
2022-06-22	482	5	86	320	47	24	4	0	1	3	0	0	0	0	0	0	0	0	0	0	0	0	0	0	0	0	0	0	0	0	0	0	0	0	0	0	-38	-4	0
2022-06-23	421	6	78	266	40	31	10	0	1	5	3	1	0	0	0	0	0	0	0	0	0	0	0	0	0	0	0	0	0	0	0	0	0	0	0	0	-61	6	0
2022-06-24	197	2	34	130	16	15	5	0	2	3	0	0	1	0	0	1	0	0	0	0	0	0	0	0	1	0	0	1	0	0	0	0	0	0	0	0	-224	-5	1
2022-06-25	300	3	59	199	23	16	6	0	2	3	0	1	0	0	0	0	0	0	0	0	0	0	0	0	0	0	0	0	0	0	0	0	0	0	0	0	103	1	-1
2022-06-26	228	4	32	164	18	10	9	0	0	5	2	2	0	0	0	0	0	0	0	0	0	0	0	0	0	0	0	0	0	0	0	0	0	0	0	0	-72	3	0
2022-06-27	699	8	111	485	72	23	12	0	2	7	3	0	1	0	0	1	0	0	0	0	0	0	0	0	1	0	0	1	0	0	0	0	0	0	0	0	471	3	1
2022-06-28	542	5	67	388	51	31	12	0	0	11	0	1	0	0	0	0	0	0	0	0	0	0	0	0	0	0	0	0	0	0	0	0	0	0	0	0	-157	0	-1
2022-06-29	497	5	61	363	44	24	4	0	1	2	1	0	0	0	0	0	0	0	0	0	0	0	0	0	0	0	0	0	0	0	0	0	0	0	0	0	-45	-8	0
2022-06-30	429	7	52	303	47	20	7	0	1	3	2	1	0	0	0	0	0	0	0	0	0	0	0	0	1	0	0	1	0	0	0	0	0	0	0	0	-68	3	1
2022-07-01	449	7	50	312	56	24	6	0	0	6	0	0	0	0	0	0	0	0	0	0	0	0	0	0	1	0	1	0	0	0	0	0	0	0	0	0	20	-1	0
2022-07-02	240	3	32	164	25	16	5	0	1	3	0	1	0	0	0	0	0	0	0	0	0	0	0	0	0	0	0	0	0	0	0	0	0	0	0	0	-209	-1	-1
2022-07-03	207	3	24	145	20	15	5	1	0	2	1	1	0	0	0	0	0	0	0	0	0	0	0	0	0	0	0	0	0	0	0	0	0	0	0	0	-33	0	0
2022-07-04	573	5	60	418	64	26	5	0	0	4	1	0	0	0	0	0	0	0	0	0	0	0	0	0	0	0	0	0	0	0	0	0	0	0	0	0	366	0	0
2022-07-05	445	4	41	321	38	41	8	0	1	5	0	2	0	0	0	0	0	0	0	0	0	0	0	0	0	0	0	0	0	0	0	0	0	0	0	0	-128	3	0
2022-07-06	465	9	50	323	55	28	11	1	2	5	2	1	0	0	0	0	0	0	0	0	0	0	0	0	0	0	0	0	0	0	1	0	0	0	0	1	20	3	1
2022-07-07	356	4	28	256	45	23	11	1	2	4	4	0	0	0	0	0	0	0	0	0	0	0	0	0	0	0	0	0	0	0	0	0	0	0	0	0	-109	0	-1
2022-07-08	347	5	30	255	39	18	4	0	0	4	0	0	0	0	0	0	0	0	0	0	0	0	0	0	0	0	0	0	0	0	0	0	0	0	0	0	-9	-7	0
2022-07-09	165	2	10	130	11	12	5	0	0	5	0	0	0	0	0	0	0	0	0	0	0	0	0	0	0	0	0	0	0	0	0	0	0	0	0	0	-182	1	0
2022-07-10	150	2	8	121	11	8	4	0	0	3	1	0	0	0	0	0	0	0	0	0	0	0	0	0	0	0	0	0	0	0	0	0	0	0	0	0	-15	-1	0
2022-07-11	425	4	21	322	53	25	10	0	1	7	1	1	0	0	0	0	0	0	0	0	0	0	0	0	0	0	0	0	0	0	0	0	0	0	0	0	275	6	0
2022-07-12	375	9	21	290	39	16	5	1	0	4	0	0	0	0	0	0	0	0	0	0	0	0	0	0	0	0	0	0	0	0	0	0	0	0	0	0	-50	-5	0
2022-07-13	289	0	23	221	28	17	5	0	0	4	0	1	0	0	0	0	0	0	0	0	0	0	0	0	0	0	0	0	0	0	0	0	0	0	0	0	-86	0	0
2022-07-14	235	2	21	179	25	8	5	0	0	4	1	0	0	0	0	0	0	0	0	0	0	0	0	0	0	0	0	0	0	0	0	0	0	0	0	0	-54	0	0
2022-07-15	238	4	9	189	26	10	4	0	0	3	1	0	0	0	0	0	0	0	0	0	0	0	0	0	0	0	0	0	0	0	0	0	0	0	0	0	3	-1	0
2022-07-16	145	0	6	109	19	11	7	0	0	3	2	2	0	0	0	0	0	0	1	0	0	0	0	1	0	0	0	0	0	0	1	0	0	0	0	1	-93	3	1
2022-07-17	109	2	4	81	11	11	10	0	0	4	4	2	0	0	0	0	0	0	0	0	0	0	0	0	0	0	0	0	0	0	0	0	0	0	0	0	-36	3	-1
2022-07-18	270	6	13	204	31	16	10	1	0	7	1	1	0	0	0	0	0	0	0	0	0	0	0	0	0	0	0	0	0	0	0	0	0	0	0	0	161	0	0
2022-07-19	241	2	12	192	24	11	5	0	0	3	1	1	0	0	0	0	0	0	0	0	0	0	0	0	1	1	0	0	0	0	0	0	0	0	0	0	-29	-5	1
2022-07-20	186	1	6	146	23	10	6	0	0	1	3	2	0	0	0	0	0	0	0	0	0	0	0	0	0	0	0	0	0	0	0	0	0	0	0	0	-55	1	-1
2022-07-21	180	3	6	135	24	12	6	1	0	4	1	0	0	0	0	0	0	0	0	0	0	0	0	0	0	0	0	0	0	0	0	0	0	0	0	0	-6	0	0
2022-07-22	155	2	5	124	18	6	8	0	2	5	1	0	0	0	0	0	0	0	1	0	0	1	0	0	0	0	0	0	0	0	1	0	0	1	0	0	-25	2	1
2022-07-23	85	2	3	66	10	4	4	0	0	4	0	0	0	0	0	0	0	0	0	0	0	0	0	0	1	1	0	0	0	0	0	0	0	0	0	0	-70	-4	0
2022-07-24	88	0	2	74	10	2	7	0	0	4	2	1	0	0	0	0	0	0	0	0	0	0	0	0	0	0	0	0	0	0	0	0	0	0	0	0	3	3	-1
2022-07-25	188	4	7	144	19	14	9	0	1	6	1	1	0	0	0	0	0	0	0	0	0	0	0	0	1	0	0	1	0	0	0	0	0	0	0	0	100	2	1
2022-07-26	152	5	3	122	15	7	4	0	1	3	0	0	0	0	0	0	0	0	0	0	0	0	0	0	0	0	0	0	0	0	0	0	0	0	0	0	-36	-5	-1
2022-07-27	146	4	6	110	14	12	8	0	0	7	1	0	0	0	0	0	0	0	1	0	0	0	1	0	0	0	0	0	0	0	1	0	0	0	1	0	-6	4	1
2022-07-28	118	1	9	90	13	5	6	0	2	3	0	1	0	0	0	0	0	0	0	0	0	0	0	0	0	0	0	0	0	0	0	0	0	0	0	0	-28	-2	-1
2022-07-29	119	1	5	94	16	3	4	0	1	1	1	1	0	0	0	0	0	0	1	0	0	0	0	1	0	0	0	0	0	0	1	0	0	0	0	1	1	-2	1
2022-07-30	55	1	0	46	6	2	2	1	0	1	0	0	0	0	0	0	0	0	0	0	0	0	0	0	0	0	0	0	0	0	0	0	0	0	0	0	-64	-2	-1
2022-07-31	49	0	2	44	2	1	0	0	0	0	0	0	0	0	0	0	0	0	0	0	0	0	0	0	0	0	0	0	0	0	0	0	0	0	0	0	-6	-2	0
2022-08-01	138	1	4	108	17	8	3	0	0	3	0	0	0	0	0	0	0	0	0	0	0	0	0	0	1	0	0	1	0	0	0	0	0	0	0	0	89	3	1
2022-08-02	95	2	0	77	12	4	5	1	0	3	1	0	0	0	0	0	0	0	0	0	0	0	0	0	0	0	0	0	0	0	0	0	0	0	0	0	-43	2	-1
2022-08-03	83	2	1	70	7	3	0	0	0	0	0	0	0	0	0	0	0	0	0	0	0	0	0	0	0	0	0	0	0	0	0	0	0	0	0	0	-12	-5	0
2022-08-04	85	0	2	73	5	5	1	0	0	1	0	0	0	0	0	0	0	0	0	0	0	0	0	0	0	0	0	0	0	0	0	0	0	0	0	0	2	1	0
2022-08-05	71	1	3	54	10	3	4	0	0	1	3	0	0	0	0	0	0	0	0	0	0	0	0	0	0	0	0	0	0	0	0	0	0	0	0	0	-14	3	0
2022-08-06	45	0	0	33	5	7	3	0	0	2	0	1	0	0	0	0	0	0	0	0	0	0	0	0	0	0	0	0	0	0	0	0	0	0	0	0	-26	-1	0
2022-08-07	39	0	0	30	7	2	2	0	0	1	1	0	0	0	0	0	0	0	0	0	0	0	0	0	0	0	0	0	0	0	0	0	0	0	0	0	-6	-1	0
2022-08-08	101	3	0	84	9	5	2	1	0	0	0	1	0	0	0	0	0	0	0	0	0	0	0	0	0	0	0	0	0	0	0	0	0	0	0	0	62	0	0
2022-08-09	82	4	5	57	11	5	4	1	0	2	1	0	0	0	0	0	0	0	0	0	0	0	0	0	0	0	0	0	0	0	0	0	0	0	0	0	-19	2	0
2022-08-10	72	2	5	49	6	10	1	0	0	0	1	0	0	0	0	0	0	0	0	0	0	0	0	0	0	0	0	0	0	0	0	0	0	0	0	0	-10	-3	0
2022-08-11	49	0	0	36	8	5	2	0	0	2	0	0	0	0	0	0	0	0	0	0	0	0	0	0	0	0	0	0	0	0	0	0	0	0	0	0	-23	1	0
2022-08-12	54	0	1	42	7	4	4	0	0	1	2	1	0	0	0	0	0	0	0	0	0	0	0	0	0	0	0	0	0	0	0	0	0	0	0	0	5	2	0
2022-08-13	31	0	1	24	3	3	1	0	0	0	1	0	0	0	0	0	0	0	0	0	0	0	0	0	0	0	0	0	0	0	0	0	0	0	0	0	-23	-3	0
2022-08-14	21	0	1	17	1	2	0	0	0	0	0	0	0	0	0	0	0	0	0	0	0	0	0	0	0	0	0	0	0	0	0	0	0	0	0	0	-10	-1	0
2022-08-15	29	0	0	25	2	2	2	0	0	2	0	0	0	0	0	0	0	0	0	0	0	0	0	0	0	0	0	0	0	0	0	0	0	0	0	0	8	2	0
2022-08-16	55	0	1	46	5	3	2	0	0	2	0	0	0	0	0	0	0	0	0	0	0	0	0	0	0	0	0	0	0	0	0	0	0	0	0	0	26	0	0
2022-08-17	45	1	0	37	5	2	2	0	0	0	0	2	0	0	0	0	0	0	0	0	0	0	0	0	0	0	0	0	0	0	0	0	0	0	0	0	-10	0	0
2022-08-18	47	1	0	38	7	1	1	0	0	1	0	0	0	0	0	0	0	0	0	0	0	0	0	0	0	0	0	0	0	0	0	0	0	0	0	0	2	-1	0
2022-08-19	41	0	1	28	7	5	0	0	0	0	0	0	0	0	0	0	0	0	0	0	0	0	0	0	0	0	0	0	0	0	0	0	0	0	0	0	-6	-1	0
2022-08-20	31	0	3	20	5	3	1	0	0	0	0	1	0	0	0	0	0	0	0	0	0	0	0	0	0	0	0	0	0	0	0	0	0	0	0	0	-10	1	0
2022-08-21	28	0	0	23	4	1	3	0	0	3	0	0	0	0	0	0	0	0	0	0	0	0	0	0	0	0	0	0	0	0	0	0	0	0	0	0	-3	2	0
2022-08-22	76	0	1	66	6	3	2	0	0	2	0	0	0	0	0	0	0	0	0	0	0	0	0	0	0	0	0	0	0	0	1	0	0	1	0	0	48	-1	1
2022-08-23	51	1	0	45	3	2	2	0	0	2	0	0	0	0	0	0	0	0	0	0	0	0	0	0	0	0	0	0	0	0	0	0	0	0	0	0	-25	0	-1
2022-08-24	57	0	3	41	10	3	4	0	0	3	1	0	0	0	0	0	0	0	0	0	0	0	0	0	0	0	0	0	0	0	0	0	0	0	0	0	6	2	0
2022-08-25	42	1	0	33	4	4	2	0	0	1	0	1	0	0	0	0	0	0	0	0	0	0	0	0	0	0	0	0	0	0	0	0	0	0	0	0	-15	-2	0
2022-08-26	29	0	0	25	3	1	2	0	0	2	0	0	0	0	0	0	0	0	0	0	0	0	0	0	0	0	0	0	0	0	0	0	0	0	0	0	-13	0	0
2022-08-27	24	0	0	16	7	1	1	0	0	0	1	0	0	0	0	0	0	0	0	0	0	0	0	0	0	0	0	0	0	0	0	0	0	0	0	0	-5	-1	0
2022-08-28	26	0	1	21	4	0	1	0	0	1	0	0	0	0	0	0	0	0	0	0	0	0	0	0	0	0	0	0	0	0	0	0	0	0	0	0	2	0	0
2022-08-29	65	0	1	51	11	2	3	0	1	1	1	0	0	0	0	0	0	0	0	0	0	0	0	0	0	0	0	0	0	0	0	0	0	0	0	0	39	2	0
2022-08-30	54	1	1	37	12	3	3	0	0	2	1	0	0	0	0	0	0	0	0	0	0	0	0	0	0	0	0	0	0	0	0	0	0	0	0	0	-11	0	0
2022-08-31	48	0	0	37	10	1	1	0	0	1	0	0	0	0	0	0	0	0	0	0	0	0	0	0	0	0	0	0	0	0	0	0	0	0	0	0	-6	-2	0
2022-09-01	51	2	0	40	5	4	2	0	0	2	0	0	0	0	0	0	0	0	0	0	0	0	0	0	0	0	0	0	0	0	0	0	0	0	0	0	3	1	0
2022-09-02	32	1	1	21	5	4	1	1	0	0	0	0	0	0	0	0	0	0	0	0	0	0	0	0	0	0	0	0	0	0	0	0	0	0	0	0	-19	-1	0
2022-09-03	31	0	0	22	7	2	1	0	0	0	1	0	0	0	0	0	0	0	0	0	0	0	0	0	0	0	0	0	0	0	0	0	0	0	0	0	-1	0	0
2022-09-04	27	0	0	19	6	2	3	0	0	2	1	0	0	0	0	0	0	0	0	0	0	0	0	0	0	0	0	0	0	0	0	0	0	0	0	0	-4	2	0
2022-09-05	53	0	2	33	14	4	2	0	1	0	1	0	0	0	0	0	0	0	0	0	0	0	0	0	0	0	0	0	0	0	0	0	0	0	0	0	26	-1	0
2022-09-06	35	0	2	20	13	0	0	0	0	0	0	0	0	0	0	0	0	0	0	0	0	0	0	0	0	0	0	0	0	0	0	0	0	0	0	0	-18	-2	0
2022-09-07	37	0	1	25	9	2	0	0	0	0	0	0	0	0	0	0	0	0	0	0	0	0	0	0	0	0	0	0	0	0	0	0	0	0	0	0	2	0	0
2022-09-08	35	0	2	15	17	1	1	0	0	0	1	0	0	0	0	0	0	0	0	0	0	0	0	0	0	0	0	0	0	0	0	0	0	0	0	0	-2	1	0
2022-09-09	45	0	1	19	23	2	1	0	0	1	0	0	0	0	0	0	0	0	0	0	0	0	0	0	0	0	0	0	0	0	0	0	0	0	0	0	10	0	0
2022-09-10	26	0	1	7	17	1	0	0	0	0	0	0	0	0	0	0	0	0	0	0	0	0	0	0	0	0	0	0	0	0	0	0	0	0	0	0	-19	-1	0
2022-09-11	29	0	1	14	11	3	1	0	0	0	0	1	0	0	0	0	0	0	0	0	0	0	0	0	0	0	0	0	0	0	0	0	0	0	0	0	3	1	0
2022-09-12	51	1	1	17	31	1	1	1	0	0	0	0	0	0	0	0	0	0	0	0	0	0	0	0	0	0	0	0	0	0	0	0	0	0	0	0	22	0	0
2022-09-13	52	1	2	21	27	1	0	0	0	0	0	0	0	0	0	0	0	0	0	0	0	0	0	0	0	0	0	0	0	0	0	0	0	0	0	0	1	-1	0
2022-09-14	48	0	2	18	28	0	2	0	0	0	2	0	0	0	0	0	0	0	0	0	0	0	0	0	0	0	0	0	0	0	0	0	0	0	0	0	-4	2	0
2022-09-15	43	0	1	19	20	3	4	0	1	0	3	0	0	0	0	0	0	0	1	0	1	0	0	0	0	0	0	0	0	0	1	0	1	0	0	0	-5	2	1
2022-09-16	38	0	1	8	28	1	3	0	1	1	1	0	0	0	0	0	0	0	0	0	0	0	0	0	0	0	0	0	0	0	0	0	0	0	0	0	-5	-1	-1
2022-09-17	27	0	0	5	20	2	2	0	0	1	1	0	0	0	0	0	0	0	0	0	0	0	0	0	0	0	0	0	0	0	0	0	0	0	0	0	-11	-1	0
2022-09-18	23	0	1	4	16	2	2	0	0	1	1	0	0	0	0	0	0	0	0	0	0	0	0	0	0	0	0	0	0	0	0	0	0	0	0	0	-4	0	0
2022-09-19	59	0	0	13	39	7	0	0	0	0	0	0	0	0	0	0	0	0	0	0	0	0	0	0	0	0	0	0	0	0	0	0	0	0	0	0	36	-2	0
2022-09-20	58	0	0	9	42	7	1	0	0	0	1	0	0	0	0	0	0	0	0	0	0	0	0	0	0	0	0	0	0	0	0	0	0	0	0	0	-1	1	0
2022-09-21	45	0	2	6	32	5	2	0	0	0	2	0	0	0	0	0	0	0	1	0	0	0	1	0	0	0	0	0	0	0	1	0	0	0	1	0	-13	1	1
2022-09-22	44	0	1	7	35	1	1	0	0	0	1	0	0	0	0	0	0	0	0	0	0	0	0	0	0	0	0	0	0	0	0	0	0	0	0	0	-1	-1	-1
2022-09-23	28	1	0	3	22	2	0	0	0	0	0	0	0	0	0	0	0	0	0	0	0	0	0	0	0	0	0	0	0	0	0	0	0	0	0	0	-16	-1	0
2022-09-24	22	0	0	2	17	3	0	0	0	0	0	0	0	0	0	0	0	0	0	0	0	0	0	0	0	0	0	0	0	0	0	0	0	0	0	0	-6	0	0
2022-09-25	20	0	0	3	15	2	2	0	0	0	2	0	0	0	0	0	0	0	0	0	0	0	0	0	0	0	0	0	0	0	0	0	0	0	0	0	-2	2	0
2022-09-26	65	0	2	7	52	4	1	0	0	0	1	0	0	0	0	0	0	0	0	0	0	0	0	0	0	0	0	0	0	0	0	0	0	0	0	0	45	-1	0
2022-09-27	58	0	0	8	46	4	1	0	0	1	0	0	0	0	0	0	0	0	0	0	0	0	0	0	0	0	0	0	0	0	0	0	0	0	0	0	-7	0	0
2022-09-28	54	0	3	4	45	2	1	0	0	0	1	0	0	0	0	0	0	0	0	0	0	0	0	0	0	0	0	0	0	0	0	0	0	0	0	0	-4	0	0
2022-09-29	66	0	3	9	49	5	3	0	0	1	2	0	0	0	0	0	0	0	0	0	0	0	0	0	0	0	0	0	0	0	0	0	0	0	0	0	12	2	0
2022-09-30	26	0	2	3	20	1	0	0	0	0	0	0	0	0	0	0	0	0	0	0	0	0	0	0	0	0	0	0	0	0	0	0	0	0	0	0	-40	-3	0
2022-10-01	23	0	1	3	17	2	3	0	0	0	2	1	0	0	0	0	0	0	1	0	0	0	1	0	0	0	0	0	0	0	1	0	0	0	1	0	-3	3	1
2022-10-02	30	0	0	3	23	4	1	0	0	1	0	0	0	0	0	0	0	0	0	0	0	0	0	0	0	0	0	0	0	0	0	0	0	0	0	0	7	-2	-1
2022-10-03	85	1	0	13	65	6	3	0	0	0	3	0	0	0	0	0	0	0	0	0	0	0	0	0	0	0	0	0	0	0	0	0	0	0	0	0	55	2	0
2022-10-04	76	2	0	3	70	1	2	0	0	0	2	0	0	0	0	0	0	0	0	0	0	0	0	0	1	0	0	0	1	0	0	0	0	0	0	0	-9	-1	1
2022-10-05	90	0	2	5	73	10	3	0	0	0	1	2	0	0	0	0	0	0	0	0	0	0	0	0	0	0	0	0	0	0	0	0	0	0	0	0	14	1	-1
2022-10-06	73	0	1	3	66	3	2	0	0	0	2	0	0	0	0	0	0	0	0	0	0	0	0	0	0	0	0	0	0	0	0	0	0	0	0	0	-17	-1	0
2022-10-07	70	0	0	3	58	9	0	0	0	0	0	0	0	0	0	0	0	0	0	0	0	0	0	0	0	0	0	0	0	0	0	0	0	0	0	0	-3	-2	0
2022-10-08	31	0	0	4	27	0	3	0	0	0	3	0	0	0	0	0	0	0	0	0	0	0	0	0	0	0	0	0	0	0	0	0	0	0	0	0	-39	3	0
2022-10-09	29	0	0	3	20	6	3	0	0	1	2	0	0	0	0	0	0	0	0	0	0	0	0	0	0	0	0	0	0	0	0	0	0	0	0	0	-2	0	0
2022-10-10	122	2	2	4	110	4	5	0	0	0	5	0	0	0	0	0	0	0	0	0	0	0	0	0	0	0	0	0	0	0	0	0	0	0	0	0	93	2	0
2022-10-11	94	1	3	6	78	6	2	0	0	0	2	0	0	0	0	0	0	0	0	0	0	0	0	0	0	0	0	0	0	0	0	0	0	0	0	0	-28	-3	0
2022-10-12	30	1	0	1	26	2	2	0	0	0	2	0	0	0	0	0	0	0	0	0	0	0	0	0	0	0	0	0	0	0	0	0	0	0	0	0	-64	0	0
2022-10-13	96	2	0	5	82	7	5	1	0	0	4	0	0	0	0	0	0	0	0	0	0	0	0	0	0	0	0	0	0	0	0	0	0	0	0	0	66	3	0
2022-10-14	72	2	0	2	63	5	3	0	0	0	3	0	0	0	0	0	0	0	0	0	0	0	0	0	0	0	0	0	0	0	0	0	0	0	0	0	-24	-2	0
2022-10-15	41	0	1	1	35	4	2	0	0	0	1	1	0	0	0	0	0	0	0	0	0	0	0	0	0	0	0	0	0	0	0	0	0	0	0	0	-31	-1	0
2022-10-16	31	2	1	1	25	2	2	1	1	0	0	0	0	0	0	0	0	0	0	0	0	0	0	0	0	0	0	0	0	0	0	0	0	0	0	0	-10	0	0
2022-10-17	91	0	3	4	78	6	3	0	0	0	2	1	0	0	0	0	0	0	0	0	0	0	0	0	0	0	0	0	0	0	0	0	0	0	0	0	60	1	0
2022-10-18	82	3	0	4	71	4	4	0	0	0	3	1	0	0	0	0	0	0	0	0	0	0	0	0	0	0	0	0	0	0	0	0	0	0	0	0	-9	1	0
2022-10-19	77	6	2	8	57	4	2	0	1	1	0	0	0	0	0	0	0	0	0	0	0	0	0	0	0	0	0	0	0	0	0	0	0	0	0	0	-5	-2	0
2022-10-20	72	3	1	1	64	3	2	0	0	0	2	0	0	0	0	0	0	0	0	0	0	0	0	0	0	0	0	0	0	0	0	0	0	0	0	0	-5	0	0
2022-10-21	83	2	2	3	73	3	1	0	0	0	1	0	0	0	0	0	0	0	0	0	0	0	0	0	0	0	0	0	0	0	0	0	0	0	0	0	11	-1	0
2022-10-22	35	0	0	0	34	1	2	0	0	0	1	1	0	0	0	0	0	0	0	0	0	0	0	0	0	0	0	0	0	0	0	0	0	0	0	0	-48	1	0
2022-10-23	37	1	1	2	32	1	1	0	0	0	1	0	0	0	0	0	0	0	0	0	0	0	0	0	0	0	0	0	0	0	0	0	0	0	0	0	2	-1	0
2022-10-24	117	5	1	6	101	4	1	0	0	0	1	0	0	0	0	0	0	0	1	0	0	0	1	0	0	0	0	0	0	0	1	0	0	0	1	0	80	0	1
2022-10-25	89	8	1	3	77	0	2	0	0	0	2	0	0	0	0	0	0	0	0	0	0	0	0	0	0	0	0	0	0	0	0	0	0	0	0	0	-28	1	-1
2022-10-26	80	6	0	2	68	4	6	1	0	0	4	1	0	0	0	0	0	0	0	0	0	0	0	0	0	0	0	0	0	0	0	0	0	0	0	0	-9	4	0
2022-10-27	91	6	2	4	77	2	4	0	0	1	3	0	0	0	0	0	0	0	0	0	0	0	0	0	0	0	0	0	0	0	0	0	0	0	0	0	11	-2	0
2022-10-28	80	4	3	3	67	3	3	0	0	0	2	1	0	0	0	0	0	0	0	0	0	0	0	0	0	0	0	0	0	0	0	0	0	0	0	0	-11	-1	0
2022-10-29	34	2	0	1	25	6	2	0	0	0	1	1	0	0	0	0	0	0	0	0	0	0	0	0	0	0	0	0	0	0	0	0	0	0	0	0	-46	-1	0
2022-10-30	44	3	1	1	35	4	1	0	0	0	0	1	0	0	0	0	0	0	0	0	0	0	0	0	0	0	0	0	0	0	0	0	0	0	0	0	10	-1	0
2022-10-31	104	4	2	1	92	5	5	0	0	1	4	0	0	0	0	0	0	0	0	0	0	0	0	0	0	0	0	0	0	0	0	0	0	0	0	0	60	4	0
2022-11-01	50	2	3	0	43	2	5	1	2	0	2	0	0	0	0	0	0	0	0	0	0	0	0	0	0	0	0	0	0	0	0	0	0	0	0	0	-54	0	0
2022-11-02	129	9	2	9	99	10	0	0	0	0	0	0	0	0	0	0	0	0	0	0	0	0	0	0	0	0	0	0	0	0	0	0	0	0	0	0	79	-5	0
2022-11-03	83	7	1	3	65	7	2	0	0	0	2	0	0	0	0	0	0	0	0	0	0	0	0	0	0	0	0	0	0	0	0	0	0	0	0	0	-46	2	0
2022-11-04	92	8	1	0	81	2	2	1	0	0	1	0	0	0	0	0	0	0	0	0	0	0	0	0	0	0	0	0	0	0	0	0	0	0	0	0	9	0	0
2022-11-05	38	3	0	0	32	3	1	0	0	0	1	0	0	0	0	0	0	0	0	0	0	0	0	0	0	0	0	0	0	0	0	0	0	0	0	0	-54	-1	0
2022-11-06	31	2	2	0	23	4	3	0	1	0	0	2	0	0	0	0	0	0	0	0	0	0	0	0	0	0	0	0	0	0	0	0	0	0	0	0	-7	2	0
2022-11-07	126	8	1	1	109	7	8	0	0	0	8	0	0	0	0	0	0	0	0	0	0	0	0	0	0	0	0	0	0	0	0	0	0	0	0	0	95	5	0
2022-11-08	107	9	1	0	91	6	1	0	0	0	1	0	0	0	0	0	0	0	0	0	0	0	0	0	0	0	0	0	0	0	0	0	0	0	0	0	-19	-7	0
2022-11-09	103	11	1	5	80	6	3	0	0	1	2	0	0	0	0	0	0	0	0	0	0	0	0	0	1	0	0	0	1	0	0	0	0	0	0	0	-4	2	1
2022-11-10	88	8	3	4	70	3	5	1	0	0	2	2	0	0	0	0	0	0	0	0	0	0	0	0	0	0	0	0	0	0	0	0	0	0	0	0	-15	2	-1
2022-11-11	105	9	1	4	87	4	3	1	0	1	1	0	0	0	0	0	0	0	0	0	0	0	0	0	0	0	0	0	0	0	0	0	0	0	0	0	17	-2	0
2022-11-12	49	4	1	0	43	1	2	0	0	0	2	0	0	0	0	0	0	0	0	0	0	0	0	0	0	0	0	0	0	0	0	0	0	0	0	0	-56	-1	0
2022-11-13	42	2	1	0	37	2	1	0	0	0	1	0	0	0	0	0	0	0	0	0	0	0	0	0	0	0	0	0	0	0	0	0	0	0	0	0	-7	-1	0
2022-11-14	154	19	0	3	128	4	2	0	0	0	2	0	0	0	0	0	0	0	0	0	0	0	0	0	0	0	0	0	0	0	0	0	0	0	0	0	112	1	0
2022-11-15	118	14	0	2	99	3	7	1	0	0	6	0	0	0	0	0	0	0	0	0	0	0	0	0	0	0	0	0	0	0	0	0	0	0	0	0	-36	5	0
2022-11-16	128	17	2	2	103	4	3	1	0	0	2	0	0	0	0	0	0	0	0	0	0	0	0	0	0	0	0	0	0	0	0	0	0	0	0	0	10	-4	0
2022-11-17	100	14	1	2	76	7	2	1	0	0	1	0	0	0	0	0	0	0	0	0	0	0	0	0	0	0	0	0	0	0	0	0	0	0	0	0	-28	-1	0
2022-11-18	115	18	1	1	93	2	2	0	0	0	2	0	0	0	0	0	0	0	0	0	0	0	0	0	0	0	0	0	0	0	0	0	0	0	0	0	15	0	0
2022-11-19	52	5	0	2	42	3	4	0	0	1	2	1	0	0	0	0	0	0	0	0	0	0	0	0	0	0	0	0	0	0	0	0	0	0	0	0	-63	2	0
2022-11-20	40	7	0	4	27	2	2	0	0	1	1	0	0	0	0	0	0	0	0	0	0	0	0	0	0	0	0	0	0	0	0	0	0	0	0	0	-12	-2	0
2022-11-21	123	17	1	4	93	8	8	3	0	0	4	1	0	0	0	0	0	0	0	0	0	0	0	0	0	0	0	0	0	0	0	0	0	0	0	0	83	6	0
2022-11-22	95	19	1	3	69	3	3	0	0	0	3	0	0	0	0	0	0	0	0	0	0	0	0	0	0	0	0	0	0	0	0	0	0	0	0	0	-28	-5	0
2022-11-23	131	20	1	2	104	4	9	2	0	0	6	1	0	0	0	0	0	0	0	0	0	0	0	0	0	0	0	0	0	0	0	0	0	0	0	0	36	6	0
2022-11-24	94	13	1	4	69	7	4	0	0	0	3	1	0	0	0	0	0	0	0	0	0	0	0	0	0	0	0	0	0	0	0	0	0	0	0	0	-37	-5	0
2022-11-25	109	16	2	1	83	7	4	0	0	0	3	1	0	0	0	0	0	0	0	0	0	0	0	0	0	0	0	0	0	0	0	0	0	0	0	0	15	0	0
2022-11-26	46	3	0	1	41	1	5	1	0	0	4	0	0	0	0	0	0	0	0	0	0	0	0	0	0	0	0	0	0	0	0	0	0	0	0	0	-63	1	0
2022-11-27	46	8	1	0	36	1	3	1	1	0	1	0	0	0	0	0	0	0	0	0	0	0	0	0	0	0	0	0	0	0	0	0	0	0	0	0	0	-2	0
2022-11-28	128	25	0	5	92	6	2	1	0	0	1	0	0	0	0	0	0	0	0	0	0	0	0	0	0	0	0	0	0	0	0	0	0	0	0	0	82	-1	0
2022-11-29	95	14	3	2	68	8	4	0	1	0	2	1	0	0	0	0	0	0	0	0	0	0	0	0	0	0	0	0	0	0	0	0	0	0	0	0	-33	2	0
2022-11-30	118	16	3	2	89	8	4	0	0	0	4	0	0	0	0	0	0	0	0	0	0	0	0	0	0	0	0	0	0	0	0	0	0	0	0	0	23	0	0
2022-12-01	85	19	1	1	60	4	7	0	0	0	6	1	0	0	0	0	0	0	0	0	0	0	0	0	0	0	0	0	0	0	0	0	0	0	0	0	-33	3	0
2022-12-02	91	14	0	4	67	6	4	1	0	0	2	1	0	0	0	0	0	0	0	0	0	0	0	0	0	0	0	0	0	0	0	0	0	0	0	0	6	-3	0
2022-12-03	46	9	1	1	33	2	6	1	1	1	3	0	0	0	0	0	0	0	0	0	0	0	0	0	0	0	0	0	0	0	0	0	0	0	0	0	-45	2	0
2022-12-04	47	9	1	1	32	4	10	1	1	0	6	2	0	0	0	0	0	0	0	0	0	0	0	0	0	0	0	0	0	0	0	0	0	0	0	0	1	4	0
2022-12-05	103	22	1	3	69	8	6	0	0	0	3	3	0	0	0	0	0	0	0	0	0	0	0	0	0	0	0	0	0	0	0	0	0	0	0	0	56	-4	0
2022-12-06	58	16	2	2	33	5	6	1	1	0	3	1	0	0	0	0	0	0	0	0	0	0	0	0	0	0	0	0	0	0	0	0	0	0	0	0	-45	0	0
2022-12-07	119	26	0	3	78	12	6	0	0	2	2	2	0	0	0	0	0	0	0	0	0	0	0	0	0	0	0	0	0	0	0	0	0	0	0	0	61	0	0
2022-12-08	41	10	1	0	30	0	5	1	1	0	3	0	0	0	0	0	0	0	0	0	0	0	0	0	0	0	0	0	0	0	0	0	0	0	0	0	-78	-1	0
2022-12-09	105	20	2	6	69	8	5	2	0	1	2	0	0	0	0	0	0	0	0	0	0	0	0	0	0	0	0	0	0	0	0	0	0	0	0	0	64	0	0
2022-12-10	43	6	1	1	31	4	6	1	1	1	3	0	0	0	0	0	0	0	0	0	0	0	0	0	0	0	0	0	0	0	0	0	0	0	0	0	-62	1	0
2022-12-11	46	8	1	1	31	5	7	1	1	0	5	0	0	0	0	0	0	0	0	0	0	0	0	0	0	0	0	0	0	0	0	0	0	0	0	0	3	1	0
2022-12-12	103	20	0	3	72	8	3	1	0	0	1	1	0	0	0	0	0	0	0	0	0	0	0	0	0	0	0	0	0	0	0	0	0	0	0	0	57	-4	0
2022-12-13	72	12	4	1	50	5	7	1	0	0	5	1	0	0	0	0	0	0	0	0	0	0	0	0	0	0	0	0	0	0	0	0	0	0	0	0	-31	4	0
2022-12-14	90	24	4	1	55	6	5	3	0	0	2	0	0	0	0	0	0	0	0	0	0	0	0	0	1	0	0	0	1	0	0	0	0	0	0	0	18	-2	1
2022-12-15	60	10	1	0	42	7	6	0	0	0	5	1	0	0	0	0	0	0	0	0	0	0	0	0	0	0	0	0	0	0	0	0	0	0	0	0	-30	1	-1
2022-12-16	68	20	2	1	37	8	5	2	0	0	3	0	0	0	0	0	0	0	0	0	0	0	0	0	0	0	0	0	0	0	0	0	0	0	0	0	8	-1	0
2022-12-17	27	6	0	0	18	3	1	0	0	0	1	0	0	0	0	0	0	0	0	0	0	0	0	0	0	0	0	0	0	0	0	0	0	0	0	0	-41	-4	0
2022-12-18	28	7	0	1	19	1	5	0	0	1	3	1	0	0	0	0	0	0	0	0	0	0	0	0	0	0	0	0	0	0	0	0	0	0	0	0	1	4	0
2022-12-19	79	12	1	2	57	7	4	1	0	0	3	0	0	0	0	0	0	0	0	0	0	0	0	0	0	0	0	0	0	0	0	0	0	0	0	0	51	-1	0
2022-12-20	63	12	0	1	48	2	5	1	0	1	2	1	0	0	0	0	0	0	0	0	0	0	0	0	0	0	0	0	0	0	0	0	0	0	0	0	-16	1	0
2022-12-21	53	15	0	0	33	5	3	1	0	0	2	0	0	0	0	0	0	0	0	0	0	0	0	0	0	0	0	0	0	0	0	0	0	0	0	0	-10	-2	0
2022-12-22	48	10	0	2	32	4	3	1	0	1	1	0	0	0	0	0	0	0	0	0	0	0	0	0	0	0	0	0	0	0	0	0	0	0	0	0	-5	0	0
2022-12-23	47	16	0	2	28	1	4	1	0	1	2	0	0	0	0	0	0	0	0	0	0	0	0	0	0	0	0	0	0	0	0	0	0	0	0	0	-1	1	0
2022-12-24	20	4	0	0	14	2	4	1	0	0	2	1	0	0	0	0	0	0	0	0	0	0	0	0	0	0	0	0	0	0	0	0	0	0	0	0	-27	0	0
2022-12-25	20	7	0	2	10	1	1	1	0	0	0	0	0	0	0	0	0	0	0	0	0	0	0	0	0	0	0	0	0	0	0	0	0	0	0	0	0	-3	0
2022-12-26	19	5	1	1	9	3	2	0	0	0	1	1	0	0	0	0	0	0	0	0	0	0	0	0	0	0	0	0	0	0	0	0	0	0	0	0	-1	1	0
2022-12-27	38	9	1	1	26	1	4	2	0	0	2	0	0	0	0	0	0	0	0	0	0	0	0	0	0	0	0	0	0	0	0	0	0	0	0	0	19	2	0
2022-12-28	53	10	0	2	34	7	5	0	0	0	3	2	0	0	0	0	0	0	0	0	0	0	0	0	0	0	0	0	0	0	0	0	0	0	0	0	15	1	0
2022-12-29	43	10	1	3	22	7	4	2	0	0	2	0	0	0	0	0	0	0	0	0	0	0	0	0	0	0	0	0	0	0	0	0	0	0	0	0	-10	-1	0
2022-12-30	36	3	1	0	31	1	2	0	1	0	1	0	0	0	0	0	0	0	0	0	0	0	0	0	0	0	0	0	0	0	0	0	0	0	0	0	-7	-2	0
2022-12-31	20	2	0	0	15	3	5	1	0	0	4	0	0	0	0	0	0	0	0	0	0	0	0	0	0	0	0	0	0	0	0	0	0	0	0	0	-16	3	0
2023-01-01	8	1	1	0	6	0	1	0	0	0	1	0	0	0	0	0	0	0	0	0	0	0	0	0	0	0	0	0	0	0	0	0	0	0	0	0	-12	-4	0
2023-01-02	33	10	0	1	20	2	3	0	0	1	2	0	0	0	0	0	0	0	0	0	0	0	0	0	0	0	0	0	0	0	0	0	0	0	0	0	25	2	0
2023-01-03	28	3	0	1	23	1	6	1	0	1	3	1	0	0	0	0	0	0	0	0	0	0	0	0	0	0	0	0	0	0	0	0	0	0	0	0	-5	3	0
2023-01-04	26	5	0	0	20	1	2	0	0	0	2	0	0	0	0	0	0	0	0	0	0	0	0	0	0	0	0	0	0	0	0	0	0	0	0	0	-2	-4	0
2023-01-05	31	4	0	2	23	2	4	0	0	1	3	0	0	0	0	0	0	0	0	0	0	0	0	0	0	0	0	0	0	0	0	0	0	0	0	0	5	2	0
2023-01-06	14	2	1	0	10	1	4	0	1	0	2	1	0	0	0	0	0	0	0	0	0	0	0	0	0	0	0	0	0	0	0	0	0	0	0	0	-17	0	0
2023-01-07	14	3	0	0	9	2	2	1	0	0	1	0	0	0	0	0	0	0	0	0	0	0	0	0	0	0	0	0	0	0	0	0	0	0	0	0	0	-2	0
2023-01-08	14	4	0	1	9	0	5	2	0	1	2	0	0	0	0	0	0	0	0	0	0	0	0	0	0	0	0	0	0	0	0	0	0	0	0	0	0	3	0
2023-01-09	34	7	2	0	24	1	2	1	1	0	0	0	0	0	0	0	0	0	0	0	0	0	0	0	0	0	0	0	0	0	0	0	0	0	0	0	20	-3	0
2023-01-10	23	8	0	0	14	1	2	2	0	0	0	0	0	0	0	0	0	0	0	0	0	0	0	0	0	0	0	0	0	0	0	0	0	0	0	0	-11	0	0
2023-01-11	19	5	1	3	10	0	3	0	0	0	3	0	0	0	0	0	0	0	0	0	0	0	0	0	0	0	0	0	0	0	0	0	0	0	0	0	-4	1	0
2023-01-12	23	7	0	3	13	0	2	1	0	0	1	0	0	0	0	0	0	0	0	0	0	0	0	0	0	0	0	0	0	0	0	0	0	0	0	0	4	-1	0
2023-01-13	16	1	0	1	14	0	2	0	0	0	2	0	0	0	0	0	0	0	0	0	0	0	0	0	0	0	0	0	0	0	0	0	0	0	0	0	-7	0	0
2023-01-14	9	2	0	0	5	2	2	0	0	0	2	0	0	0	0	0	0	0	0	0	0	0	0	0	0	0	0	0	0	0	0	0	0	0	0	0	-7	0	0
2023-01-15	3	2	0	0	1	0	0	0	0	0	0	0	0	0	0	0	0	0	0	0	0	0	0	0	0	0	0	0	0	0	0	0	0	0	0	0	-6	-2	0
2023-01-16	25	7	2	1	15	0	2	0	0	0	2	0	0	0	0	0	0	0	0	0	0	0	0	0	0	0	0	0	0	0	0	0	0	0	0	0	22	2	0
2023-01-17	10	2	0	0	7	1	1	0	0	0	1	0	0	0	0	0	0	0	0	0	0	0	0	0	0	0	0	0	0	0	0	0	0	0	0	0	-15	-1	0
2023-01-18	16	1	1	1	12	1	1	0	0	0	1	0	0	0	0	0	0	0	0	0	0	0	0	0	0	0	0	0	0	0	0	0	0	0	0	0	6	0	0
2023-01-19	12	1	0	0	11	0	2	1	0	0	1	0	0	0	0	0	0	0	0	0	0	0	0	0	0	0	0	0	0	0	0	0	0	0	0	0	-4	1	0
2023-01-20	15	2	1	2	10	0	4	1	1	0	2	0	0	0	0	0	0	0	0	0	0	0	0	0	0	0	0	0	0	0	0	0	0	0	0	0	3	2	0
2023-01-21	12	2	0	0	8	2	3	0	0	0	3	0	0	0	0	0	0	0	0	0	0	0	0	0	0	0	0	0	0	0	0	0	0	0	0	0	-3	-1	0
2023-01-22	6	3	0	0	3	0	0	0	0	0	0	0	0	0	0	0	0	0	0	0	0	0	0	0	0	0	0	0	0	0	0	0	0	0	0	0	-6	-3	0
2023-01-23	18	8	1	0	9	0	3	1	0	0	2	0	0	0	0	0	0	0	0	0	0	0	0	0	0	0	0	0	0	0	0	0	0	0	0	0	12	3	0
2023-01-24	15	2	0	1	10	2	1	0	0	0	1	0	0	0	0	0	0	0	0	0	0	0	0	0	0	0	0	0	0	0	0	0	0	0	0	0	-3	-2	0
2023-01-25	21	2	2	0	16	1	5	1	1	0	3	0	0	0	0	0	0	0	0	0	0	0	0	0	0	0	0	0	0	0	0	0	0	0	0	0	6	4	0
2023-01-26	12	2	3	0	6	1	2	1	0	0	1	0	0	0	0	0	0	0	0	0	0	0	0	0	0	0	0	0	0	0	0	0	0	0	0	0	-9	-3	0
[truncated: 22 more columns]

## Sheet: S4_70-79yo_ASPCAT
Date	Cases						Hospitalizations						Deaths (due to COVID-19)						Deaths in-hospital (due to COVID-19)						Deaths (due to + with COVID-19)						Deaths in-hospital (due to + with COVID-19)						∆Total Cases	∆Total Hosp	∆Total Deaths
	Total	1 - 90 days	91 - 180 days	181 - 270 days	+ 270 days	No vaccine	Total	1 - 90 days	91 - 180 days	181 - 270 days	+ 270 days	No vaccine	Total	1 - 90 days	91 - 180 days	181 - 270 days	+ 270 days	No vaccine	Total	1 - 90 days	91 - 180 days	181 - 270 days	+ 270 days	No vaccine	Total	1 - 90 days	91 - 180 days	181 - 270 days	+ 270 days	No vaccine	Total	1 - 90 days	91 - 180 days	181 - 270 days	+ 270 days	No vaccine
2021-12-05	1	1	0	0	0	0	0	0	0	0	0	0	0	0	0	0	0	0	0	0	0	0	0	0	0	0	0	0	0	0	0	0	0	0	0	0
2021-12-06	8	5	0	3	0	0	2	1	0	1	0	0	0	0	0	0	0	0	0	0	0	0	0	0	0	0	0	0	0	0	0	0	0	0	0	0	7	2	0
2021-12-07	11	0	3	7	0	1	1	0	0	1	0	0	0	0	0	0	0	0	0	0	0	0	0	0	0	0	0	0	0	0	0	0	0	0	0	0	3	-1	0
2021-12-08	14	4	0	9	0	1	1	0	0	1	0	0	0	0	0	0	0	0	0	0	0	0	0	0	0	0	0	0	0	0	0	0	0	0	0	0	3	0	0			CASES					Hosp
2021-12-09	8	1	3	4	0	0	0	0	0	0	0	0	0	0	0	0	0	0	0	0	0	0	0	0	0	0	0	0	0	0	0	0	0	0	0	0	-6	-1	0		variant	1-3 months	4-6 months	7-9 months	10+ months	No vaccine	1-3 months	4-6 months	7-9 months
2021-12-10	15	3	3	7	0	2	1	0	0	1	0	0	0	0	0	0	0	0	0	0	0	0	0	0	0	0	0	0	0	0	0	0	0	0	0	0	7	1	0		BA.1	10360	881	1610	210	958	182	46	99
2021-12-11	8	2	1	4	0	1	0	0	0	0	0	0	0	0	0	0	0	0	0	0	0	0	0	0	0	0	0	0	0	0	0	0	0	0	0	0	-7	-1	0		BA.2	2195	13287	934	910	501	47	299	42
2021-12-12	10	5	1	4	0	0	0	0	0	0	0	0	0	0	0	0	0	0	0	0	0	0	0	0	0	0	0	0	0	0	0	0	0	0	0	0	2	0	0		BA.5	267	4076	19359	2987	844	21	126	703
2021-12-13	14	2	2	9	0	1	1	1	0	0	0	0	0	0	0	0	0	0	0	0	0	0	0	0	0	0	0	0	0	0	0	0	0	0	0	0	4	1	0		BQ.1	1544	119	188	6573	332	142	18	30
2021-12-14	31	9	3	15	0	4	2	0	0	1	0	1	0	0	0	0	0	0	0	0	0	0	0	0	0	0	0	0	0	0	0	0	0	0	0	0	17	1	0		Total	14366	18363	22091	10680	2635	392	489	874
2021-12-15	75	30	11	33	0	1	3	1	0	2	0	0	0	0	0	0	0	0	0	0	0	0	0	0	0	0	0	0	0	0	0	0	0	0	0	0	44	1	0								% Hosp (n>n_min)
2021-12-16	101	40	10	43	0	8	9	3	1	3	0	2	0	0	0	0	0	0	1	1	0	0	0	0	0	0	0	0	0	0	1	1	0	0	0	0	26	6	1							variant	1-3 months	4-6 months	7-9 months
2021-12-17	126	59	7	46	1	13	7	6	0	1	0	0	0	0	0	0	0	0	0	0	0	0	0	0	0	0	0	0	0	0	0	0	0	0	0	0	25	-2	-1			p [%]	d [%]	n_min		BA.1	1.75676	5.22134	6.14907
2021-12-18	59	25	2	24	1	7	2	0	0	2	0	0	0	0	0	0	0	0	0	0	0	0	0	0	0	0	0	0	0	0	0	0	0	0	0	0	-67	-5	0		Hospitalizations	4.10949	2.05474	359		BA.2	2.14123	2.25032	4.49679
2021-12-19	42	25	1	13	0	3	1	1	0	0	0	0	0	0	0	0	0	0	0	0	0	0	0	0	0	0	0	0	0	0	0	0	0	0	0	0	-17	-1	0		Deaths	0.221619	0.110809	6918		BA.5	7.86517	3.09127	3.63139
2021-12-20	113	49	12	44	1	7	7	2	0	5	0	0	1	0	0	0	0	1	0	0	0	0	0	0	3	0	1	1	0	1	0	0	0	0	0	0	71	6	3		Deaths in-hosp	2.64286	1.32143	566		BQ.1	9.19689	15.1261	15.9574
2021-12-21	120	58	9	38	2	13	3	1	0	1	0	1	1	0	0	0	0	1	0	0	0	0	0	0	1	0	0	0	0	1	0	0	0	0	0	0	7	-4	-2								2.72866	2.66296	3.95636
2021-12-22	122	64	5	46	1	6	3	1	0	2	0	0	0	0	0	0	0	0	0	0	0	0	0	0	0	0	0	0	0	0	0	0	0	0	0	0	2	0	-1								% Hosp (n>n_min) Upper B
2021-12-23	95	60	1	23	2	9	5	2	1	1	0	1	0	0	0	0	0	0	0	0	0	0	0	0	0	0	0	0	0	0	0	0	0	0	0	0	-27	2	0								1-3 months	4-6 months	7-9 months
2021-12-24	112	70	3	26	1	12	12	3	0	4	0	5	0	0	0	0	0	0	0	0	0	0	0	0	0	0	0	0	0	0	0	0	0	0	0	0	17	7	0								2.02855	6.90341	7.43568
2021-12-25	56	31	4	17	0	4	4	2	0	1	0	1	0	0	0	0	0	0	0	0	0	0	0	0	0	0	0	0	0	0	0	0	0	0	0	0	-56	-8	0								2.8373	2.51697	6.03001
2021-12-26	48	34	1	9	0	4	5	2	1	1	0	1	0	0	0	0	0	0	1	0	0	1	0	0	0	0	0	0	0	0	1	0	0	1	0	0	-8	1	1								11.7716	3.66964	3.90455
2021-12-27	187	123	10	45	0	9	1	0	0	0	0	1	1	0	0	1	0	0	0	0	0	0	0	0	1	0	0	1	0	0	0	0	0	0	0	0	139	-4	0								10.7494	22.8483	21.9899
2021-12-28	193	122	3	43	1	24	4	0	0	1	0	3	1	1	0	0	0	0	0	0	0	0	0	0	1	1	0	0	0	0	0	0	0	0	0	0	6	3	0								3.00832	2.90618	4.22181
2021-12-29	207	150	5	27	1	24	3	1	0	1	0	1	1	1	0	0	0	0	0	0	0	0	0	0	1	1	0	0	0	0	0	0	0	0	0	0	14	-1	0								% Hosp (n>n_min) Lower B
2021-12-30	208	138	16	31	2	21	6	5	0	0	0	1	0	0	0	0	0	0	0	0	0	0	0	0	0	0	0	0	0	0	0	0	0	0	0	0	1	3	-1								1-3 months	4-6 months	7-9 months
2021-12-31	206	155	2	24	4	21	5	0	0	2	0	3	0	0	0	0	0	0	0	0	0	0	0	0	0	0	0	0	0	0	0	0	0	0	0	0	-2	-1	0								1.51259	3.84769	5.02542
2022-01-01	140	98	6	27	1	8	4	0	1	3	0	0	0	0	0	0	0	0	0	0	0	0	0	0	0	0	0	0	0	0	0	0	0	0	0	0	-66	-1	0								1.57743	2.00488	3.2598
2022-01-02	119	78	6	24	2	9	8	6	0	0	0	2	0	0	0	0	0	0	1	1	0	0	0	0	0	0	0	0	0	0	1	1	0	0	0	0	-21	4	1								4.93444	2.5815	3.37227
2022-01-03	248	183	8	39	1	17	10	3	1	2	0	4	0	0	0	0	0	0	1	0	0	0	0	1	0	0	0	0	0	0	1	0	0	0	0	1	129	2	0								7.80172	9.218	11.0329
2022-01-04	270	204	7	37	1	21	4	1	0	1	0	2	0	0	0	0	0	0	0	0	0	0	0	0	0	0	0	0	0	0	0	0	0	0	0	0	22	-6	-1								2.46838	2.4349	3.70312
2022-01-05	245	186	3	34	0	22	7	3	0	3	0	1	0	0	0	0	0	0	0	0	0	0	0	0	1	0	0	1	0	0	1	0	0	1	0	0	-25	3	2
2022-01-06	131	93	1	16	1	20	7	2	0	1	0	4	0	0	0	0	0	0	1	0	0	0	0	1	0	0	0	0	0	0	2	0	0	1	0	1	-114	0	0								1-3 months	4-6 months	7-9 months
2022-01-07	276	207	4	38	3	24	13	5	0	4	0	4	0	0	0	0	0	0	1	0	0	0	0	1	0	0	0	0	0	0	3	0	0	1	0	2	145	6	1						BA.1	1-3 months
2022-01-08	166	118	4	23	2	19	7	1	0	3	0	3	0	0	0	0	0	0	1	0	0	0	0	1	0	0	0	0	0	0	1	0	0	0	0	1	-110	-6	-2							4-6 months	1e-09
2022-01-09	164	122	6	22	1	13	9	3	0	3	0	3	0	0	0	0	0	0	3	0	0	0	0	3	0	0	0	0	0	0	3	0	0	0	0	3	-2	2	2							7-9 months	1e-21	0.3715
2022-01-10	273	202	11	34	0	26	2	0	1	1	0	0	2	1	0	1	0	0	0	0	0	0	0	0	2	1	0	1	0	0	0	0	0	0	0	0	109	-7	-1							10+ months	0.014	0.7257	0.3514
2022-01-11	300	219	7	47	2	25	11	5	0	3	0	3	0	0	0	0	0	0	2	1	0	1	0	0	0	0	0	0	0	0	2	1	0	1	0	0	27	9	0							No vaccine	1e-44	1e-06	1e-06
2022-01-12	336	256	11	44	2	23	8	2	1	3	0	2	0	0	0	0	0	0	0	0	0	0	0	0	0	0	0	0	0	0	0	0	0	0	0	0	36	-3	-2						BA.2	1-3 months
2022-01-13	307	239	7	33	3	25	8	1	2	2	0	3	0	0	0	0	0	0	2	0	1	1	0	0	0	0	0	0	0	0	2	0	1	1	0	0	-29	0	2							4-6 months	0.8152
2022-01-14	253	203	9	23	3	15	7	1	1	3	0	2	0	0	0	0	0	0	0	0	0	0	0	0	0	0	0	0	0	0	0	0	0	0	0	0	-54	-1	-2							7-9 months	0.0005	1e-05
2022-01-15	219	171	10	22	3	13	7	5	0	1	0	1	0	0	0	0	0	0	1	0	0	1	0	0	0	0	0	0	0	0	1	0	0	1	0	0	-34	0	1							10+ months	1e-06	1e-08	0.3375
2022-01-16	174	145	4	11	3	11	9	5	1	0	0	3	0	0	0	0	0	0	0	0	0	0	0	0	0	0	0	0	0	0	0	0	0	0	0	0	-45	2	-1							No vaccine	1e-09	1e-11	0.0084
2022-01-17	374	295	7	41	6	25	7	3	0	2	0	2	1	0	1	0	0	0	1	1	0	0	0	0	1	0	1	0	0	0	2	2	0	0	0	0	200	-2	3						BA.5	1-3 months
2022-01-18	355	274	11	43	3	24	11	6	1	2	1	1	0	0	0	0	0	0	0	0	0	0	0	0	2	1	0	1	0	0	0	0	0	0	0	0	-19	4	-1							4-6 months	0.0001
2022-01-19	378	305	9	44	0	20	14	9	1	3	0	1	0	0	0	0	0	0	0	0	0	0	0	0	0	0	0	0	0	0	0	0	0	0	0	0	23	3	-2							7-9 months	0.0014	0.0931
2022-01-20	287	228	7	36	0	16	10	4	1	2	0	3	0	0	0	0	0	0	1	0	0	0	0	1	0	0	0	0	0	0	1	0	0	0	0	1	-91	-4	1							10+ months	0.2913	1e-10	1e-10
2022-01-21	342	275	10	27	1	29	7	4	1	1	0	1	0	0	0	0	0	0	1	0	1	0	0	0	0	0	0	0	0	0	1	0	1	0	0	0	55	-3	0							No vaccine	0.6896	1e-07	1e-06
2022-01-22	234	191	7	21	1	14	7	3	0	2	0	2	0	0	0	0	0	0	1	0	0	0	0	1	1	1	0	0	0	0	1	0	0	0	0	1	-108	0	1						BQ.1	1-3 months
2022-01-23	236	189	9	19	2	17	6	4	0	2	0	0	0	0	0	0	0	0	1	1	0	0	0	0	0	0	0	0	0	0	1	1	0	0	0	0	2	-1	-1							4-6 months	0.0506
2022-01-24	455	372	9	46	5	23	11	7	0	3	0	1	0	0	0	0	0	0	0	0	0	0	0	0	0	0	0	0	0	0	0	0	0	0	0	0	219	5	-1							7-9 months	0.0063	0.8735
2022-01-25	388	305	17	32	8	26	10	4	0	4	0	2	0	0	0	0	0	0	0	0	0	0	0	0	0	0	0	0	0	0	0	0	0	0	0	0	-67	-1	0							10+ months	0.1835	0.0107	0.0001
2022-01-26	357	292	14	27	6	18	8	6	0	0	1	1	0	0	0	0	0	0	2	2	0	0	0	0	0	0	0	0	0	0	2	2	0	0	0	0	-31	-2	2							No vaccine	1e-05	0.6686	0.807
2022-01-27	359	277	22	28	2	30	10	1	2	0	0	7	0	0	0	0	0	0	1	1	0	0	0	0	2	1	1	0	0	0	1	1	0	0	0	0	2	2	1						Total	1-3 months
2022-01-28	302	241	15	22	5	19	14	6	2	1	0	5	0	0	0	0	0	0	1	0	0	0	0	1	0	0	0	0	0	0	1	0	0	0	0	1	-57	4	-2							4-6 months	0.7308
2022-01-29	231	189	11	15	5	11	6	3	0	0	0	3	0	0	0	0	0	0	0	0	0	0	0	0	0	0	0	0	0	0	1	0	0	0	0	1	-71	-8	0							7-9 months	1e-10	1e-13
2022-01-30	164	128	10	13	3	10	3	0	1	0	1	1	0	0	0	0	0	0	0	0	0	0	0	0	0	0	0	0	0	0	0	0	0	0	0	0	-67	-3	-1							10+ months	1e-63	1e-73	1e-36
2022-01-31	400	321	19	26	11	23	6	4	0	0	2	0	0	0	0	0	0	0	0	0	0	0	0	0	1	0	0	0	1	0	0	0	0	0	0	0	236	3	1							No vaccine	1e-56	1e-61	1e-37
2022-02-01	305	243	19	22	10	11	8	5	1	1	0	1	0	0	0	0	0	0	1	0	0	1	0	0	0	0	0	0	0	0	1	0	0	1	0	0	-95	2	0
2022-02-02	290	216	32	14	10	18	8	2	3	1	0	2	0	0	0	0	0	0	0	0	0	0	0	0	2	1	1	0	0	0	0	0	0	0	0	0	-15	0	1								1-3 months	4-6 months	7-9 months
2022-02-03	284	223	21	12	9	19	7	3	0	2	0	2	0	0	0	0	0	0	1	1	0	0	0	0	0	0	0	0	0	0	1	1	0	0	0	0	-6	-1	-1						BA.1	1-RR	84.5599	54.1097	45.9559
2022-02-04	331	244	43	16	8	20	14	8	2	1	1	2	0	0	0	0	0	0	1	1	0	0	0	0	0	0	0	0	0	0	1	1	0	0	0	0	47	7	0							err pos (1-RR)	3.80529	17.2065	15.3416
2022-02-05	199	146	21	14	5	13	6	3	1	0	0	2	0	0	0	0	0	0	0	0	0	0	0	0	0	0	0	0	0	0	0	0	0	0	0	0	-132	-8	-1							err neg (1-RR)	3.39842	14.3909	13.5131
2022-02-06	163	122	12	14	6	9	9	3	0	4	0	2	0	0	0	0	0	0	0	0	0	0	0	0	0	0	0	0	0	0	0	0	0	0	0	0	-36	3	0
2022-02-07	289	203	44	17	6	19	7	4	2	0	0	1	1	0	0	0	1	0	0	0	0	0	0	0	1	0	0	0	1	0	0	0	0	0	0	0	126	-2	1						BA.2	1-RR	73.1811	71.8147	43.6777
2022-02-08	269	207	35	9	9	9	6	3	1	1	0	1	0	0	0	0	0	0	0	0	0	0	0	0	0	0	0	0	0	0	0	0	0	0	0	0	-20	-1	-1							err pos (1-RR)	12.6517	10.1978	27.1939
2022-02-09	278	202	46	14	5	11	4	1	1	1	1	0	0	0	0	0	0	0	0	0	0	0	0	0	0	0	0	0	0	0	0	0	0	0	0	0	9	-2	0							err neg (1-RR)	10.2678	8.4154	22.0249
2022-02-10	270	197	44	13	5	11	8	4	2	0	1	1	0	0	0	0	0	0	0	0	0	0	0	0	0	0	0	0	0	0	0	0	0	0	0	0	-8	4	0
2022-02-11	266	159	62	15	19	11	12	2	4	1	1	4	0	0	0	0	0	0	0	0	0	0	0	0	0	0	0	0	0	0	0	0	0	0	0	0	-4	4	0						BA.5	1-RR	-8.82299	57.229	49.7559
2022-02-12	125	79	26	8	6	6	7	2	3	1	0	1	0	0	0	0	0	0	0	0	0	0	0	0	0	0	0	0	0	0	0	0	0	0	0	0	-141	-5	0							err pos (1-RR)	61.5812	14.0917	14.1401
2022-02-13	131	97	18	7	3	6	5	1	2	1	0	1	0	0	0	0	0	0	1	0	0	1	0	0	0	0	0	0	0	0	1	0	0	1	0	0	6	-2	1							err neg (1-RR)	47.5887	12.0658	12.046
2022-02-14	252	162	65	14	6	5	9	3	4	1	0	1	0	0	0	0	0	0	0	0	0	0	0	0	0	0	0	0	0	0	0	0	0	0	0	0	121	4	-1
2022-02-15	219	142	51	11	3	12	5	0	4	1	0	0	0	0	0	0	0	0	0	0	0	0	0	0	0	0	0	0	0	0	0	0	0	0	0	0	-33	-4	0						BQ.1	1-RR	46.4321	11.8974	7.05487
2022-02-16	191	116	49	7	8	11	6	1	3	1	0	1	0	0	0	0	0	0	0	0	0	0	0	0	0	0	0	0	0	0	0	0	0	0	0	0	-28	1	0							err pos (1-RR)	16.6889	50.5499	42.7422
2022-02-17	196	121	55	4	10	6	10	3	5	0	0	2	0	0	0	0	0	0	0	0	0	0	0	0	0	0	0	0	0	0	0	0	0	0	0	0	5	4	0							err neg (1-RR)	14.6278	39.8038	35.6107
2022-02-18	197	109	65	6	10	7	6	2	4	0	0	0	0	0	0	0	0	0	0	0	0	0	0	0	0	0	0	0	0	0	0	0	0	0	0	0	1	-4	0
2022-02-19	95	65	20	3	3	4	5	1	3	0	0	1	0	0	0	0	0	0	1	0	0	1	0	0	1	0	1	0	0	0	0	0	0	0	0	0	-102	-1	1						Total	1-RR	73.071	73.7194	60.955
2022-02-20	103	65	27	4	4	3	5	0	3	0	1	1	0	0	0	0	0	0	0	0	0	0	0	0	0	0	0	0	0	0	0	0	0	0	0	0	8	0	-1							err pos (1-RR)	4.24939	3.96296	5.36763
2022-02-21	186	107	53	9	8	9	12	4	4	0	2	2	0	0	0	0	0	0	0	0	0	0	0	0	0	0	0	0	0	0	0	0	0	0	0	0	83	7	0							err neg (1-RR)	4.24939	3.96296	5.36763
2022-02-22	163	93	49	4	10	7	1	0	1	0	0	0	0	0	0	0	0	0	0	0	0	0	0	0	0	0	0	0	0	0	0	0	0	0	0	0	-23	-11	0
2022-02-23	171	74	75	4	11	7	2	0	1	1	0	0	0	0	0	0	0	0	0	0	0	0	0	0	0	0	0	0	0	0	0	0	0	0	0	0	8	1	0
2022-02-24	166	75	71	2	14	4	3	2	1	0	0	0	0	0	0	0	0	0	0	0	0	0	0	0	0	0	0	0	0	0	0	0	0	0	0	0	-5	1	0							Average numbers
2022-02-25	178	87	72	3	9	7	3	1	0	0	0	2	0	0	0	0	0	0	0	0	0	0	0	0	0	0	0	0	0	0	0	0	0	0	0	0	12	0	0							Cases	Hosp	Deaths (due to + with)	in-Hosp Deaths (due to + with)
2022-02-26	113	55	49	2	2	5	4	0	3	0	0	1	0	0	0	0	0	0	0	0	0	0	0	0	0	0	0	0	0	0	0	0	0	0	0	0	-65	1	0						BA.1 emerg	117.407	4.33333	0.481481	0.185185
2022-02-27	83	35	44	1	3	0	4	1	3	0	0	0	0	0	0	0	0	0	0	0	0	0	0	0	0	0	0	0	0	0	0	0	0	0	0	0	-30	0	0						BA.1 dom	281.971	8.2	1.14286	0.8
2022-02-28	178	68	89	4	12	5	4	2	1	0	1	0	1	0	1	0	0	0	0	0	0	0	0	0	1	0	1	0	0	0	0	0	0	0	0	0	95	0	1						BA.2 emerg	171.184	5.25	0.408163	0.183673
2022-03-01	134	52	65	1	10	6	2	2	0	0	0	0	0	0	0	0	0	0	0	0	0	0	0	0	0	0	0	0	0	0	0	0	0	0	0	0	-44	-2	-1						BA.2 dom	217.63	5.21154	0.354167	0.166667
2022-03-02	175	66	93	2	12	2	3	1	2	0	0	0	0	0	0	0	0	0	1	1	0	0	0	0	0	0	0	0	0	0	1	1	0	0	0	0	41	1	1						BA.5 emerg	321.179	12.0128	0.525641	0.192308
2022-03-03	178	63	100	3	8	4	4	1	2	0	1	0	0	0	0	0	0	0	0	0	0	0	0	0	0	0	0	0	0	0	0	0	0	0	0	0	3	1	-1						BA.5 dom	53.6909	3.09091	0.2	0.0909091
2022-03-04	148	50	85	4	4	5	6	2	2	0	1	1	0	0	0	0	0	0	0	0	0	0	0	0	2	0	0	2	0	0	0	0	0	0	0	0	-30	2	2						BQ.1 emerg	92.64	6.65333	0.0933333	0.04
2022-03-05	106	28	66	2	5	5	6	1	4	0	1	0	1	0	0	0	1	0	0	0	0	0	0	0	2	0	0	0	1	1	0	0	0	0	0	0	-42	0	0						BQ.1 dom	37.6667	5.89583	0.0416667	0.0208333
2022-03-06	81	23	49	4	3	2	7	2	5	0	0	0	0	0	0	0	0	0	0	0	0	0	0	0	0	0	0	0	0	0	0	0	0	0	0	0	-25	1	-2								∆Total Cases	∆Total Hosp	∆Total Deaths
2022-03-07	224	54	151	2	8	9	3	1	1	0	0	1	0	0	0	0	0	0	0	0	0	0	0	0	0	0	0	0	0	0	0	0	0	0	0	0	143	-4	0
2022-03-08	180	52	116	1	8	3	3	0	2	0	1	0	0	0	0	0	0	0	1	0	1	0	0	0	1	1	0	0	0	0	1	0	1	0	0	0	-44	0	2							BA.1 emerg	8.77778	0.259259	0.0740741
2022-03-09	196	40	133	2	13	8	3	0	3	0	0	0	0	0	0	0	0	0	0	0	0	0	0	0	0	0	0	0	0	0	1	0	1	0	0	0	16	0	-1							BA.1 dom	0.942857	-0.0857143	-0.0571429
2022-03-10	188	45	128	2	9	4	4	1	2	0	0	1	0	0	0	0	0	0	0	0	0	0	0	0	0	0	0	0	0	0	0	0	0	0	0	0	-8	1	-1							BA.2 emerg	-3.46939	-0.1	0
2022-03-11	188	43	131	2	8	4	0	0	0	0	0	0	0	0	0	0	0	0	0	0	0	0	0	0	1	0	1	0	0	0	0	0	0	0	0	0	0	-4	1							BA.2 dom	1.23913	0	0.0217391
2022-03-12	94	23	62	1	7	1	1	1	0	0	0	0	0	0	0	0	0	0	1	0	1	0	0	0	0	0	0	0	0	0	0	0	0	0	0	0	-94	1	-1							BA.5 emerg	-0.0384615	0.115385	-0.0128205
2022-03-13	137	23	106	1	7	0	6	0	6	0	0	0	0	0	0	0	0	0	0	0	0	0	0	0	0	0	0	0	0	0	0	0	0	0	0	0	43	5	0							BA.5 dom	-2.56364	-0.236364	0
2022-03-14	261	38	195	5	15	8	4	2	1	0	0	1	0	0	0	0	0	0	0	0	0	0	0	0	0	0	0	0	0	0	0	0	0	0	0	0	124	-2	0							BQ.1 emerg	1.33333	0.2	0
2022-03-15	208	32	157	3	11	5	10	0	9	0	1	0	0	0	0	0	0	0	0	0	0	0	0	0	0	0	0	0	0	0	2	0	1	1	0	0	-53	6	2							BQ.1 dom	-2.25	-0.25	0
2022-03-16	237	31	183	2	13	8	7	0	4	0	1	2	1	0	1	0	0	0	1	0	1	0	0	0	1	0	1	0	0	0	1	0	1	0	0	0	29	-3	0
2022-03-17	222	24	181	1	7	9	6	0	5	0	0	1	0	0	0	0	0	0	0	0	0	0	0	0	0	0	0	0	0	0	0	0	0	0	0	0	-15	-1	-2
2022-03-18	213	25	175	0	8	5	6	0	6	0	0	0	0	0	0	0	0	0	0	0	0	0	0	0	0	0	0	0	0	0	0	0	0	0	0	0	-9	0	0
2022-03-19	119	10	96	1	8	4	4	0	3	1	0	0	0	0	0	0	0	0	0	0	0	0	0	0	0	0	0	0	0	0	0	0	0	0	0	0	-94	-2	0
2022-03-20	119	16	90	1	7	5	3	0	2	0	0	1	0	0	0	0	0	0	0	0	0	0	0	0	0	0	0	0	0	0	0	0	0	0	0	0	0	-1	0
2022-03-21	250	15	207	2	17	9	4	0	3	0	1	0	0	0	0	0	0	0	1	0	0	0	1	0	0	0	0	0	0	0	1	0	0	0	1	0	131	1	1
2022-03-22	238	9	210	3	13	3	4	0	2	0	0	2	0	0	0	0	0	0	0	0	0	0	0	0	0	0	0	0	0	0	0	0	0	0	0	0	-12	0	-1
2022-03-23	198	14	168	2	8	6	2	0	2	0	0	0	0	0	0	0	0	0	0	0	0	0	0	0	0	0	0	0	0	0	0	0	0	0	0	0	-40	-2	0
2022-03-24	207	12	173	5	11	6	5	0	3	1	1	0	0	0	0	0	0	0	1	0	1	0	0	0	1	0	1	0	0	0	1	0	1	0	0	0	9	3	2
2022-03-25	203	12	173	1	11	6	3	0	3	0	0	0	0	0	0	0	0	0	0	0	0	0	0	0	0	0	0	0	0	0	0	0	0	0	0	0	-4	-2	-2
2022-03-26	93	5	81	0	5	2	2	0	2	0	0	0	1	0	1	0	0	0	0	0	0	0	0	0	1	0	1	0	0	0	0	0	0	0	0	0	-110	-1	1
2022-03-27	71	5	58	0	4	4	5	0	4	0	1	0	0	0	0	0	0	0	0	0	0	0	0	0	0	0	0	0	0	0	0	0	0	0	0	0	-22	3	-1
2022-03-28	177	9	151	4	4	9	7	1	6	0	0	0	0	0	0	0	0	0	0	0	0	0	0	0	0	0	0	0	0	0	0	0	0	0	0	0	106	2	0
2022-03-29	152	8	133	1	6	4	4	0	2	0	1	1	0	0	0	0	0	0	0	0	0	0	0	0	0	0	0	0	0	0	0	0	0	0	0	0	-25	-3	0
2022-03-30	108	2	93	1	10	2	4	1	2	0	1	0	0	0	0	0	0	0	0	0	0	0	0	0	0	0	0	0	0	0	0	0	0	0	0	0	-44	0	0
2022-03-31	121	5	106	2	4	4	2	0	2	0	0	0	0	0	0	0	0	0	0	0	0	0	0	0	0	0	0	0	0	0	0	0	0	0	0	0	13	-2	0
2022-04-01	120	5	107	0	7	1	5	0	4	0	1	0	0	0	0	0	0	0	0	0	0	0	0	0	0	0	0	0	0	0	0	0	0	0	0	0	-1	3	0
2022-04-02	69	4	60	1	3	1	2	0	0	0	1	1	0	0	0	0	0	0	0	0	0	0	0	0	0	0	0	0	0	0	0	0	0	0	0	0	-51	-3	0
2022-04-03	63	2	54	1	4	2	3	0	2	1	0	0	0	0	0	0	0	0	0	0	0	0	0	0	0	0	0	0	0	0	0	0	0	0	0	0	-6	1	0
2022-04-04	196	5	172	5	12	2	6	0	3	1	2	0	0	0	0	0	0	0	0	0	0	0	0	0	0	0	0	0	0	0	0	0	0	0	0	0	133	3	0
2022-04-05	189	2	167	5	10	5	5	0	3	1	1	0	0	0	0	0	0	0	0	0	0	0	0	0	0	0	0	0	0	0	0	0	0	0	0	0	-7	-1	0
2022-04-06	157	6	140	0	5	6	4	1	3	0	0	0	0	0	0	0	0	0	0	0	0	0	0	0	0	0	0	0	0	0	0	0	0	0	0	0	-32	-1	0
2022-04-07	174	7	153	3	9	2	4	1	3	0	0	0	0	0	0	0	0	0	0	0	0	0	0	0	0	0	0	0	0	0	0	0	0	0	0	0	17	0	0
2022-04-08	192	7	164	2	13	6	3	1	2	0	0	0	0	0	0	0	0	0	0	0	0	0	0	0	0	0	0	0	0	0	0	0	0	0	0	0	18	-1	0
2022-04-09	96	5	78	2	6	5	11	0	6	2	2	1	0	0	0	0	0	0	0	0	0	0	0	0	0	0	0	0	0	0	0	0	0	0	0	0	-96	8	0
2022-04-10	82	2	73	0	5	2	3	0	2	0	1	0	0	0	0	0	0	0	0	0	0	0	0	0	0	0	0	0	0	0	0	0	0	0	0	0	-14	-8	0
2022-04-11	259	8	226	4	14	7	7	0	4	1	1	1	0	0	0	0	0	0	0	0	0	0	0	0	0	0	0	0	0	0	0	0	0	0	0	0	177	4	0
2022-04-12	230	5	197	3	16	9	9	0	6	0	2	1	0	0	0	0	0	0	1	0	0	0	1	0	0	0	0	0	0	0	2	0	1	0	1	0	-29	2	2
2022-04-13	186	4	162	4	13	3	2	0	1	0	0	1	0	0	0	0	0	0	0	0	0	0	0	0	1	1	0	0	0	0	0	0	0	0	0	0	-44	-7	-1
2022-04-14	193	3	174	4	10	2	4	0	2	0	1	1	0	0	0	0	0	0	0	0	0	0	0	0	0	0	0	0	0	0	0	0	0	0	0	0	7	2	-1
2022-04-15	83	1	79	0	2	1	7	0	6	0	1	0	0	0	0	0	0	0	0	0	0	0	0	0	0	0	0	0	0	0	1	0	1	0	0	0	-110	3	1
2022-04-16	115	1	100	1	9	4	6	1	3	0	2	0	0	0	0	0	0	0	0	0	0	0	0	0	0	0	0	0	0	0	0	0	0	0	0	0	32	-1	-1
2022-04-17	88	1	81	2	4	0	2	0	1	0	1	0	0	0	0	0	0	0	0	0	0	0	0	0	0	0	0	0	0	0	0	0	0	0	0	0	-27	-4	0
2022-04-18	98	0	82	3	7	6	6	0	4	0	0	2	0	0	0	0	0	0	0	0	0	0	0	0	0	0	0	0	0	0	0	0	0	0	0	0	10	4	0
2022-04-19	290	5	260	6	15	4	6	2	2	0	2	0	0	0	0	0	0	0	0	0	0	0	0	0	0	0	0	0	0	0	0	0	0	0	0	0	192	0	0
2022-04-20	224	6	198	6	9	5	2	0	1	1	0	0	1	0	1	0	0	0	0	0	0	0	0	0	1	0	1	0	0	0	0	0	0	0	0	0	-66	-4	1
2022-04-21	226	1	200	3	13	9	10	0	7	1	0	2	0	0	0	0	0	0	0	0	0	0	0	0	0	0	0	0	0	0	0	0	0	0	0	0	2	8	-1
2022-04-22	270	5	232	7	21	5	4	0	2	0	1	1	0	0	0	0	0	0	0	0	0	0	0	0	1	0	1	0	0	0	0	0	0	0	0	0	44	-6	1
2022-04-23	105	2	95	1	3	4	2	0	1	0	1	0	0	0	0	0	0	0	0	0	0	0	0	0	0	0	0	0	0	0	0	0	0	0	0	0	-165	-2	-1
2022-04-24	97	2	85	3	6	1	3	0	1	1	1	0	0	0	0	0	0	0	0	0	0	0	0	0	0	0	0	0	0	0	0	0	0	0	0	0	-8	1	0
2022-04-25	301	4	264	12	16	5	4	0	4	0	0	0	0	0	0	0	0	0	0	0	0	0	0	0	0	0	0	0	0	0	1	0	1	0	0	0	204	1	1
2022-04-26	291	3	264	10	10	4	10	1	7	1	1	0	0	0	0	0	0	0	1	0	1	0	0	0	0	0	0	0	0	0	1	0	1	0	0	0	-10	6	0
2022-04-27	278	5	240	9	12	12	6	0	3	1	2	0	0	0	0	0	0	0	0	0	0	0	0	0	0	0	0	0	0	0	0	0	0	0	0	0	-13	-4	-1
2022-04-28	311	3	281	10	11	6	9	0	6	1	2	0	0	0	0	0	0	0	0	0	0	0	0	0	1	0	1	0	0	0	0	0	0	0	0	0	33	3	1
2022-04-29	284	5	244	10	18	7	7	0	5	0	2	0	1	0	1	0	0	0	0	0	0	0	0	0	1	0	1	0	0	0	0	0	0	0	0	0	-27	-2	0
2022-04-30	157	1	138	6	3	9	9	0	8	0	0	1	0	0	0	0	0	0	0	0	0	0	0	0	0	0	0	0	0	0	0	0	0	0	0	0	-127	2	-1
2022-05-01	117	0	107	4	4	2	3	0	3	0	0	0	0	0	0	0	0	0	1	0	1	0	0	0	0	0	0	0	0	0	1	0	1	0	0	0	-40	-6	1
2022-05-02	386	1	330	22	24	9	6	0	5	1	0	0	0	0	0	0	0	0	0	0	0	0	0	0	0	0	0	0	0	0	0	0	0	0	0	0	269	3	-1
2022-05-03	330	5	289	19	10	7	11	1	9	1	0	0	0	0	0	0	0	0	0	0	0	0	0	0	1	0	1	0	0	0	0	0	0	0	0	0	-56	5	1
2022-05-04	299	3	252	13	22	9	4	0	4	0	0	0	0	0	0	0	0	0	0	0	0	0	0	0	0	0	0	0	0	0	0	0	0	0	0	0	-31	-7	-1
2022-05-05	342	4	290	30	10	8	9	1	6	1	0	1	0	0	0	0	0	0	0	0	0	0	0	0	0	0	0	0	0	0	0	0	0	0	0	0	43	5	0
2022-05-06	354	8	284	41	17	4	5	2	3	0	0	0	0	0	0	0	0	0	0	0	0	0	0	0	0	0	0	0	0	0	0	0	0	0	0	0	12	-4	0
2022-05-07	172	1	134	22	9	6	4	1	1	2	0	0	0	0	0	0	0	0	0	0	0	0	0	0	0	0	0	0	0	0	0	0	0	0	0	0	-182	-1	0
2022-05-08	141	0	111	15	12	3	9	0	6	2	1	0	0	0	0	0	0	0	0	0	0	0	0	0	0	0	0	0	0	0	0	0	0	0	0	0	-31	5	0
2022-05-09	425	2	331	62	17	13	7	1	4	2	0	0	0	0	0	0	0	0	0	0	0	0	0	0	0	0	0	0	0	0	0	0	0	0	0	0	284	-2	0
2022-05-10	414	2	316	62	21	13	7	0	3	2	1	1	0	0	0	0	0	0	0	0	0	0	0	0	1	0	1	0	0	0	0	0	0	0	0	0	-11	0	1
2022-05-11	362	2	269	66	19	6	9	0	3	5	0	1	1	0	0	1	0	0	0	0	0	0	0	0	1	0	0	1	0	0	0	0	0	0	0	0	-52	2	0
2022-05-12	382	2	270	90	13	7	8	0	4	1	3	0	0	0	0	0	0	0	1	0	1	0	0	0	0	0	0	0	0	0	0	0	0	0	0	0	20	-1	-1
2022-05-13	409	4	296	75	20	14	13	0	5	4	2	2	0	0	0	0	0	0	2	0	1	0	0	1	1	0	1	0	0	0	1	0	0	0	0	1	27	5	2
2022-05-14	168	3	121	29	11	4	6	1	4	1	0	0	0	0	0	0	0	0	0	0	0	0	0	0	0	0	0	0	0	0	0	0	0	0	0	0	-241	-7	-2
2022-05-15	165	1	117	26	16	5	4	0	4	0	0	0	0	0	0	0	0	0	1	0	1	0	0	0	0	0	0	0	0	0	1	0	1	0	0	0	-3	-2	1
2022-05-16	472	1	316	110	28	17	12	0	7	3	0	2	0	0	0	0	0	0	0	0	0	0	0	0	0	0	0	0	0	0	0	0	0	0	0	0	307	8	-1
2022-05-17	374	6	229	111	18	10	8	0	6	1	1	0	0	0	0	0	0	0	0	0	0	0	0	0	0	0	0	0	0	0	0	0	0	0	0	0	-98	-4	0
2022-05-18	330	1	197	98	23	11	13	0	9	2	1	1	0	0	0	0	0	0	0	0	0	0	0	0	1	0	0	1	0	0	0	0	0	0	0	0	-44	5	1
2022-05-19	345	3	201	111	20	10	6	0	2	3	0	1	0	0	0	0	0	0	0	0	0	0	0	0	0	0	0	0	0	0	0	0	0	0	0	0	15	-7	-1
2022-05-20	299	2	176	98	15	8	9	0	6	2	1	0	0	0	0	0	0	0	0	0	0	0	0	0	0	0	0	0	0	0	0	0	0	0	0	0	-46	3	0
2022-05-21	156	2	89	45	14	6	4	0	2	1	0	1	1	0	1	0	0	0	0	0	0	0	0	0	1	0	1	0	0	0	0	0	0	0	0	0	-143	-5	1
2022-05-22	112	0	48	50	10	4	7	0	1	4	2	0	0	0	0	0	0	0	0	0	0	0	0	0	0	0	0	0	0	0	0	0	0	0	0	0	-44	3	-1
2022-05-23	394	3	206	150	20	15	13	0	4	5	1	3	0	0	0	0	0	0	0	0	0	0	0	0	1	0	0	0	1	0	0	0	0	0	0	0	282	6	1
2022-05-24	272	6	153	95	12	6	4	0	1	1	0	2	0	0	0	0	0	0	0	0	0	0	0	0	0	0	0	0	0	0	0	0	0	0	0	0	-122	-9	-1
2022-05-25	314	3	158	134	12	7	10	0	7	1	2	0	0	0	0	0	0	0	0	0	0	0	0	0	0	0	0	0	0	0	0	0	0	0	0	0	42	6	0
2022-05-26	300	4	139	141	8	8	11	0	4	7	0	0	0	0	0	0	0	0	0	0	0	0	0	0	0	0	0	0	0	0	0	0	0	0	0	0	-14	1	0
2022-05-27	298	4	126	149	12	7	6	0	3	2	0	1	0	0	0	0	0	0	1	0	1	0	0	0	0	0	0	0	0	0	1	0	1	0	0	0	-2	-5	1
2022-05-28	140	0	65	58	9	8	8	0	3	2	2	1	0	0	0	0	0	0	0	0	0	0	0	0	0	0	0	0	0	0	0	0	0	0	0	0	-158	2	-1
2022-05-29	120	0	48	62	7	3	10	0	5	3	1	1	0	0	0	0	0	0	0	0	0	0	0	0	1	0	0	0	1	0	0	0	0	0	0	0	-20	2	1
2022-05-30	434	5	187	209	24	9	7	0	3	2	0	2	0	0	0	0	0	0	0	0	0	0	0	0	0	0	0	0	0	0	0	0	0	0	0	0	314	-3	-1
2022-05-31	335	5	137	174	10	9	8	1	1	3	1	2	0	0	0	0	0	0	0	0	0	0	0	0	0	0	0	0	0	0	0	0	0	0	0	0	-99	1	0
2022-06-01	315	4	112	180	14	5	5	0	0	3	1	1	0	0	0	0	0	0	0	0	0	0	0	0	1	0	0	1	0	0	0	0	0	0	0	0	-20	-3	1
2022-06-02	316	5	91	194	17	9	12	0	4	7	1	0	0	0	0	0	0	0	0	0	0	0	0	0	1	0	0	1	0	0	0	0	0	0	0	0	1	7	0
2022-06-03	313	4	106	186	10	7	13	0	3	7	2	1	0	0	0	0	0	0	0	0	0	0	0	0	0	0	0	0	0	0	0	0	0	0	0	0	-3	1	-1
2022-06-04	130	0	33	86	7	4	10	0	4	6	0	0	0	0	0	0	0	0	0	0	0	0	0	0	0	0	0	0	0	0	0	0	0	0	0	0	-183	-3	0
2022-06-05	141	0	48	83	9	1	8	0	3	4	1	0	0	0	0	0	0	0	0	0	0	0	0	0	0	0	0	0	0	0	0	0	0	0	0	0	11	-2	0
2022-06-06	183	3	45	128	6	1	14	0	3	11	0	0	0	0	0	0	0	0	0	0	0	0	0	0	0	0	0	0	0	0	0	0	0	0	0	0	42	6	0
2022-06-07	523	1	141	334	33	14	9	0	2	4	1	2	0	0	0	0	0	0	0	0	0	0	0	0	0	0	0	0	0	0	0	0	0	0	0	0	340	-5	0
2022-06-08	364	4	99	227	26	8	6	0	1	3	1	1	1	0	0	1	0	0	0	0	0	0	0	0	1	0	0	1	0	0	0	0	0	0	0	0	-159	-3	1
2022-06-09	346	3	81	240	15	7	7	0	2	4	1	0	0	0	0	0	0	0	0	0	0	0	0	0	0	0	0	0	0	0	0	0	0	0	0	0	-18	1	-1
2022-06-10	339	6	90	217	15	11	8	0	1	5	2	0	0	0	0	0	0	0	0	0	0	0	0	0	0	0	0	0	0	0	0	0	0	0	0	0	-7	1	0
2022-06-11	164	1	36	111	8	8	7	0	1	5	1	0	0	0	0	0	0	0	0	0	0	0	0	0	0	0	0	0	0	0	0	0	0	0	0	0	-175	-1	0
2022-06-12	146	1	24	109	10	2	6	1	1	4	0	0	0	0	0	0	0	0	1	0	0	1	0	0	1	0	0	1	0	0	1	0	0	1	0	0	-18	-1	2
2022-06-13	431	3	97	295	24	12	13	0	4	6	1	2	0	0	0	0	0	0	1	0	0	0	0	1	1	0	0	1	0	0	1	0	0	0	0	1	285	7	0
2022-06-14	396	8	56	310	16	6	12	0	2	8	1	1	0	0	0	0	0	0	0	0	0	0	0	0	1	0	0	1	0	0	0	0	0	0	0	0	-35	-1	-1
2022-06-15	421	3	56	326	23	13	12	0	1	10	1	0	0	0	0	0	0	0	0	0	0	0	0	0	0	0	0	0	0	0	1	0	0	1	0	0	25	0	0
2022-06-16	375	4	53	282	25	11	9	0	2	6	1	0	0	0	0	0	0	0	0	0	0	0	0	0	0	0	0	0	0	0	1	0	0	1	0	0	-46	-3	0
2022-06-17	397	3	41	325	17	11	12	0	1	11	0	0	0	0	0	0	0	0	0	0	0	0	0	0	0	0	0	0	0	0	0	0	0	0	0	0	22	3	-1
2022-06-18	246	3	18	210	10	5	11	0	1	9	1	0	0	0	0	0	0	0	0	0	0	0	0	0	0	0	0	0	0	0	0	0	0	0	0	0	-151	-1	0
2022-06-19	221	2	17	186	14	2	14	0	1	11	2	0	0	0	0	0	0	0	1	0	0	1	0	0	0	0	0	0	0	0	1	0	0	1	0	0	-25	3	1
2022-06-20	701	13	55	583	32	18	15	2	1	12	0	0	1	0	1	0	0	0	0	0	0	0	0	0	2	0	1	1	0	0	0	0	0	0	0	0	480	1	1
2022-06-21	581	3	38	491	38	11	22	0	0	20	1	1	0	0	0	0	0	0	0	0	0	0	0	0	0	0	0	0	0	0	0	0	0	0	0	0	-120	7	-2
2022-06-22	632	5	41	546	29	11	21	0	1	19	0	1	0	0	0	0	0	0	1	0	0	1	0	0	0	0	0	0	0	0	1	0	0	1	0	0	51	-1	1
2022-06-23	573	8	38	478	30	19	15	1	1	10	3	0	0	0	0	0	0	0	0	0	0	0	0	0	0	0	0	0	0	0	0	0	0	0	0	0	-59	-6	-1
2022-06-24	242	1	8	206	17	10	15	0	0	8	4	3	0	0	0	0	0	0	1	0	0	1	0	0	0	0	0	0	0	0	1	0	0	1	0	0	-331	0	1
2022-06-25	374	4	20	325	21	4	18	0	0	16	2	0	0	0	0	0	0	0	0	0	0	0	0	0	1	0	0	1	0	0	0	0	0	0	0	0	132	3	0
2022-06-26	313	4	13	255	35	6	16	0	2	9	5	0	0	0	0	0	0	0	1	0	1	0	0	0	0	0	0	0	0	0	1	0	1	0	0	0	-61	-2	0
2022-06-27	838	9	47	709	55	18	16	0	2	14	0	0	0	0	0	0	0	0	0	0	0	0	0	0	0	0	0	0	0	0	0	0	0	0	0	0	525	0	-1
2022-06-28	724	7	38	613	51	15	26	2	2	19	2	1	1	0	0	0	1	0	0	0	0	0	0	0	1	0	0	0	1	0	0	0	0	0	0	0	-114	10	1
2022-06-29	592	4	34	508	31	15	19	1	0	16	2	0	0	0	0	0	0	0	0	0	0	0	0	0	0	0	0	0	0	0	0	0	0	0	0	0	-132	-7	-1
2022-06-30	638	2	37	535	38	26	24	0	2	20	0	2	0	0	0	0	0	0	0	0	0	0	0	0	0	0	0	0	0	0	0	0	0	0	0	0	46	5	0
2022-07-01	542	6	30	456	35	15	18	2	1	12	3	0	0	0	0	0	0	0	0	0	0	0	0	0	0	0	0	0	0	0	0	0	0	0	0	0	-96	-6	0
2022-07-02	299	5	8	259	13	14	15	1	1	12	0	1	0	0	0	0	0	0	1	1	0	0	0	0	0	0	0	0	0	0	1	1	0	0	0	0	-243	-3	1
2022-07-03	246	2	9	208	22	5	13	0	1	10	2	0	0	0	0	0	0	0	0	0	0	0	0	0	0	0	0	0	0	0	0	0	0	0	0	0	-53	-2	-1
2022-07-04	697	2	25	609	45	16	14	1	0	12	1	0	0	0	0	0	0	0	1	0	0	1	0	0	0	0	0	0	0	0	1	0	0	1	0	0	451	1	1
2022-07-05	511	7	19	431	37	17	19	0	1	15	3	0	0	0	0	0	0	0	0	0	0	0	0	0	0	0	0	0	0	0	0	0	0	0	0	0	-186	5	-1
2022-07-06	567	5	22	472	37	31	17	0	0	11	2	4	0	0	0	0	0	0	0	0	0	0	0	0	1	0	0	1	0	0	0	0	0	0	0	0	56	-2	1
2022-07-07	428	1	26	365	22	14	18	0	1	14	1	2	0	0	0	0	0	0	1	0	0	1	0	0	0	0	0	0	0	0	1	0	0	1	0	0	-139	1	0
2022-07-08	434	6	15	371	31	11	18	0	1	14	1	2	0	0	0	0	0	0	0	0	0	0	0	0	0	0	0	0	0	0	0	0	0	0	0	0	6	0	-1
2022-07-09	235	0	13	199	16	7	12	0	3	9	0	0	0	0	0	0	0	0	0	0	0	0	0	0	0	0	0	0	0	0	0	0	0	0	0	0	-199	-6	0
2022-07-10	172	3	7	141	12	9	16	0	0	12	2	2	1	0	1	0	0	0	0	0	0	0	0	0	1	0	1	0	0	0	0	0	0	0	0	0	-63	4	1
2022-07-11	462	3	12	397	32	18	17	0	0	15	2	0	1	0	0	0	1	0	0	0	0	0	0	0	1	0	0	0	1	0	0	0	0	0	0	0	290	1	0
2022-07-12	374	3	17	320	22	12	20	0	1	17	1	1	0	0	0	0	0	0	0	0	0	0	0	0	0	0	0	0	0	0	0	0	0	0	0	0	-88	3	-1
2022-07-13	325	2	9	288	19	7	15	0	0	13	1	1	1	0	0	1	0	0	0	0	0	0	0	0	2	0	0	2	0	0	1	0	0	1	0	0	-49	-5	3
2022-07-14	277	3	8	237	22	7	17	1	1	15	0	0	0	0	0	0	0	0	1	0	0	1	0	0	0	0	0	0	0	0	1	0	0	1	0	0	-48	2	-2
2022-07-15	232	4	8	194	21	5	19	2	2	10	4	1	1	0	0	1	0	0	0	0	0	0	0	0	1	0	0	1	0	0	0	0	0	0	0	0	-45	2	0
2022-07-16	134	2	2	113	7	10	8	0	1	6	1	0	0	0	0	0	0	0	0	0	0	0	0	0	0	0	0	0	0	0	0	0	0	0	0	0	-98	-11	-1
2022-07-17	118	1	5	105	6	1	13	0	1	12	0	0	0	0	0	0	0	0	0	0	0	0	0	0	0	0	0	0	0	0	0	0	0	0	0	0	-16	5	0
2022-07-18	291	6	4	246	22	13	10	0	0	8	1	1	0	0	0	0	0	0	0	0	0	0	0	0	1	0	0	1	0	0	0	0	0	0	0	0	173	-3	1
2022-07-19	234	3	2	195	28	6	14	0	0	13	1	0	0	0	0	0	0	0	0	0	0	0	0	0	0	0	0	0	0	0	0	0	0	0	0	0	-57	4	-1
2022-07-20	223	2	8	187	15	11	15	0	0	10	3	2	0	0	0	0	0	0	0	0	0	0	0	0	1	0	0	0	1	0	0	0	0	0	0	0	-11	1	1
2022-07-21	180	3	1	150	19	7	13	0	0	10	3	0	1	0	0	0	0	1	0	0	0	0	0	0	1	0	0	0	0	1	0	0	0	0	0	0	-43	-2	0
2022-07-22	178	1	2	148	16	11	7	1	0	4	1	1	0	0	0	0	0	0	0	0	0	0	0	0	0	0	0	0	0	0	0	0	0	0	0	0	-2	-6	-1
2022-07-23	95	1	2	80	8	4	12	0	0	10	2	0	0	0	0	0	0	0	0	0	0	0	0	0	0	0	0	0	0	0	0	0	0	0	0	0	-83	5	0
2022-07-24	81	0	1	71	4	5	9	0	0	8	1	0	0	0	0	0	0	0	0	0	0	0	0	0	0	0	0	0	0	0	0	0	0	0	0	0	-14	-3	0
2022-07-25	227	2	4	184	27	10	8	0	0	6	2	0	0	0	0	0	0	0	0	0	0	0	0	0	1	0	0	1	0	0	0	0	0	0	0	0	146	-1	1
2022-07-26	133	1	1	115	7	9	3	0	0	3	0	0	1	0	0	1	0	0	0	0	0	0	0	0	1	0	0	1	0	0	0	0	0	0	0	0	-94	-5	0
2022-07-27	159	3	0	129	21	6	6	0	0	5	0	1	0	0	0	0	0	0	0	0	0	0	0	0	0	0	0	0	0	0	0	0	0	0	0	0	26	3	-1
2022-07-28	122	3	1	93	17	8	13	0	0	8	5	0	0	0	0	0	0	0	0	0	0	0	0	0	0	0	0	0	0	0	1	0	0	1	0	0	-37	7	1
2022-07-29	132	0	0	116	12	4	7	0	0	3	4	0	0	0	0	0	0	0	0	0	0	0	0	0	0	0	0	0	0	0	0	0	0	0	0	0	10	-6	-1
2022-07-30	61	1	1	51	3	5	3	1	0	2	0	0	0	0	0	0	0	0	0	0	0	0	0	0	0	0	0	0	0	0	0	0	0	0	0	0	-71	-4	0
2022-07-31	51	1	0	41	9	0	4	0	0	4	0	0	1	0	0	0	1	0	0	0	0	0	0	0	1	0	0	0	1	0	0	0	0	0	0	0	-10	1	1
2022-08-01	162	3	2	135	18	4	13	1	1	10	0	1	0	0	0	0	0	0	0	0	0	0	0	0	0	0	0	0	0	0	0	0	0	0	0	0	111	9	-1
2022-08-02	125	1	2	103	16	3	5	0	0	4	1	0	0	0	0	0	0	0	0	0	0	0	0	0	0	0	0	0	0	0	0	0	0	0	0	0	-37	-8	0
2022-08-03	112	1	1	81	21	8	7	0	0	3	4	0	0	0	0	0	0	0	1	0	0	1	0	0	0	0	0	0	0	0	1	0	0	1	0	0	-13	2	1
2022-08-04	88	0	0	74	11	3	4	0	0	4	0	0	0	0	0	0	0	0	0	0	0	0	0	0	0	0	0	0	0	0	0	0	0	0	0	0	-24	-3	-1
2022-08-05	73	2	0	57	9	5	4	0	0	3	0	1	0	0	0	0	0	0	1	0	0	1	0	0	0	0	0	0	0	0	1	0	0	1	0	0	-15	0	1
2022-08-06	52	0	0	40	10	2	3	0	0	3	0	0	1	0	0	1	0	0	0	0	0	0	0	0	1	0	0	1	0	0	0	0	0	0	0	0	-21	-1	0
2022-08-07	40	1	0	33	3	3	3	0	0	3	0	0	0	0	0	0	0	0	0	0	0	0	0	0	0	0	0	0	0	0	0	0	0	0	0	0	-12	0	-1
2022-08-08	92	2	1	64	22	3	5	1	0	2	2	0	0	0	0	0	0	0	0	0	0	0	0	0	1	0	0	1	0	0	0	0	0	0	0	0	52	2	1
2022-08-09	80	0	0	58	16	6	4	0	0	3	1	0	0	0	0	0	0	0	0	0	0	0	0	0	0	0	0	0	0	0	0	0	0	0	0	0	-12	-1	-1
2022-08-10	69	0	1	53	11	4	3	0	0	1	2	0	0	0	0	0	0	0	0	0	0	0	0	0	1	0	0	1	0	0	0	0	0	0	0	0	-11	-1	1
2022-08-11	66	0	1	41	22	2	1	0	0	0	1	0	0	0	0	0	0	0	0	0	0	0	0	0	1	0	0	0	1	0	0	0	0	0	0	0	-3	-2	0
2022-08-12	60	1	1	41	15	2	4	0	1	2	1	0	0	0	0	0	0	0	0	0	0	0	0	0	0	0	0	0	0	0	0	0	0	0	0	0	-6	3	-1
2022-08-13	33	1	2	23	7	0	3	0	0	1	2	0	0	0	0	0	0	0	0	0	0	0	0	0	0	0	0	0	0	0	0	0	0	0	0	0	-27	-1	0
2022-08-14	28	0	0	17	11	0	2	0	0	1	1	0	0	0	0	0	0	0	0	0	0	0	0	0	0	0	0	0	0	0	0	0	0	0	0	0	-5	-1	0
2022-08-15	31	0	0	20	10	1	3	0	0	1	2	0	0	0	0	0	0	0	0	0	0	0	0	0	0	0	0	0	0	0	0	0	0	0	0	0	3	1	0
2022-08-16	78	0	4	57	16	1	4	0	0	3	1	0	0	0	0	0	0	0	0	0	0	0	0	0	0	0	0	0	0	0	0	0	0	0	0	0	47	1	0
2022-08-17	57	1	0	35	19	2	4	0	0	3	1	0	0	0	0	0	0	0	0	0	0	0	0	0	1	0	0	1	0	0	0	0	0	0	0	0	-21	0	1
2022-08-18	49	0	0	24	21	4	2	0	0	1	1	0	0	0	0	0	0	0	0	0	0	0	0	0	0	0	0	0	0	0	0	0	0	0	0	0	-8	-2	-1
2022-08-19	59	2	0	32	22	3	5	0	0	4	1	0	0	0	0	0	0	0	1	0	0	1	0	0	0	0	0	0	0	0	1	0	0	1	0	0	10	3	1
2022-08-20	30	0	0	15	11	4	1	0	0	0	1	0	0	0	0	0	0	0	0	0	0	0	0	0	0	0	0	0	0	0	0	0	0	0	0	0	-29	-4	-1
2022-08-21	27	0	1	11	14	1	2	0	0	2	0	0	0	0	0	0	0	0	0	0	0	0	0	0	0	0	0	0	0	0	0	0	0	0	0	0	-3	1	0
2022-08-22	78	0	0	38	34	6	4	0	0	1	2	1	0	0	0	0	0	0	0	0	0	0	0	0	0	0	0	0	0	0	0	0	0	0	0	0	51	2	0
2022-08-23	62	0	3	28	27	4	4	0	0	0	4	0	0	0	0	0	0	0	0	0	0	0	0	0	0	0	0	0	0	0	0	0	0	0	0	0	-16	0	0
2022-08-24	63	1	0	28	31	3	4	1	0	0	2	1	0	0	0	0	0	0	0	0	0	0	0	0	0	0	0	0	0	0	0	0	0	0	0	0	1	0	0
2022-08-25	48	0	1	27	17	3	3	0	1	1	1	0	0	0	0	0	0	0	0	0	0	0	0	0	1	0	0	0	1	0	0	0	0	0	0	0	-15	-1	1
2022-08-26	54	0	0	23	30	1	2	0	0	1	1	0	0	0	0	0	0	0	0	0	0	0	0	0	0	0	0	0	0	0	0	0	0	0	0	0	6	-1	-1
2022-08-27	35	0	0	16	19	0	3	0	0	1	2	0	0	0	0	0	0	0	0	0	0	0	0	0	0	0	0	0	0	0	0	0	0	0	0	0	-19	1	0
2022-08-28	37	0	0	13	23	1	4	0	0	1	3	0	0	0	0	0	0	0	0	0	0	0	0	0	0	0	0	0	0	0	0	0	0	0	0	0	2	1	0
2022-08-29	62	1	0	23	37	1	3	0	0	2	1	0	0	0	0	0	0	0	0	0	0	0	0	0	0	0	0	0	0	0	0	0	0	0	0	0	25	-1	0
2022-08-30	45	1	0	21	20	3	6	1	0	2	2	1	0	0	0	0	0	0	1	0	0	1	0	0	0	0	0	0	0	0	1	0	0	1	0	0	-17	3	1
2022-08-31	51	0	1	17	30	3	5	0	0	1	4	0	0	0	0	0	0	0	0	0	0	0	0	0	0	0	0	0	0	0	0	0	0	0	0	0	6	-1	-1
2022-09-01	55	1	0	15	35	4	5	0	0	0	5	0	0	0	0	0	0	0	0	0	0	0	0	0	0	0	0	0	0	0	0	0	0	0	0	0	4	0	0
2022-09-02	45	0	2	12	29	2	4	0	1	1	2	0	0	0	0	0	0	0	0	0	0	0	0	0	0	0	0	0	0	0	0	0	0	0	0	0	-10	-1	0
2022-09-03	27	0	2	9	13	3	4	0	1	0	1	2	0	0	0	0	0	0	0	0	0	0	0	0	0	0	0	0	0	0	0	0	0	0	0	0	-18	0	0
2022-09-04	21	0	0	8	13	0	0	0	0	0	0	0	0	0	0	0	0	0	0	0	0	0	0	0	0	0	0	0	0	0	0	0	0	0	0	0	-6	-4	0
2022-09-05	52	0	0	12	40	0	3	0	0	0	3	0	0	0	0	0	0	0	0	0	0	0	0	0	0	0	0	0	0	0	0	0	0	0	0	0	31	3	0
2022-09-06	34	0	0	13	21	0	1	0	0	0	1	0	0	0	0	0	0	0	0	0	0	0	0	0	0	0	0	0	0	0	0	0	0	0	0	0	-18	-2	0
2022-09-07	63	0	2	12	45	4	3	0	0	0	3	0	0	0	0	0	0	0	0	0	0	0	0	0	0	0	0	0	0	0	1	0	0	0	1	0	29	2	1
2022-09-08	49	0	0	12	36	1	3	0	0	0	3	0	0	0	0	0	0	0	0	0	0	0	0	0	0	0	0	0	0	0	0	0	0	0	0	0	-14	0	-1
2022-09-09	54	0	2	21	28	3	7	0	0	5	2	0	0	0	0	0	0	0	0	0	0	0	0	0	0	0	0	0	0	0	0	0	0	0	0	0	5	4	0
2022-09-10	28	0	0	4	22	2	0	0	0	0	0	0	0	0	0	0	0	0	0	0	0	0	0	0	0	0	0	0	0	0	0	0	0	0	0	0	-26	-7	0
2022-09-11	28	0	0	5	21	2	1	0	0	0	1	0	0	0	0	0	0	0	0	0	0	0	0	0	0	0	0	0	0	0	0	0	0	0	0	0	0	1	0
2022-09-12	76	1	3	8	62	2	5	0	0	2	3	0	0	0	0	0	0	0	0	0	0	0	0	0	0	0	0	0	0	0	0	0	0	0	0	0	48	4	0
2022-09-13	53	0	0	6	45	2	4	0	0	0	3	1	0	0	0	0	0	0	0	0	0	0	0	0	0	0	0	0	0	0	0	0	0	0	0	0	-23	-1	0
2022-09-14	57	0	2	5	48	2	3	0	0	0	2	1	0	0	0	0	0	0	0	0	0	0	0	0	0	0	0	0	0	0	0	0	0	0	0	0	4	-1	0
2022-09-15	44	0	1	3	39	1	2	0	0	0	2	0	0	0	0	0	0	0	0	0	0	0	0	0	0	0	0	0	0	0	0	0	0	0	0	0	-13	-1	0
2022-09-16	58	0	1	6	46	5	2	0	0	1	1	0	0	0	0	0	0	0	0	0	0	0	0	0	0	0	0	0	0	0	0	0	0	0	0	0	14	0	0
2022-09-17	19	0	0	1	17	1	1	0	0	0	1	0	0	0	0	0	0	0	0	0	0	0	0	0	0	0	0	0	0	0	0	0	0	0	0	0	-39	-1	0
2022-09-18	21	0	0	1	20	0	1	0	0	0	1	0	0	0	0	0	0	0	0	0	0	0	0	0	0	0	0	0	0	0	0	0	0	0	0	0	2	0	0
2022-09-19	84	1	2	9	67	5	0	0	0	0	0	0	0	0	0	0	0	0	0	0	0	0	0	0	0	0	0	0	0	0	0	0	0	0	0	0	63	-1	0
2022-09-20	54	1	0	2	51	0	1	0	0	1	0	0	0	0	0	0	0	0	0	0	0	0	0	0	0	0	0	0	0	0	0	0	0	0	0	0	-30	1	0
2022-09-21	76	1	0	7	66	2	1	0	0	0	0	1	0	0	0	0	0	0	0	0	0	0	0	0	0	0	0	0	0	0	0	0	0	0	0	0	22	0	0
2022-09-22	68	0	3	3	58	4	8	0	0	0	7	1	0	0	0	0	0	0	0	0	0	0	0	0	0	0	0	0	0	0	0	0	0	0	0	0	-8	7	0
2022-09-23	46	0	0	2	42	2	1	0	0	0	1	0	0	0	0	0	0	0	0	0	0	0	0	0	0	0	0	0	0	0	0	0	0	0	0	0	-22	-7	0
2022-09-24	36	0	1	1	32	2	3	0	1	0	2	0	0	0	0	0	0	0	0	0	0	0	0	0	0	0	0	0	0	0	0	0	0	0	0	0	-10	2	0
2022-09-25	21	0	0	0	21	0	0	0	0	0	0	0	0	0	0	0	0	0	0	0	0	0	0	0	0	0	0	0	0	0	0	0	0	0	0	0	-15	-3	0
2022-09-26	69	1	0	3	63	2	6	0	0	0	5	1	0	0	0	0	0	0	0	0	0	0	0	0	0	0	0	0	0	0	0	0	0	0	0	0	48	6	0
2022-09-27	77	0	1	4	72	0	8	0	0	1	7	0	0	0	0	0	0	0	0	0	0	0	0	0	0	0	0	0	0	0	0	0	0	0	0	0	8	2	0
2022-09-28	63	0	2	4	56	1	6	0	0	0	6	0	0	0	0	0	0	0	0	0	0	0	0	0	0	0	0	0	0	0	0	0	0	0	0	0	-14	-2	0
2022-09-29	55	1	0	5	45	4	3	1	0	0	2	0	0	0	0	0	0	0	0	0	0	0	0	0	0	0	0	0	0	0	0	0	0	0	0	0	-8	-3	0
2022-09-30	58	0	0	2	54	2	3	0	0	0	3	0	0	0	0	0	0	0	0	0	0	0	0	0	0	0	0	0	0	0	0	0	0	0	0	0	3	0	0
2022-10-01	37	0	0	1	34	2	5	0	0	0	3	2	0	0	0	0	0	0	0	0	0	0	0	0	0	0	0	0	0	0	0	0	0	0	0	0	-21	2	0
2022-10-02	35	1	0	0	33	1	3	0	0	0	3	0	0	0	0	0	0	0	0	0	0	0	0	0	0	0	0	0	0	0	0	0	0	0	0	0	-2	-2	0
2022-10-03	84	3	2	2	73	4	4	0	0	0	3	1	0	0	0	0	0	0	0	0	0	0	0	0	0	0	0	0	0	0	0	0	0	0	0	0	49	1	0
2022-10-04	92	1	0	1	89	1	6	0	0	0	6	0	0	0	0	0	0	0	1	0	0	0	1	0	0	0	0	0	0	0	1	0	0	0	1	0	8	2	1
2022-10-05	91	1	1	3	83	3	9	0	1	0	8	0	0	0	0	0	0	0	0	0	0	0	0	0	0	0	0	0	0	0	0	0	0	0	0	0	-1	3	-1
2022-10-06	89	0	1	3	84	1	4	0	0	0	4	0	0	0	0	0	0	0	0	0	0	0	0	0	0	0	0	0	0	0	0	0	0	0	0	0	-2	-5	0
2022-10-07	83	1	2	1	76	3	5	0	0	0	4	1	1	1	0	0	0	0	0	0	0	0	0	0	1	1	0	0	0	0	0	0	0	0	0	0	-6	1	1
2022-10-08	49	0	0	1	46	2	7	0	0	0	7	0	0	0	0	0	0	0	0	0	0	0	0	0	0	0	0	0	0	0	0	0	0	0	0	0	-34	2	-1
2022-10-09	40	0	0	2	36	2	3	0	0	0	3	0	0	0	0	0	0	0	0	0	0	0	0	0	0	0	0	0	0	0	0	0	0	0	0	0	-9	-4	0
2022-10-10	106	0	0	4	99	3	3	0	0	0	3	0	0	0	0	0	0	0	0	0	0	0	0	0	0	0	0	0	0	0	0	0	0	0	0	0	66	0	0
2022-10-11	112	3	2	2	100	5	8	0	0	0	8	0	0	0	0	0	0	0	1	0	0	0	1	0	0	0	0	0	0	0	1	0	0	0	1	0	6	5	1
2022-10-12	38	1	0	0	36	1	2	0	0	0	2	0	0	0	0	0	0	0	0	0	0	0	0	0	0	0	0	0	0	0	0	0	0	0	0	0	-74	-6	-1
2022-10-13	128	0	0	3	123	2	3	0	0	0	3	0	0	0	0	0	0	0	0	0	0	0	0	0	0	0	0	0	0	0	0	0	0	0	0	0	90	1	0
2022-10-14	108	5	1	0	97	5	5	0	0	0	4	1	0	0	0	0	0	0	0	0	0	0	0	0	0	0	0	0	0	0	0	0	0	0	0	0	-20	2	0
2022-10-15	68	5	1	0	59	3	6	1	0	0	5	0	0	0	0	0	0	0	0	0	0	0	0	0	0	0	0	0	0	0	0	0	0	0	0	0	-40	1	0
2022-10-16	49	2	1	1	42	3	2	0	1	0	1	0	0	0	0	0	0	0	0	0	0	0	0	0	0	0	0	0	0	0	0	0	0	0	0	0	-19	-4	0
2022-10-17	132	7	1	3	116	5	3	0	0	0	3	0	1	1	0	0	0	0	0	0	0	0	0	0	1	1	0	0	0	0	0	0	0	0	0	0	83	1	1
2022-10-18	102	6	0	3	93	0	10	0	0	0	10	0	0	0	0	0	0	0	0	0	0	0	0	0	0	0	0	0	0	0	0	0	0	0	0	0	-30	7	-1
2022-10-19	90	2	2	1	84	1	0	0	0	0	0	0	0	0	0	0	0	0	0	0	0	0	0	0	0	0	0	0	0	0	0	0	0	0	0	0	-12	-10	0
2022-10-20	83	5	2	1	74	1	5	0	0	0	5	0	0	0	0	0	0	0	0	0	0	0	0	0	0	0	0	0	0	0	0	0	0	0	0	0	-7	5	0
2022-10-21	89	6	0	2	79	2	5	0	0	0	5	0	0	0	0	0	0	0	0	0	0	0	0	0	0	0	0	0	0	0	0	0	0	0	0	0	6	0	0
2022-10-22	54	2	2	1	46	3	3	0	0	0	2	1	0	0	0	0	0	0	0	0	0	0	0	0	0	0	0	0	0	0	0	0	0	0	0	0	-35	-2	0
2022-10-23	50	0	0	0	48	2	7	0	0	0	7	0	0	0	0	0	0	0	0	0	0	0	0	0	0	0	0	0	0	0	0	0	0	0	0	0	-4	4	0
2022-10-24	136	9	3	1	118	5	6	1	0	0	5	0	0	0	0	0	0	0	0	0	0	0	0	0	0	0	0	0	0	0	0	0	0	0	0	0	86	-1	0
2022-10-25	115	7	1	1	102	4	6	0	0	0	6	0	0	0	0	0	0	0	0	0	0	0	0	0	0	0	0	0	0	0	0	0	0	0	0	0	-21	0	0
2022-10-26	103	14	3	2	83	1	3	0	0	0	3	0	0	0	0	0	0	0	0	0	0	0	0	0	0	0	0	0	0	0	0	0	0	0	0	0	-12	-3	0
2022-10-27	101	10	0	0	89	2	10	2	0	0	8	0	0	0	0	0	0	0	0	0	0	0	0	0	0	0	0	0	0	0	0	0	0	0	0	0	-2	7	0
2022-10-28	87	14	0	2	68	3	2	1	0	0	1	0	0	0	0	0	0	0	0	0	0	0	0	0	0	0	0	0	0	0	0	0	0	0	0	0	-14	-8	0
2022-10-29	52	6	1	0	44	1	6	1	0	0	5	0	0	0	0	0	0	0	0	0	0	0	0	0	0	0	0	0	0	0	0	0	0	0	0	0	-35	4	0
2022-10-30	46	3	0	1	40	2	1	1	0	0	0	0	0	0	0	0	0	0	0	0	0	0	0	0	0	0	0	0	0	0	0	0	0	0	0	0	-6	-5	0
2022-10-31	122	17	2	1	96	6	9	1	0	0	7	1	0	0	0	0	0	0	0	0	0	0	0	0	0	0	0	0	0	0	0	0	0	0	0	0	76	8	0
2022-11-01	58	8	0	1	47	2	4	0	0	0	4	0	0	0	0	0	0	0	0	0	0	0	0	0	0	0	0	0	0	0	0	0	0	0	0	0	-64	-5	0
2022-11-02	148	15	2	3	122	6	1	0	0	0	1	0	0	0	0	0	0	0	0	0	0	0	0	0	0	0	0	0	0	0	0	0	0	0	0	0	90	-3	0
2022-11-03	114	14	2	1	96	1	6	2	0	0	4	0	0	0	0	0	0	0	0	0	0	0	0	0	0	0	0	0	0	0	0	0	0	0	0	0	-34	5	0
2022-11-04	121	14	0	1	101	5	4	0	0	0	4	0	0	0	0	0	0	0	0	0	0	0	0	0	0	0	0	0	0	0	0	0	0	0	0	0	7	-2	0
2022-11-05	55	5	0	0	50	0	2	0	0	0	2	0	0	0	0	0	0	0	0	0	0	0	0	0	0	0	0	0	0	0	0	0	0	0	0	0	-66	-2	0
2022-11-06	36	5	0	1	30	0	2	0	0	0	2	0	0	0	0	0	0	0	0	0	0	0	0	0	0	0	0	0	0	0	0	0	0	0	0	0	-19	0	0
2022-11-07	124	21	3	3	93	4	11	3	0	2	5	1	0	0	0	0	0	0	0	0	0	0	0	0	0	0	0	0	0	0	0	0	0	0	0	0	88	9	0
2022-11-08	104	9	1	2	88	4	4	1	0	0	3	0	0	0	0	0	0	0	0	0	0	0	0	0	0	0	0	0	0	0	0	0	0	0	0	0	-20	-7	0
2022-11-09	132	15	0	1	113	3	4	0	0	0	4	0	0	0	0	0	0	0	0	0	0	0	0	0	0	0	0	0	0	0	0	0	0	0	0	0	28	0	0
2022-11-10	113	16	1	4	87	5	11	1	0	2	6	2	0	0	0	0	0	0	0	0	0	0	0	0	0	0	0	0	0	0	0	0	0	0	0	0	-19	7	0
2022-11-11	120	20	3	4	90	3	6	1	1	0	4	0	0	0	0	0	0	0	0	0	0	0	0	0	0	0	0	0	0	0	0	0	0	0	0	0	7	-5	0
2022-11-12	54	9	0	1	43	1	5	1	0	0	4	0	0	0	0	0	0	0	0	0	0	0	0	0	0	0	0	0	0	0	0	0	0	0	0	0	-66	-1	0
2022-11-13	63	8	0	1	51	3	5	0	0	0	5	0	0	0	0	0	0	0	0	0	0	0	0	0	0	0	0	0	0	0	0	0	0	0	0	0	9	0	0
2022-11-14	170	33	1	6	127	3	8	1	0	2	5	0	0	0	0	0	0	0	0	0	0	0	0	0	0	0	0	0	0	0	0	0	0	0	0	0	107	3	0
2022-11-15	159	31	3	3	113	9	13	0	1	3	7	2	0	0	0	0	0	0	0	0	0	0	0	0	0	0	0	0	0	0	0	0	0	0	0	0	-11	5	0
2022-11-16	155	42	3	0	101	9	9	4	0	0	5	0	0	0	0	0	0	0	0	0	0	0	0	0	1	0	0	0	1	0	0	0	0	0	0	0	-4	-4	1
2022-11-17	153	37	3	4	106	3	7	1	0	1	5	0	0	0	0	0	0	0	0	0	0	0	0	0	0	0	0	0	0	0	0	0	0	0	0	0	-2	-2	-1
2022-11-18	134	27	2	2	97	6	12	3	0	0	7	2	0	0	0	0	0	0	0	0	0	0	0	0	0	0	0	0	0	0	0	0	0	0	0	0	-19	5	0
2022-11-19	52	14	0	2	33	3	5	1	0	0	4	0	0	0	0	0	0	0	0	0	0	0	0	0	0	0	0	0	0	0	0	0	0	0	0	0	-82	-7	0
2022-11-20	61	17	0	1	40	3	5	1	0	0	4	0	0	0	0	0	0	0	0	0	0	0	0	0	0	0	0	0	0	0	0	0	0	0	0	0	9	0	0
2022-11-21	171	45	2	2	117	5	12	3	1	0	7	1	0	0	0	0	0	0	0	0	0	0	0	0	0	0	0	0	0	0	0	0	0	0	0	0	110	7	0
2022-11-22	137	32	0	1	98	6	10	3	0	0	7	0	0	0	0	0	0	0	0	0	0	0	0	0	0	0	0	0	0	0	0	0	0	0	0	0	-34	-2	0
2022-11-23	118	32	0	1	81	4	10	2	0	0	6	2	0	0	0	0	0	0	0	0	0	0	0	0	0	0	0	0	0	0	0	0	0	0	0	0	-19	0	0
2022-11-24	108	26	3	2	75	2	11	3	0	0	8	0	0	0	0	0	0	0	0	0	0	0	0	0	0	0	0	0	0	0	0	0	0	0	0	0	-10	1	0
2022-11-25	95	26	0	3	64	2	9	2	0	0	7	0	0	0	0	0	0	0	0	0	0	0	0	0	0	0	0	0	0	0	0	0	0	0	0	0	-13	-2	0
2022-11-26	57	14	0	2	39	2	13	4	0	2	5	2	0	0	0	0	0	0	0	0	0	0	0	0	0	0	0	0	0	0	0	0	0	0	0	0	-38	4	0
2022-11-27	58	14	0	1	42	1	9	2	0	1	6	0	0	0	0	0	0	0	0	0	0	0	0	0	0	0	0	0	0	0	0	0	0	0	0	0	1	-4	0
2022-11-28	136	27	2	4	98	5	14	4	1	0	8	1	0	0	0	0	0	0	0	0	0	0	0	0	0	0	0	0	0	0	0	0	0	0	0	0	78	5	0
2022-11-29	125	39	0	3	77	6	6	1	0	0	5	0	0	0	0	0	0	0	0	0	0	0	0	0	0	0	0	0	0	0	0	0	0	0	0	0	-11	-8	0
2022-11-30	97	32	0	2	57	6	9	1	0	1	6	1	0	0	0	0	0	0	0	0	0	0	0	0	0	0	0	0	0	0	0	0	0	0	0	0	-28	3	0
2022-12-01	117	35	2	4	68	8	11	4	0	0	5	2	0	0	0	0	0	0	0	0	0	0	0	0	0	0	0	0	0	0	0	0	0	0	0	0	20	2	0
2022-12-02	115	32	0	1	77	5	10	0	0	0	10	0	0	0	0	0	0	0	0	0	0	0	0	0	0	0	0	0	0	0	0	0	0	0	0	0	-2	-1	0
2022-12-03	59	14	1	1	41	2	9	2	0	0	6	1	0	0	0	0	0	0	1	0	0	0	1	0	0	0	0	0	0	0	1	0	0	0	1	0	-56	-1	1
2022-12-04	40	8	0	1	31	0	9	0	0	0	9	0	0	0	0	0	0	0	0	0	0	0	0	0	0	0	0	0	0	0	0	0	0	0	0	0	-19	0	-1
2022-12-05	133	28	3	3	94	5	9	0	0	2	7	0	0	0	0	0	0	0	0	0	0	0	0	0	0	0	0	0	0	0	0	0	0	0	0	0	93	0	0
2022-12-06	48	16	0	1	28	3	8	3	0	0	5	0	0	0	0	0	0	0	0	0	0	0	0	0	0	0	0	0	0	0	0	0	0	0	0	0	-85	-1	0
2022-12-07	140	47	1	5	81	6	15	3	0	1	10	1	1	1	0	0	0	0	0	0	0	0	0	0	1	1	0	0	0	0	0	0	0	0	0	0	92	7	1
2022-12-08	54	13	0	1	34	6	9	1	0	0	5	3	0	0	0	0	0	0	0	0	0	0	0	0	0	0	0	0	0	0	0	0	0	0	0	0	-86	-6	-1
2022-12-09	121	27	1	4	86	3	15	1	0	1	11	2	0	0	0	0	0	0	0	0	0	0	0	0	0	0	0	0	0	0	0	0	0	0	0	0	67	6	0
2022-12-10	54	17	0	3	30	4	9	5	0	0	2	2	0	0	0	0	0	0	0	0	0	0	0	0	0	0	0	0	0	0	0	0	0	0	0	0	-67	-6	0
2022-12-11	44	17	0	1	24	2	5	1	0	1	3	0	0	0	0	0	0	0	0	0	0	0	0	0	0	0	0	0	0	0	0	0	0	0	0	0	-10	-4	0
2022-12-12	97	28	1	1	66	1	8	2	0	0	6	0	0	0	0	0	0	0	0	0	0	0	0	0	0	0	0	0	0	0	0	0	0	0	0	0	53	3	0
2022-12-13	86	30	1	2	51	2	9	3	0	0	5	1	0	0	0	0	0	0	0	0	0	0	0	0	0	0	0	0	0	0	0	0	0	0	0	0	-11	1	0
2022-12-14	82	20	1	4	54	3	7	2	0	2	3	0	0	0	0	0	0	0	0	0	0	0	0	0	0	0	0	0	0	0	0	0	0	0	0	0	-4	-2	0
2022-12-15	99	34	2	2	54	7	11	3	0	1	5	2	0	0	0	0	0	0	0	0	0	0	0	0	0	0	0	0	0	0	1	0	0	0	1	0	17	4	1
2022-12-16	84	17	2	5	54	6	14	1	2	1	9	1	0	0	0	0	0	0	0	0	0	0	0	0	0	0	0	0	0	0	0	0	0	0	0	0	-15	3	-1
2022-12-17	30	7	0	1	21	1	3	1	0	0	2	0	0	0	0	0	0	0	0	0	0	0	0	0	0	0	0	0	0	0	0	0	0	0	0	0	-54	-11	0
2022-12-18	41	16	1	0	21	3	6	2	0	0	3	1	0	0	0	0	0	0	0	0	0	0	0	0	1	0	0	0	1	0	0	0	0	0	0	0	11	3	1
2022-12-19	83	27	0	3	50	3	11	1	0	1	8	1	0	0	0	0	0	0	0	0	0	0	0	0	0	0	0	0	0	0	0	0	0	0	0	0	42	5	-1
2022-12-20	68	19	1	0	45	3	9	2	0	0	7	0	0	0	0	0	0	0	0	0	0	0	0	0	0	0	0	0	0	0	0	0	0	0	0	0	-15	-2	0
2022-12-21	63	27	0	3	33	0	16	5	0	1	10	0	0	0	0	0	0	0	0	0	0	0	0	0	0	0	0	0	0	0	0	0	0	0	0	0	-5	7	0
2022-12-22	53	10	2	2	37	2	6	2	0	0	4	0	0	0	0	0	0	0	0	0	0	0	0	0	0	0	0	0	0	0	0	0	0	0	0	0	-10	-10	0
2022-12-23	51	15	0	1	28	7	10	2	0	0	5	3	0	0	0	0	0	0	0	0	0	0	0	0	0	0	0	0	0	0	0	0	0	0	0	0	-2	4	0
2022-12-24	28	9	0	0	15	4	7	1	0	0	5	1	0	0	0	0	0	0	0	0	0	0	0	0	0	0	0	0	0	0	0	0	0	0	0	0	-23	-3	0
2022-12-25	24	7	0	0	17	0	5	2	0	0	3	0	0	0	0	0	0	0	0	0	0	0	0	0	0	0	0	0	0	0	0	0	0	0	0	0	-4	-2	0
2022-12-26	26	5	1	0	18	2	7	1	0	0	5	1	0	0	0	0	0	0	0	0	0	0	0	0	0	0	0	0	0	0	0	0	0	0	0	0	2	2	0
2022-12-27	51	17	0	2	27	5	8	4	0	1	3	0	0	0	0	0	0	0	0	0	0	0	0	0	0	0	0	0	0	0	0	0	0	0	0	0	25	1	0
2022-12-28	62	20	0	2	33	7	8	2	0	1	1	4	0	0	0	0	0	0	0	0	0	0	0	0	0	0	0	0	0	0	0	0	0	0	0	0	11	0	0
2022-12-29	35	13	0	0	22	0	6	1	0	0	5	0	0	0	0	0	0	0	0	0	0	0	0	0	0	0	0	0	0	0	0	0	0	0	0	0	-27	-2	0
2022-12-30	49	16	3	0	29	1	8	1	1	0	6	0	0	0	0	0	0	0	0	0	0	0	0	0	0	0	0	0	0	0	0	0	0	0	0	0	14	2	0
2022-12-31	19	10	0	0	8	1	3	1	0	0	1	1	0	0	0	0	0	0	0	0	0	0	0	0	0	0	0	0	0	0	0	0	0	0	0	0	-30	-5	0
2023-01-01	14	4	1	0	7	2	3	2	0	0	0	1	0	0	0	0	0	0	0	0	0	0	0	0	0	0	0	0	0	0	0	0	0	0	0	0	-5	0	0
2023-01-02	39	12	0	1	23	3	7	3	0	0	4	0	0	0	0	0	0	0	0	0	0	0	0	0	0	0	0	0	0	0	0	0	0	0	0	0	25	4	0
2023-01-03	34	9	1	0	23	1	7	2	0	0	5	0	0	0	0	0	0	0	0	0	0	0	0	0	0	0	0	0	0	0	0	0	0	0	0	0	-5	0	0
2023-01-04	33	8	0	0	22	3	6	1	0	0	4	1	0	0	0	0	0	0	0	0	0	0	0	0	0	0	0	0	0	0	0	0	0	0	0	0	-1	-1	0
2023-01-05	39	14	1	0	21	3	6	1	0	0	4	1	0	0	0	0	0	0	0	0	0	0	0	0	0	0	0	0	0	0	0	0	0	0	0	0	6	0	0
2023-01-06	11	5	0	0	4	2	4	2	0	0	2	0	0	0	0	0	0	0	0	0	0	0	0	0	0	0	0	0	0	0	0	0	0	0	0	0	-28	-2	0
2023-01-07	17	5	0	2	10	0	3	0	0	1	2	0	0	0	0	0	0	0	0	0	0	0	0	0	0	0	0	0	0	0	0	0	0	0	0	0	6	-1	0
2023-01-08	19	6	0	0	11	2	4	0	0	0	3	1	0	0	0	0	0	0	0	0	0	0	0	0	0	0	0	0	0	0	0	0	0	0	0	0	2	1	0
2023-01-09	46	12	1	0	30	3	4	1	1	0	1	1	0	0	0	0	0	0	0	0	0	0	0	0	0	0	0	0	0	0	0	0	0	0	0	0	27	0	0
2023-01-10	38	10	3	1	21	3	5	1	2	0	2	0	0	0	0	0	0	0	0	0	0	0	0	0	0	0	0	0	0	0	0	0	0	0	0	0	-8	1	0
2023-01-11	38	8	3	2	25	0	7	3	1	0	3	0	0	0	0	0	0	0	0	0	0	0	0	0	0	0	0	0	0	0	0	0	0	0	0	0	0	2	0
2023-01-12	27	10	0	0	16	1	7	3	0	0	4	0	0	0	0	0	0	0	0	0	0	0	0	0	0	0	0	0	0	0	0	0	0	0	0	0	-11	0	0
2023-01-13	18	6	0	1	10	1	1	0	0	0	0	1	0	0	0	0	0	0	0	0	0	0	0	0	0	0	0	0	0	0	0	0	0	0	0	0	-9	-6	0
2023-01-14	14	6	2	0	5	1	6	3	1	0	2	0	0	0	0	0	0	0	0	0	0	0	0	0	0	0	0	0	0	0	0	0	0	0	0	0	-4	5	0
2023-01-15	10	4	1	0	5	0	5	1	1	0	3	0	0	0	0	0	0	0	0	0	0	0	0	0	0	0	0	0	0	0	0	0	0	0	0	0	-4	-1	0
2023-01-16	24	5	1	0	18	0	3	0	0	0	3	0	0	0	0	0	0	0	0	0	0	0	0	0	0	0	0	0	0	0	0	0	0	0	0	0	14	-2	0
2023-01-17	18	6	0	0	12	0	5	0	0	0	5	0	0	0	0	0	0	0	0	0	0	0	0	0	0	0	0	0	0	0	0	0	0	0	0	0	-6	2	0
2023-01-18	24	4	4	1	14	1	6	0	0	0	6	0	0	0	0	0	0	0	0	0	0	0	0	0	0	0	0	0	0	0	0	0	0	0	0	0	6	1	0
2023-01-19	16	5	0	0	11	0	2	1	0	0	1	0	0	0	0	0	0	0	0	0	0	0	0	0	0	0	0	0	0	0	0	0	0	0	0	0	-8	-4	0
2023-01-20	16	4	2	1	9	0	2	1	0	0	1	0	0	0	0	0	0	0	0	0	0	0	0	0	0	0	0	0	0	0	0	0	0	0	0	0	0	0	0
2023-01-21	8	1	1	1	5	0	2	0	0	1	1	0	0	0	0	0	0	0	0	0	0	0	0	0	0	0	0	0	0	0	0	0	0	0	0	0	-8	0	0
2023-01-22	11	2	3	0	6	0	2	0	1	0	1	0	0	0	0	0	0	0	0	0	0	0	0	0	0	0	0	0	0	0	0	0	0	0	0	0	3	0	0
2023-01-23	17	8	0	0	8	1	2	2	0	0	0	0	0	0	0	0	0	0	0	0	0	0	0	0	0	0	0	0	0	0	0	0	0	0	0	0	6	0	0
2023-01-24	17	4	4	1	8	0	2	1	1	0	0	0	0	0	0	0	0	0	0	0	0	0	0	0	0	0	0	0	0	0	0	0	0	0	0	0	0	0	0
2023-01-25	18	4	2	0	10	2	3	1	1	0	0	1	0	0	0	0	0	0	0	0	0	0	0	0	0	0	0	0	0	0	0	0	0	0	0	0	1	1	0
2023-01-26	13	1	4	1	6	1	3	0	0	0	2	1	0	0	0	0	0	0	0	0	0	0	0	0	0	0	0	0	0	0	0	0	0	0	0	0	-5	0	0
[truncated: 22 more columns]

## Sheet: S5_gt80yo_ASPCAT
Date	Cases						Hospitalizations						Deaths (due to COVID-19)						Deaths in-hospital (due to COVID-19)						Deaths (due to + with COVID-19)						Deaths in-hospital (due to + with COVID-19)						∆Total Cases	∆Total Hosp	∆Total Deaths
	Total	1 - 90 days	91 - 180 days	181 - 270 days	+ 270 days	No vaccine	Total	1 - 90 days	91 - 180 days	181 - 270 days	+ 270 days	No vaccine	Total	1 - 90 days	91 - 180 days	181 - 270 days	+ 270 days	No vaccine	Total	1 - 90 days	91 - 180 days	181 - 270 days	+ 270 days	No vaccine	Total	1 - 90 days	91 - 180 days	181 - 270 days	+ 270 days	No vaccine	Total	1 - 90 days	91 - 180 days	181 - 270 days	+ 270 days	No vaccine
2021-12-05	1	0	0	0	0	1	1	0	0	0	0	1	0	0	0	0	0	0	0	0	0	0	0	0	0	0	0	0	0	0	0	0	0	0	0	0
2021-12-06	1	1	0	0	0	0	0	0	0	0	0	0	0	0	0	0	0	0	0	0	0	0	0	0	0	0	0	0	0	0	0	0	0	0	0	0	0	-1	0
2021-12-07	3	3	0	0	0	0	0	0	0	0	0	0	0	0	0	0	0	0	0	0	0	0	0	0	0	0	0	0	0	0	0	0	0	0	0	0	2	0	0
2021-12-08	3	1	0	2	0	0	0	0	0	0	0	0	0	0	0	0	0	0	0	0	0	0	0	0	0	0	0	0	0	0	0	0	0	0	0	0	0	0	0			CASES					Hosp
2021-12-09	5	2	0	2	0	1	1	0	0	0	0	1	0	0	0	0	0	0	1	0	0	0	0	1	0	0	0	0	0	0	1	0	0	0	0	1	2	1	1		variant	1-3 months	4-6 months	7-9 months	10+ months	No vaccine	1-3 months	4-6 months	7-9 months
2021-12-10	4	3	0	1	0	0	1	0	0	1	0	0	0	0	0	0	0	0	0	0	0	0	0	0	0	0	0	0	0	0	0	0	0	0	0	0	-1	0	-1		BA.1	6257	1393	591	635	682	388	89	86
2021-12-11	6	3	0	3	0	0	2	0	0	2	0	0	0	0	0	0	0	0	0	0	0	0	0	0	0	0	0	0	0	0	0	0	0	0	0	0	2	1	0		BA.2	691	8242	1517	667	365	43	577	96
2021-12-12	3	1	0	1	0	1	1	0	0	0	0	1	0	0	0	0	0	0	0	0	0	0	0	0	0	0	0	0	0	0	0	0	0	0	0	0	-3	-1	0		BA.5	159	1601	17780	4023	802	15	117	1439
2021-12-13	12	8	0	3	0	1	3	2	0	1	0	0	0	0	0	0	0	0	0	0	0	0	0	0	0	0	0	0	0	0	0	0	0	0	0	0	9	2	0		BQ.1	2399	215	74	5125	367	337	48	12
2021-12-14	18	10	0	5	2	1	0	0	0	0	0	0	0	0	0	0	0	0	0	0	0	0	0	0	1	0	0	0	1	0	0	0	0	0	0	0	6	-3	1		Total	9506	11451	19962	10450	2216	783	831	1633
2021-12-15	29	10	0	15	2	2	5	1	0	3	0	1	1	0	0	0	0	1	0	0	0	0	0	0	1	0	0	0	0	1	0	0	0	0	0	0	11	5	0								% Hosp (n>n_min)
2021-12-16	49	23	0	25	0	1	8	2	0	6	0	0	0	0	0	0	0	0	1	0	0	1	0	0	0	0	0	0	0	0	2	0	0	2	0	0	20	3	1							variant	1-3 months	4-6 months	7-9 months
2021-12-17	49	35	2	6	3	3	6	4	0	0	0	2	1	1	0	0	0	0	0	0	0	0	0	0	1	1	0	0	0	0	1	1	0	0	0	0	0	-2	0			p [%]	d [%]	n_min		BA.1	6.20105	6.38909	14.5516
2021-12-18	27	13	1	9	3	1	3	3	0	0	0	0	0	0	0	0	0	0	0	0	0	0	0	0	0	0	0	0	0	0	0	0	0	0	0	0	-22	-3	-2		Hospitalizations	9.16115	4.58057	152		BA.2	6.22287	7.00073	6.32828
2021-12-19	14	5	0	6	1	2	4	1	0	1	1	1	0	0	0	0	0	0	0	0	0	0	0	0	0	0	0	0	0	0	0	0	0	0	0	0	-13	1	0		Deaths	1.14398	0.571988	1328		BA.5	9.43396	7.30793	8.09336
2021-12-20	67	34	3	17	10	3	8	4	0	3	1	0	2	0	0	0	0	2	1	0	0	1	0	0	3	0	0	0	1	2	2	0	0	2	0	0	53	4	5		Deaths in-hosp	5.74455	2.87228	252		BQ.1	14.0475	22.3256	16.2162
2021-12-21	49	25	0	15	4	5	1	0	0	1	0	0	1	0	0	0	0	1	0	0	0	0	0	0	1	0	0	0	0	1	0	0	0	0	0	0	-18	-7	-4								8.2369	7.25701	8.18054
2021-12-22	69	43	0	20	3	3	5	3	0	2	0	0	1	1	0	0	0	0	1	0	0	1	0	0	1	1	0	0	0	0	2	0	0	2	0	0	20	4	2								% Hosp (n>n_min) Upper B
2021-12-23	66	37	2	16	3	8	9	3	0	1	2	3	0	0	0	0	0	0	0	0	0	0	0	0	2	0	0	1	1	0	0	0	0	0	0	0	-3	4	-1								1-3 months	4-6 months	7-9 months
2021-12-24	65	50	3	10	2	0	8	3	0	5	0	0	1	1	0	0	0	0	0	0	0	0	0	0	2	2	0	0	0	0	0	0	0	0	0	0	-1	-1	0								6.82732	7.80378	17.6559
2021-12-25	35	25	1	4	2	3	6	3	0	2	0	1	0	0	0	0	0	0	1	0	0	1	0	0	0	0	0	0	0	0	1	0	0	1	0	0	-30	-2	-1								8.29094	7.57301	7.67323
2021-12-26	21	11	1	8	0	1	3	0	0	2	0	1	0	0	0	0	0	0	2	0	0	1	0	1	0	0	0	0	0	0	2	0	0	1	0	1	-14	-3	1								15.0823	8.694	8.50395
2021-12-27	112	80	3	16	6	7	10	4	1	2	1	2	2	0	0	1	1	0	2	2	0	0	0	0	2	0	0	1	1	0	3	3	0	0	0	0	91	7	3								15.5027	28.4875	26.6136
2021-12-28	114	94	1	10	4	5	1	0	0	1	0	0	0	0	0	0	0	0	0	0	0	0	0	0	1	1	0	0	0	0	0	0	0	0	0	0	2	-9	-4								8.80772	7.7475	8.56936
2021-12-29	146	117	5	11	2	11	8	5	0	2	0	1	1	1	0	0	0	0	1	0	0	1	0	0	1	1	0	0	0	0	1	0	0	1	0	0	32	7	1								% Hosp (n>n_min) Lower B
2021-12-30	111	77	2	20	3	9	4	0	0	2	1	1	2	0	0	0	0	2	2	0	0	1	0	1	2	0	0	0	0	2	2	0	0	1	0	1	-35	-4	2								1-3 months	4-6 months	7-9 months
2021-12-31	131	101	4	9	1	16	10	7	0	0	1	2	0	0	0	0	0	0	3	2	0	0	0	1	0	0	0	0	0	0	3	2	0	0	0	1	20	6	-1								5.61601	5.16204	11.8071
2022-01-01	104	78	1	11	4	10	7	5	0	1	0	1	1	1	0	0	0	0	0	0	0	0	0	0	1	1	0	0	0	0	0	0	0	0	0	0	-27	-3	-2								4.53976	6.45908	5.15566
2022-01-02	69	48	2	10	1	8	9	0	1	4	0	4	0	0	0	0	0	0	4	0	0	1	0	3	0	0	0	0	0	0	4	0	0	1	0	3	-35	2	3								5.37674	6.08103	7.69654
2022-01-03	187	143	6	20	5	13	11	7	1	0	1	2	1	0	0	0	0	1	2	1	0	0	0	1	1	0	0	0	0	1	3	1	0	0	0	2	118	2	0								12.6807	16.9437	8.6699
2022-01-04	184	132	8	21	10	13	19	10	1	3	2	3	1	1	0	0	0	0	0	0	0	0	0	0	1	1	0	0	0	0	0	0	0	0	0	0	-3	8	-3								7.69183	6.78839	7.80396
2022-01-05	171	126	4	20	5	16	7	3	0	1	1	2	1	1	0	0	0	0	0	0	0	0	0	0	2	2	0	0	0	0	0	0	0	0	0	0	-13	-12	1
2022-01-06	89	63	6	5	3	12	14	8	0	0	1	5	1	1	0	0	0	0	0	0	0	0	0	0	2	2	0	0	0	0	0	0	0	0	0	0	-82	7	0								1-3 months	4-6 months	7-9 months
2022-01-07	201	147	12	12	14	16	12	7	0	0	3	2	1	1	0	0	0	0	2	2	0	0	0	0	2	1	0	1	0	0	3	2	0	0	1	0	112	-2	3						BA.1	1-3 months
2022-01-08	97	74	4	10	3	6	18	11	0	4	1	2	0	0	0	0	0	0	1	0	0	0	0	1	0	0	0	0	0	0	1	0	0	0	0	1	-104	6	-4							4-6 months	0.8064
2022-01-09	95	67	8	11	2	7	8	5	0	2	1	0	2	0	1	0	0	1	1	0	0	0	1	0	2	0	1	0	0	1	1	0	0	0	1	0	-2	-10	2							7-9 months	1e-12	1e-08
2022-01-10	221	169	12	20	6	14	13	5	1	1	0	6	1	0	0	0	1	0	0	0	0	0	0	0	1	0	0	0	1	0	0	0	0	0	0	0	126	5	-2							10+ months	1e-07	1e-05	0.2055
2022-01-11	287	199	23	29	16	20	14	5	0	3	1	5	1	1	0	0	0	0	5	0	0	1	1	3	1	1	0	0	0	0	5	0	0	1	1	3	66	1	5							No vaccine	1e-34	1e-23	0.0014
2022-01-12	232	165	17	18	6	26	21	11	0	3	0	7	2	1	0	0	0	1	2	1	0	0	0	1	3	1	0	0	0	2	2	1	0	0	0	1	-55	7	-1						BA.2	1-3 months
2022-01-13	228	169	13	14	12	20	16	9	0	2	3	2	0	0	0	0	0	0	1	1	0	0	0	0	0	0	0	0	0	0	2	1	0	0	1	0	-4	-5	-3							4-6 months	0.4833
2022-01-14	169	121	17	5	16	10	11	7	1	0	1	2	1	1	0	0	0	0	1	1	0	0	0	0	2	1	0	0	0	1	2	2	0	0	0	0	-59	-5	2							7-9 months	1	0.3776
2022-01-15	141	109	4	12	6	10	13	8	1	0	1	3	1	0	0	0	0	1	2	1	0	0	0	1	1	0	0	0	0	1	2	1	0	0	0	1	-28	2	-1							10+ months	0.0001	1e-05	1e-05
2022-01-16	109	80	11	4	4	10	13	6	0	2	0	5	1	1	0	0	0	0	4	1	0	0	0	3	1	1	0	0	0	0	4	1	0	0	0	3	-32	0	2							No vaccine	1e-10	1e-13	1e-12
2022-01-17	277	199	34	10	17	17	21	11	1	3	2	4	2	1	0	0	1	0	3	3	0	0	0	0	3	2	0	0	1	0	6	4	0	0	0	2	168	8	4						BA.5	1-3 months
2022-01-18	282	190	35	24	18	15	24	13	1	3	4	3	1	0	0	0	0	1	3	1	0	0	1	1	1	0	0	0	0	1	4	2	0	0	1	1	5	3	-4							4-6 months	0.3422
2022-01-19	236	168	15	11	24	18	29	16	2	4	4	3	0	0	0	0	0	0	5	1	1	1	1	1	1	1	0	0	0	0	6	1	2	1	1	1	-46	5	2							7-9 months	0.5575	0.2907
2022-01-20	228	160	19	10	25	14	18	13	1	0	4	0	3	2	1	0	0	0	1	0	0	0	1	0	3	2	1	0	0	0	3	1	0	0	2	0	-8	-11	-1							10+ months	0.8878	0.0347	0.0426
2022-01-21	222	154	26	9	13	20	17	6	0	3	2	6	2	1	0	1	0	0	2	1	0	0	1	0	2	1	0	1	0	0	3	1	0	0	2	0	-6	-1	-1							No vaccine	0.1267	1e-07	1e-09
2022-01-22	160	116	20	5	12	7	11	7	1	1	0	2	1	1	0	0	0	0	0	0	0	0	0	0	1	1	0	0	0	0	0	0	0	0	0	0	-62	-6	-4						BQ.1	1-3 months
2022-01-23	144	103	15	3	11	12	10	6	0	0	1	3	0	0	0	0	0	0	1	1	0	0	0	0	0	0	0	0	0	0	2	2	0	0	0	0	-16	-1	1							4-6 months	0.0018
2022-01-24	297	222	31	7	20	17	16	8	1	1	3	3	1	0	1	0	0	0	2	0	0	0	1	1	1	0	1	0	0	0	2	0	0	0	1	1	153	6	1							7-9 months	0.6101	0.199
2022-01-25	262	172	35	5	28	22	16	9	0	1	0	6	2	1	0	0	1	0	6	1	0	1	0	4	2	1	0	0	1	0	6	1	0	1	0	4	-35	0	5							10+ months	0.9152	0.0015	0.6141
2022-01-26	255	165	43	8	22	17	19	11	1	1	2	4	1	1	0	0	0	0	3	2	0	0	1	0	1	1	0	0	0	0	3	2	0	0	1	0	-7	3	-4							No vaccine	1e-05	0.9185	0.221
2022-01-27	250	167	34	4	26	19	29	15	3	0	3	8	1	0	1	0	0	0	2	1	0	0	0	1	1	0	1	0	0	0	4	1	1	0	0	2	-5	10	1						Total	1-3 months
2022-01-28	226	153	26	1	28	18	19	10	3	0	4	2	0	0	0	0	0	0	2	0	1	0	0	1	1	1	0	0	0	0	2	0	1	0	0	1	-24	-10	-2							4-6 months	0.0086
2022-01-29	145	95	25	4	10	11	7	4	0	0	1	2	0	0	0	0	0	0	0	0	0	0	0	0	0	0	0	0	0	0	0	0	0	0	0	0	-81	-12	-3							7-9 months	0.8737	0.0035
2022-01-30	128	91	15	4	6	12	17	11	2	0	2	2	3	0	1	0	0	2	2	1	1	0	0	0	3	0	1	0	0	2	2	1	1	0	0	0	-17	10	5							10+ months	1e-18	1e-32	1e-25
2022-01-31	264	178	33	4	26	23	18	8	1	1	2	6	1	0	0	0	1	0	1	0	0	0	0	1	2	1	0	0	1	0	1	0	0	0	0	1	136	1	-2							No vaccine	1e-43	1e-56	1e-49
2022-02-01	215	129	57	5	9	15	14	8	2	0	1	3	1	1	0	0	0	0	1	0	1	0	0	0	1	1	0	0	0	0	1	0	1	0	0	0	-49	-4	-1
2022-02-02	205	126	46	1	17	15	14	8	3	0	2	1	3	2	0	0	1	0	3	3	0	0	0	0	3	2	0	0	1	0	3	3	0	0	0	0	-10	0	4								1-3 months	4-6 months	7-9 months
2022-02-03	225	141	53	5	16	10	14	7	5	1	1	0	0	0	0	0	0	0	1	0	1	0	0	0	1	1	0	0	0	0	1	0	1	0	0	0	20	0	-4						BA.1	1-RR	71.2305	70.3581	32.4885
2022-02-04	238	134	71	3	19	11	21	11	4	1	3	2	1	0	1	0	0	0	3	2	0	0	1	0	1	0	1	0	0	0	5	2	1	0	2	0	13	7	4							err pos (1-RR)	5.25355	7.96335	17.6896
2022-02-05	134	78	36	1	10	9	12	10	0	0	0	2	1	1	0	0	0	0	1	1	0	0	0	0	1	1	0	0	0	0	1	1	0	0	0	0	-104	-9	-4							err neg (1-RR)	4.87158	7.05556	15.8823
2022-02-06	90	45	32	0	9	4	10	6	4	0	0	0	1	1	0	0	0	0	0	0	0	0	0	0	1	1	0	0	0	0	0	0	0	0	0	0	-44	-2	-1
2022-02-07	198	91	66	1	21	19	18	7	4	0	2	5	2	1	0	0	0	1	0	0	0	0	0	0	2	1	0	0	0	1	3	3	0	0	0	0	108	8	4						BA.2	1-RR	67.5522	63.4962	67.0025
2022-02-08	224	113	84	6	10	11	17	5	10	2	0	0	2	1	1	0	0	0	1	0	1	0	0	0	3	1	2	0	0	0	1	0	1	0	0	0	26	-1	-1							err pos (1-RR)	13.1229	8.92667	10.345
2022-02-09	171	80	66	0	15	10	15	7	4	0	2	2	1	0	0	0	1	0	1	0	1	0	0	0	1	0	0	0	1	0	2	0	1	0	0	1	-53	-2	-1							err neg (1-RR)	10.992	7.96325	9.09307
2022-02-10	221	91	78	3	30	19	15	5	2	0	4	4	1	0	1	0	0	0	2	0	1	0	1	0	1	0	1	0	0	0	3	1	1	0	1	0	50	0	1
2022-02-11	148	59	67	1	14	7	13	2	5	0	2	4	2	0	1	0	1	0	2	1	1	0	0	0	2	0	1	0	1	0	2	1	1	0	0	0	-73	-2	0						BA.5	1-RR	34.2084	49.0351	43.5576
2022-02-12	99	41	49	0	5	4	7	3	4	0	0	0	1	0	0	0	1	0	0	0	0	0	0	0	1	0	0	0	1	0	1	1	0	0	0	0	-49	-6	-2							err pos (1-RR)	41.183	13.4192	10.6987
2022-02-13	69	23	37	2	2	5	10	1	8	0	0	1	0	0	0	0	0	0	1	0	1	0	0	0	0	0	0	0	0	0	1	0	1	0	0	0	-30	3	-1							err neg (1-RR)	30.2849	11.9653	9.66763
2022-02-14	164	78	69	2	8	7	23	8	10	1	2	2	0	0	0	0	0	0	2	0	1	1	0	0	0	0	0	0	0	0	2	0	1	1	0	0	95	13	1
2022-02-15	135	53	62	0	8	12	17	6	8	0	0	3	1	1	0	0	0	0	0	0	0	0	0	0	1	1	0	0	0	0	0	0	0	0	0	0	-29	-6	-1						BQ.1	1-RR	38.6257	2.45847	29.1506
2022-02-16	118	35	64	0	6	13	13	2	6	0	1	4	1	0	0	0	0	1	0	0	0	0	0	0	1	0	0	0	0	1	0	0	0	0	0	0	-17	-4	0							err pos (1-RR)	13.9821	33.4137	47.6469
2022-02-17	130	49	72	0	8	1	16	7	9	0	0	0	0	0	0	0	0	0	0	0	0	0	0	0	0	0	0	0	0	0	0	0	0	0	0	0	12	3	-1							err neg (1-RR)	12.7487	29.5525	35.4416
2022-02-18	145	48	73	1	10	13	10	1	7	0	0	2	0	0	0	0	0	0	1	0	0	0	0	1	0	0	0	0	0	0	1	0	0	0	0	1	15	-6	1
2022-02-19	64	16	38	1	4	5	9	0	6	0	1	2	0	0	0	0	0	0	0	0	0	0	0	0	0	0	0	0	0	0	0	0	0	0	0	0	-81	-1	-1						Total	1-RR	56.1227	61.3425	56.4229
2022-02-20	52	20	29	0	1	2	3	1	1	0	1	0	0	0	0	0	0	0	1	0	1	0	0	0	0	0	0	0	0	0	1	0	1	0	0	0	-12	-6	1							err pos (1-RR)	4.98354	4.35062	4.43476
2022-02-21	123	31	71	2	10	9	8	0	4	0	1	3	1	0	0	0	1	0	2	0	1	0	0	1	1	0	0	0	1	0	2	0	1	0	0	1	71	5	2							err neg (1-RR)	4.98354	4.35062	4.43476
2022-02-22	102	26	66	0	2	8	7	0	3	0	1	3	0	0	0	0	0	0	1	0	0	0	0	1	0	0	0	0	0	0	1	0	0	0	0	1	-21	-1	-2
2022-02-23	115	26	77	0	6	6	6	0	5	0	0	1	0	0	0	0	0	0	0	0	0	0	0	0	0	0	0	0	0	0	0	0	0	0	0	0	13	-1	-1
2022-02-24	97	28	56	0	9	4	8	0	4	0	1	3	0	0	0	0	0	0	0	0	0	0	0	0	0	0	0	0	0	0	0	0	0	0	0	0	-18	2	0							Average numbers
2022-02-25	118	17	92	0	6	3	9	0	8	0	0	1	2	0	2	0	0	0	1	0	1	0	0	0	3	0	3	0	0	0	2	0	2	0	0	0	21	1	5							Cases	Hosp	Deaths (due to + with)	in-Hosp Deaths (due to + with)
2022-02-26	60	10	42	0	4	4	6	0	6	0	0	0	0	0	0	0	0	0	1	0	1	0	0	0	1	0	1	0	0	0	1	0	1	0	0	0	-58	-3	-3						BA.1 emerg	70.8148	5.88889	1.81481	0.962963
2022-02-27	42	11	26	0	2	3	6	1	3	0	1	1	0	0	0	0	0	0	1	0	1	0	0	0	0	0	0	0	0	0	2	1	1	0	0	0	-18	0	0						BA.1 dom	198.429	15.9714	3.82857	2.37143
2022-02-28	144	26	104	1	11	2	10	3	6	0	1	0	0	0	0	0	0	0	1	0	1	0	0	0	0	0	0	0	0	0	1	0	1	0	0	0	102	4	-1						BA.2 emerg	107.51	9.50847	1.32	0.7
2022-03-01	109	21	75	0	6	7	9	3	5	0	0	1	0	0	0	0	0	0	0	0	0	0	0	0	0	0	0	0	0	0	1	0	1	0	0	0	-35	-1	0						BA.2 dom	143.457	9.23404	1.31083	0.54
2022-03-02	104	16	76	0	8	4	8	1	4	0	0	3	0	0	0	0	0	0	1	0	1	0	0	0	0	0	0	0	0	0	1	0	1	0	0	0	-5	-1	0						BA.5 emerg	276.628	22.359	3.01282	1.0641
2022-03-03	112	18	82	0	9	3	13	0	11	0	1	1	0	0	0	0	0	0	1	0	1	0	0	0	0	0	0	0	0	0	1	0	1	0	0	0	8	5	0						BA.5 dom	56.4364	5.87273	0.872727	0.327273
2022-03-04	112	12	89	0	8	3	6	1	1	0	4	0	0	0	0	0	0	0	1	0	1	0	0	0	0	0	0	0	0	0	1	0	1	0	0	0	0	-7	0						BQ.1 emerg	79.9333	9.93333	0.386667	0.213333
2022-03-05	68	9	55	0	3	1	3	0	2	0	1	0	0	0	0	0	0	0	0	0	0	0	0	0	0	0	0	0	0	0	0	0	0	0	0	0	-44	-3	-1						BQ.1 dom	45.5208	9.625	0	0
2022-03-06	40	2	33	0	2	3	3	0	2	0	0	1	0	0	0	0	0	0	0	0	0	0	0	0	0	0	0	0	0	0	0	0	0	0	0	0	-28	0	0								∆Total Cases	∆Total Hosp	∆Total Deaths
2022-03-07	161	19	122	1	14	5	11	0	9	0	1	1	0	0	0	0	0	0	0	0	0	0	0	0	0	0	0	0	0	0	0	0	0	0	0	0	121	8	0
2022-03-08	101	11	80	0	6	4	4	0	2	0	2	0	0	0	0	0	0	0	0	0	0	0	0	0	2	0	1	0	0	1	0	0	0	0	0	0	-60	-7	2							BA.1 emerg	6.14815	0.23	0.037037
2022-03-09	114	20	82	0	11	1	11	3	8	0	0	0	1	0	1	0	0	0	0	0	0	0	0	0	1	0	1	0	0	0	0	0	0	0	0	0	13	7	-1							BA.1 dom	1.55882	0.22	0.0285714
2022-03-10	123	13	90	0	16	4	5	1	4	0	0	0	0	0	0	0	0	0	0	0	0	0	0	0	1	0	0	0	0	1	0	0	0	0	0	0	9	-6	0							BA.2 emerg	-1.63265	-0.216667	-0.0408163
2022-03-11	126	10	106	0	6	4	9	1	7	0	0	1	0	0	0	0	0	0	0	0	0	0	0	0	0	0	0	0	0	0	1	0	1	0	0	0	3	4	0							BA.2 dom	0.521739	-0.12766	0
2022-03-12	67	4	50	0	9	4	8	2	5	0	1	0	1	0	0	0	1	0	0	0	0	0	0	0	1	0	0	0	1	0	0	0	0	0	0	0	-59	-1	0							BA.5 emerg	0.128205	-0.025641	0
2022-03-13	61	7	49	0	5	0	4	0	4	0	0	0	0	0	0	0	0	0	0	0	0	0	0	0	0	0	0	0	0	0	0	0	0	0	0	0	-6	-4	-1							BA.5 dom	-1.63636	-0.0727273	0
2022-03-14	165	13	137	1	9	5	14	1	11	1	0	1	0	0	0	0	0	0	1	0	1	0	0	0	0	0	0	0	0	0	1	0	1	0	0	0	104	10	1							BQ.1 emerg	1.18667	0.28	0
2022-03-15	140	9	122	2	5	2	11	0	7	0	3	1	0	0	0	0	0	0	0	0	0	0	0	0	0	0	0	0	0	0	1	0	1	0	0	0	-25	-3	0							BQ.1 dom	-2.20833	-0.520833	-0.0208333
2022-03-16	133	9	113	1	6	4	9	1	6	0	0	2	0	0	0	0	0	0	0	0	0	0	0	0	1	0	1	0	0	0	0	0	0	0	0	0	-7	-2	0
2022-03-17	118	6	102	0	6	4	9	0	8	0	1	0	0	0	0	0	0	0	1	0	1	0	0	0	0	0	0	0	0	0	1	0	1	0	0	0	-15	0	0
2022-03-18	124	5	110	1	6	2	3	0	2	1	0	0	0	0	0	0	0	0	0	0	0	0	0	0	1	0	1	0	0	0	0	0	0	0	0	0	6	-6	0
2022-03-19	69	1	58	0	9	1	5	0	3	0	2	0	0	0	0	0	0	0	0	0	0	0	0	0	1	0	0	0	0	1	0	0	0	0	0	0	-55	2	0
2022-03-20	65	3	57	0	4	1	9	1	8	0	0	0	0	0	0	0	0	0	0	0	0	0	0	0	0	0	0	0	0	0	0	0	0	0	0	0	-4	4	-1
2022-03-21	139	2	117	1	14	5	13	0	11	0	1	1	0	0	0	0	0	0	1	0	1	0	0	0	1	0	1	0	0	0	1	0	1	0	0	0	74	4	2
2022-03-22	106	5	90	1	7	3	8	0	7	0	0	1	1	0	0	0	0	1	0	0	0	0	0	0	1	0	0	0	0	1	0	0	0	0	0	0	-33	-5	-1
2022-03-23	131	3	113	3	10	2	3	1	1	0	1	0	0	0	0	0	0	0	0	0	0	0	0	0	0	0	0	0	0	0	0	0	0	0	0	0	25	-5	-1
2022-03-24	107	5	91	1	7	3	6	0	6	0	0	0	0	0	0	0	0	0	0	0	0	0	0	0	1	0	1	0	0	0	0	0	0	0	0	0	-24	3	1
2022-03-25	125	3	106	2	8	6	8	0	6	1	1	0	0	0	0	0	0	0	0	0	0	0	0	0	0	0	0	0	0	0	0	0	0	0	0	0	18	2	-1
2022-03-26	60	2	49	0	6	3	4	0	4	0	0	0	0	0	0	0	0	0	0	0	0	0	0	0	1	1	0	0	0	0	0	0	0	0	0	0	-65	-4	1
2022-03-27	43	2	30	1	8	2	5	0	1	0	4	0	0	0	0	0	0	0	0	0	0	0	0	0	0	0	0	0	0	0	0	0	0	0	0	0	-17	1	-1
2022-03-28	105	0	93	2	6	4	10	0	7	0	1	2	1	0	1	0	0	0	0	0	0	0	0	0	2	0	2	0	0	0	0	0	0	0	0	0	62	5	2
2022-03-29	103	3	79	5	11	5	10	0	8	0	2	0	0	0	0	0	0	0	0	0	0	0	0	0	1	0	1	0	0	0	0	0	0	0	0	0	-2	0	-1
2022-03-30	91	2	79	1	6	3	11	0	8	0	2	1	0	0	0	0	0	0	1	0	1	0	0	0	0	0	0	0	0	0	1	0	1	0	0	0	-12	1	0
2022-03-31	78	1	71	2	1	3	8	0	8	0	0	0	1	0	1	0	0	0	0	0	0	0	0	0	1	0	1	0	0	0	0	0	0	0	0	0	-13	-3	0
2022-04-01	87	2	70	4	7	4	4	0	1	1	2	0	0	0	0	0	0	0	0	0	0	0	0	0	0	0	0	0	0	0	0	0	0	0	0	0	9	-4	-1
2022-04-02	35	0	30	0	5	0	1	0	1	0	0	0	0	0	0	0	0	0	0	0	0	0	0	0	0	0	0	0	0	0	0	0	0	0	0	0	-52	-3	0
2022-04-03	39	2	33	0	4	0	5	0	3	0	2	0	0	0	0	0	0	0	0	0	0	0	0	0	1	0	1	0	0	0	0	0	0	0	0	0	4	4	1
2022-04-04	125	1	106	3	9	6	12	0	11	0	1	0	0	0	0	0	0	0	1	0	1	0	0	0	0	0	0	0	0	0	2	0	2	0	0	0	86	7	1
2022-04-05	115	3	100	4	4	4	12	1	8	1	1	1	0	0	0	0	0	0	0	0	0	0	0	0	1	0	1	0	0	0	0	0	0	0	0	0	-10	0	-1
2022-04-06	95	3	79	4	4	5	4	0	3	0	0	1	0	0	0	0	0	0	0	0	0	0	0	0	1	0	1	0	0	0	0	0	0	0	0	0	-20	-8	0
2022-04-07	125	2	113	3	4	3	6	0	6	0	0	0	1	0	0	1	0	0	1	0	1	0	0	0	2	0	1	1	0	0	1	0	1	0	0	0	30	2	2
2022-04-08	123	2	97	11	7	6	5	0	4	0	1	0	1	1	0	0	0	0	0	0	0	0	0	0	1	1	0	0	0	0	0	0	0	0	0	0	-2	-1	-2
2022-04-09	64	0	56	3	2	3	10	0	9	0	1	0	0	0	0	0	0	0	1	0	1	0	0	0	0	0	0	0	0	0	2	0	2	0	0	0	-59	5	1
2022-04-10	52	1	48	1	1	1	12	0	11	0	0	1	1	0	1	0	0	0	2	0	1	0	0	1	1	0	1	0	0	0	3	0	2	0	0	1	-12	2	2
2022-04-11	160	1	142	8	7	2	10	0	7	0	2	1	0	0	0	0	0	0	0	0	0	0	0	0	0	0	0	0	0	0	0	0	0	0	0	0	108	-2	-4
2022-04-12	159	4	128	8	10	9	17	1	12	0	1	3	0	0	0	0	0	0	1	0	1	0	0	0	2	0	1	0	1	0	1	0	1	0	0	0	-1	7	3
2022-04-13	138	0	116	10	6	6	8	0	5	0	1	2	1	0	1	0	0	0	0	0	0	0	0	0	1	0	1	0	0	0	0	0	0	0	0	0	-21	-9	-2
2022-04-14	140	1	113	8	13	5	11	1	8	0	1	1	0	0	0	0	0	0	1	0	0	0	0	1	0	0	0	0	0	0	1	0	0	0	0	1	2	3	0
2022-04-15	49	2	40	4	2	1	8	0	7	0	0	1	0	0	0	0	0	0	0	0	0	0	0	0	0	0	0	0	0	0	0	0	0	0	0	0	-91	-3	-1
2022-04-16	88	1	75	6	3	3	10	0	10	0	0	0	0	0	0	0	0	0	2	0	2	0	0	0	1	0	1	0	0	0	2	0	2	0	0	0	39	2	3
2022-04-17	68	0	62	1	4	1	9	0	8	0	1	0	0	0	0	0	0	0	0	0	0	0	0	0	0	0	0	0	0	0	0	0	0	0	0	0	-20	-1	-3
2022-04-18	84	1	74	3	4	2	6	0	5	0	1	0	0	0	0	0	0	0	0	0	0	0	0	0	1	0	1	0	0	0	0	0	0	0	0	0	16	-3	1
2022-04-19	224	2	189	13	14	6	18	0	14	0	3	1	1	0	1	0	0	0	0	0	0	0	0	0	1	0	1	0	0	0	0	0	0	0	0	0	140	12	0
2022-04-20	183	4	153	15	7	4	8	0	6	1	1	0	0	0	0	0	0	0	0	0	0	0	0	0	0	0	0	0	0	0	0	0	0	0	0	0	-41	-10	-1
2022-04-21	127	1	114	6	4	2	11	0	9	1	0	1	0	0	0	0	0	0	0	0	0	0	0	0	2	0	1	0	1	0	0	0	0	0	0	0	-56	3	2
2022-04-22	162	1	146	7	4	4	11	1	9	0	1	0	0	0	0	0	0	0	0	0	0	0	0	0	0	0	0	0	0	0	0	0	0	0	0	0	35	0	-2
2022-04-23	72	1	60	2	7	2	5	0	5	0	0	0	0	0	0	0	0	0	0	0	0	0	0	0	0	0	0	0	0	0	0	0	0	0	0	0	-90	-6	0
2022-04-24	57	1	46	3	6	1	6	0	4	0	2	0	2	0	2	0	0	0	0	0	0	0	0	0	3	0	3	0	0	0	1	0	0	0	1	0	-15	1	4
2022-04-25	217	1	170	27	16	3	14	1	11	0	1	1	1	0	0	1	0	0	1	0	1	0	0	0	2	0	1	1	0	0	1	0	1	0	0	0	160	8	-1
2022-04-26	169	2	144	8	9	6	18	1	11	3	1	2	2	0	2	0	0	0	1	0	1	0	0	0	2	0	2	0	0	0	2	1	1	0	0	0	-48	4	1
2022-04-27	187	0	144	28	11	4	7	0	7	0	0	0	2	0	2	0	0	0	0	0	0	0	0	0	2	0	2	0	0	0	0	0	0	0	0	0	18	-11	-2
2022-04-28	169	2	130	26	9	2	12	0	8	2	1	1	0	0	0	0	0	0	1	0	1	0	0	0	0	0	0	0	0	0	1	0	1	0	0	0	-18	5	-1
2022-04-29	197	0	148	29	16	4	9	0	6	2	0	1	0	0	0	0	0	0	0	0	0	0	0	0	0	0	0	0	0	0	0	0	0	0	0	0	28	-3	-1
2022-04-30	93	1	66	14	6	6	12	0	8	1	2	1	0	0	0	0	0	0	0	0	0	0	0	0	0	0	0	0	0	0	0	0	0	0	0	0	-104	3	0
2022-05-01	81	0	61	12	5	3	9	0	4	3	2	0	1	0	1	0	0	0	1	0	0	1	0	0	1	0	1	0	0	0	1	0	0	1	0	0	-12	-3	2
2022-05-02	277	1	205	53	8	10	10	0	8	1	0	1	1	0	0	1	0	0	0	0	0	0	0	0	2	0	0	2	0	0	0	0	0	0	0	0	196	1	0
2022-05-03	190	1	117	52	13	7	12	0	6	2	2	2	0	0	0	0	0	0	0	0	0	0	0	0	1	0	1	0	0	0	0	0	0	0	0	0	-87	2	-1
2022-05-04	207	0	126	68	8	5	10	0	7	2	1	0	0	0	0	0	0	0	0	0	0	0	0	0	1	0	1	0	0	0	0	0	0	0	0	0	17	-2	0
2022-05-05	233	1	129	91	9	3	22	0	8	11	3	0	0	0	0	0	0	0	2	0	1	1	0	0	1	0	1	0	0	0	2	0	1	1	0	0	26	12	2
2022-05-06	200	2	124	64	8	2	10	0	4	5	0	1	0	0	0	0	0	0	0	0	0	0	0	0	0	0	0	0	0	0	0	0	0	0	0	0	-33	-12	-3
2022-05-07	97	0	58	30	6	3	7	0	2	5	0	0	0	0	0	0	0	0	1	0	0	1	0	0	0	0	0	0	0	0	1	0	0	1	0	0	-103	-3	1
2022-05-08	85	0	53	28	1	3	16	0	11	4	0	1	1	0	1	0	0	0	1	0	1	0	0	0	1	0	1	0	0	0	2	0	1	1	0	0	-12	9	2
2022-05-09	290	4	171	97	14	4	20	0	16	3	1	0	0	0	0	0	0	0	0	0	0	0	0	0	0	0	0	0	0	0	0	0	0	0	0	0	205	4	-3
2022-05-10	277	2	147	108	16	4	21	0	12	9	0	0	0	0	0	0	0	0	1	0	0	1	0	0	1	0	0	0	1	0	1	0	0	1	0	0	-13	1	2
2022-05-11	270	1	131	129	6	3	9	0	3	4	1	1	0	0	0	0	0	0	0	0	0	0	0	0	0	0	0	0	0	0	0	0	0	0	0	0	-7	-12	-2
2022-05-12	211	2	78	116	10	5	14	0	1	11	1	1	1	0	1	0	0	0	2	0	1	1	0	0	1	0	1	0	0	0	2	0	1	1	0	0	-59	5	3
2022-05-13	258	0	122	116	14	6	13	0	5	5	2	1	0	0	0	0	0	0	0	0	0	0	0	0	1	0	1	0	0	0	0	0	0	0	0	0	47	-1	-2
2022-05-14	127	1	51	56	12	7	17	0	7	5	3	2	0	0	0	0	0	0	0	0	0	0	0	0	0	0	0	0	0	0	0	0	0	0	0	0	-131	4	-1
2022-05-15	115	1	56	54	1	3	10	0	4	5	0	1	0	0	0	0	0	0	0	0	0	0	0	0	1	0	0	1	0	0	0	0	0	0	0	0	-12	-7	1
2022-05-16	316	1	143	154	12	6	16	0	10	6	0	0	3	0	0	2	0	1	0	0	0	0	0	0	3	0	0	2	0	1	0	0	0	0	0	0	201	6	2
2022-05-17	277	1	119	143	10	4	18	0	10	6	1	1	0	0	0	0	0	0	0	0	0	0	0	0	0	0	0	0	0	0	0	0	0	0	0	0	-39	2	-3
2022-05-18	237	1	82	131	9	14	16	0	5	8	0	3	0	0	0	0	0	0	1	0	0	1	0	0	0	0	0	0	0	0	1	0	0	1	0	0	-40	-2	1
2022-05-19	231	1	84	124	16	6	15	0	2	11	1	1	0	0	0	0	0	0	0	0	0	0	0	0	0	0	0	0	0	0	0	0	0	0	0	0	-6	-1	-1
2022-05-20	278	1	96	149	19	13	17	0	10	5	1	1	1	0	0	1	0	0	0	0	0	0	0	0	1	0	0	1	0	0	0	0	0	0	0	0	47	2	1
2022-05-21	123	1	39	68	10	5	5	0	0	4	1	0	0	0	0	0	0	0	0	0	0	0	0	0	0	0	0	0	0	0	1	0	0	1	0	0	-155	-12	0
2022-05-22	80	2	16	49	6	7	8	0	1	4	2	1	2	0	1	1	0	0	0	0	0	0	0	0	2	0	1	1	0	0	0	0	0	0	0	0	-43	3	1
2022-05-23	287	3	86	170	14	14	16	0	8	7	0	1	2	0	0	2	0	0	0	0	0	0	0	0	5	0	1	3	1	0	0	0	0	0	0	0	207	8	3
2022-05-24	207	0	46	140	16	5	15	0	2	11	2	0	1	0	0	1	0	0	0	0	0	0	0	0	1	0	0	1	0	0	0	0	0	0	0	0	-80	-1	-4
2022-05-25	179	1	41	120	13	4	10	0	3	6	1	0	0	0	0	0	0	0	0	0	0	0	0	0	1	0	0	1	0	0	0	0	0	0	0	0	-28	-5	0
2022-05-26	209	2	42	143	17	5	18	0	1	13	4	0	0	0	0	0	0	0	0	0	0	0	0	0	0	0	0	0	0	0	0	0	0	0	0	0	30	8	-1
2022-05-27	190	0	40	131	14	5	17	0	3	10	4	0	0	0	0	0	0	0	0	0	0	0	0	0	0	0	0	0	0	0	0	0	0	0	0	0	-19	-1	0
2022-05-28	104	2	17	80	3	2	9	0	1	7	0	1	1	0	0	1	0	0	0	0	0	0	0	0	1	0	0	1	0	0	0	0	0	0	0	0	-86	-8	1
2022-05-29	81	2	19	57	3	0	8	0	2	6	0	0	0	0	0	0	0	0	0	0	0	0	0	0	0	0	0	0	0	0	0	0	0	0	0	0	-23	-1	-1
2022-05-30	301	2	58	209	16	16	13	0	5	7	1	0	2	0	1	1	0	0	0	0	0	0	0	0	2	0	1	1	0	0	0	0	0	0	0	0	220	5	2
2022-05-31	251	1	36	191	15	8	11	0	3	5	1	2	2	0	0	2	0	0	2	0	0	1	1	0	4	0	1	2	0	1	2	0	0	1	1	0	-50	-2	4
2022-06-01	222	2	32	172	9	7	18	0	0	14	3	1	1	0	0	1	0	0	0	0	0	0	0	0	1	0	0	1	0	0	0	0	0	0	0	0	-29	7	-5
2022-06-02	235	1	27	185	9	13	15	0	1	12	0	2	0	0	0	0	0	0	0	0	0	0	0	0	1	0	0	1	0	0	1	0	1	0	0	0	13	-3	1
2022-06-03	202	0	29	164	5	4	6	0	3	3	0	0	0	0	0	0	0	0	0	0	0	0	0	0	0	0	0	0	0	0	0	0	0	0	0	0	-33	-9	-2
2022-06-04	130	2	14	98	12	4	15	0	1	10	2	2	0	0	0	0	0	0	0	0	0	0	0	0	0	0	0	0	0	0	1	0	0	0	1	0	-72	9	1
2022-06-05	138	1	16	110	5	6	10	0	1	9	0	0	0	0	0	0	0	0	0	0	0	0	0	0	1	0	0	1	0	0	0	0	0	0	0	0	8	-5	0
2022-06-06	158	0	21	132	4	1	20	0	4	16	0	0	0	0	0	0	0	0	0	0	0	0	0	0	0	0	0	0	0	0	1	0	0	1	0	0	20	10	0
2022-06-07	337	1	39	272	15	10	24	0	4	18	1	1	0	0	0	0	0	0	0	0	0	0	0	0	0	0	0	0	0	0	0	0	0	0	0	0	179	4	-1
2022-06-08	268	3	28	211	15	11	14	0	1	10	1	2	0	0	0	0	0	0	0	0	0	0	0	0	0	0	0	0	0	0	0	0	0	0	0	0	-69	-10	0
2022-06-09	241	3	21	202	9	6	15	0	3	12	0	0	0	0	0	0	0	0	1	0	0	1	0	0	0	0	0	0	0	0	1	0	0	1	0	0	-27	1	1
2022-06-10	262	1	23	218	12	8	19	0	1	14	2	2	1	0	0	1	0	0	1	0	0	0	1	0	4	0	1	2	0	1	1	0	0	0	1	0	21	4	4
2022-06-11	128	0	16	102	5	5	17	0	2	15	0	0	1	0	0	1	0	0	0	0	0	0	0	0	2	0	0	2	0	0	0	0	0	0	0	0	-134	-2	-3
2022-06-12	114	1	16	82	13	2	13	0	2	9	2	0	1	0	0	1	0	0	0	0	0	0	0	0	2	0	0	2	0	0	0	0	0	0	0	0	-14	-4	0
2022-06-13	307	2	28	245	18	14	17	0	1	14	1	1	0	0	0	0	0	0	0	0	0	0	0	0	1	0	0	1	0	0	0	0	0	0	0	0	193	4	-1
2022-06-14	293	2	34	231	16	10	15	0	3	11	1	0	0	0	0	0	0	0	1	0	1	0	0	0	0	0	0	0	0	0	1	0	1	0	0	0	-14	-2	0
2022-06-15	297	6	14	255	15	7	26	0	2	22	1	1	1	0	1	0	0	0	1	0	0	1	0	0	2	0	1	1	0	0	1	0	0	1	0	0	4	11	2
2022-06-16	295	1	21	251	15	7	22	0	1	17	1	3	3	0	0	2	1	0	0	0	0	0	0	0	4	0	0	3	1	0	2	0	0	2	0	0	-2	-4	3
2022-06-17	327	2	20	281	13	11	25	0	3	19	2	1	2	0	0	2	0	0	0	0	0	0	0	0	4	0	0	4	0	0	0	0	0	0	0	0	32	3	-2
2022-06-18	195	1	14	174	3	3	21	1	0	19	0	1	2	0	0	2	0	0	1	0	0	1	0	0	3	0	1	2	0	0	1	0	0	1	0	0	-132	-4	0
2022-06-19	197	0	6	167	10	14	30	0	0	24	5	1	3	0	0	1	1	1	1	0	0	0	1	0	3	0	0	1	1	1	1	0	0	0	1	0	2	9	0
2022-06-20	495	3	22	427	29	14	32	1	2	26	1	2	1	0	0	0	1	0	2	0	0	2	0	0	1	0	0	0	1	0	3	0	0	3	0	0	298	2	0
2022-06-21	481	4	16	427	23	11	32	0	1	31	0	0	1	0	0	1	0	0	0	0	0	0	0	0	3	0	0	1	2	0	0	0	0	0	0	0	-14	0	-1
2022-06-22	520	4	25	440	32	19	27	0	2	19	3	3	1	0	0	1	0	0	3	0	0	2	0	1	5	0	0	5	0	0	3	0	0	2	0	1	39	-5	5
2022-06-23	514	3	21	442	34	14	36	0	1	29	2	4	2	0	0	2	0	0	2	0	0	1	0	1	4	0	0	4	0	0	3	0	0	2	0	1	-6	9	-1
2022-06-24	242	1	3	213	13	12	35	0	0	28	5	2	1	0	0	1	0	0	3	0	0	3	0	0	1	0	0	1	0	0	3	0	0	3	0	0	-272	-1	-3
2022-06-25	321	2	8	283	21	7	30	0	0	27	2	1	0	0	0	0	0	0	0	0	0	0	0	0	0	0	0	0	0	0	0	0	0	0	0	0	79	-5	-4
2022-06-26	314	0	11	263	32	8	44	0	1	34	6	3	2	0	0	2	0	0	1	0	0	1	0	0	3	0	0	2	1	0	3	0	0	2	0	1	-7	14	6
2022-06-27	750	5	21	654	47	23	33	0	2	28	0	3	1	0	0	1	0	0	1	0	0	1	0	0	4	0	0	3	1	0	2	0	0	2	0	0	436	-11	0
2022-06-28	586	3	16	517	33	17	52	2	2	40	3	5	2	0	0	2	0	0	4	0	1	3	0	0	2	0	0	2	0	0	4	0	1	3	0	0	-164	19	0
2022-06-29	587	4	21	491	59	12	42	0	1	35	3	3	5	0	0	5	0	0	3	0	0	2	0	1	5	0	0	5	0	0	4	0	0	3	0	1	1	-10	3
2022-06-30	528	5	13	443	51	16	46	0	2	39	1	4	3	0	0	2	1	0	2	0	0	2	0	0	4	0	0	3	1	0	2	0	0	2	0	0	-59	4	-3
2022-07-01	511	3	16	436	38	18	24	0	3	18	1	2	1	0	0	1	0	0	0	0	0	0	0	0	2	0	0	2	0	0	1	0	0	1	0	0	-17	-22	-3
2022-07-02	274	2	6	231	28	7	35	1	0	31	1	2	0	0	0	0	0	0	1	0	0	1	0	0	0	0	0	0	0	0	2	0	0	1	0	1	-237	11	-1
2022-07-03	233	1	8	195	23	6	34	0	1	26	5	2	0	0	0	0	0	0	2	0	0	1	1	0	0	0	0	0	0	0	2	0	0	1	1	0	-41	-1	0
2022-07-04	725	1	18	576	107	23	43	0	0	37	3	3	5	0	1	4	0	0	1	0	0	0	0	1	7	0	1	6	0	0	1	0	0	0	0	1	492	9	6
2022-07-05	558	5	12	447	73	21	42	0	1	35	6	0	4	0	0	2	1	1	3	0	0	3	0	0	4	0	0	2	1	1	3	0	0	3	0	0	-167	-1	-1
2022-07-06	525	5	15	432	57	16	30	0	1	25	2	2	4	0	0	3	1	0	2	0	0	2	0	0	8	0	0	7	1	0	2	0	0	2	0	0	-33	-12	3
2022-07-07	418	5	7	344	47	15	43	1	1	35	5	1	1	0	0	1	0	0	3	1	0	2	0	0	3	0	0	3	0	0	3	1	0	2	0	0	-107	13	-4
2022-07-08	439	3	17	364	47	8	36	0	1	28	5	2	3	0	0	3	0	0	2	0	0	1	1	0	4	0	0	4	0	0	3	0	0	1	1	1	21	-7	1
2022-07-09	219	2	4	189	15	9	18	0	0	16	1	1	1	0	0	1	0	0	0	0	0	0	0	0	1	0	0	1	0	0	0	0	0	0	0	0	-220	-18	-6
2022-07-10	182	2	1	151	19	9	27	0	0	24	2	1	2	0	0	0	2	0	1	0	0	1	0	0	3	0	0	0	2	1	2	0	0	2	0	0	-37	9	4
2022-07-11	444	4	6	361	58	15	33	0	0	28	2	3	3	0	0	3	0	0	3	0	0	3	0	0	4	0	0	3	0	1	3	0	0	3	0	0	262	6	2
2022-07-12	353	6	8	291	38	10	27	1	1	22	2	1	1	0	0	0	0	1	1	0	0	1	0	0	1	0	0	0	0	1	2	0	0	2	0	0	-91	-6	-4
2022-07-13	348	0	10	283	46	9	32	0	1	27	3	1	0	0	0	0	0	0	1	0	0	1	0	0	1	0	0	1	0	0	1	0	0	1	0	0	-5	5	-1
2022-07-14	265	2	2	227	26	8	21	1	0	17	2	1	0	0	0	0	0	0	0	0	0	0	0	0	0	0	0	0	0	0	0	0	0	0	0	0	-83	-11	-2
2022-07-15	250	1	3	193	45	8	26	0	0	22	3	1	1	0	0	1	0	0	1	0	0	1	0	0	4	0	0	3	0	1	1	0	0	1	0	0	-15	5	5
2022-07-16	139	0	0	112	18	9	23	0	0	18	1	4	4	0	0	1	2	1	0	0	0	0	0	0	4	0	0	1	2	1	0	0	0	0	0	0	-111	-3	-1
2022-07-17	125	0	3	108	7	7	24	0	0	21	2	1	0	0	0	0	0	0	1	0	0	0	0	1	0	0	0	0	0	0	2	0	0	1	0	1	-14	1	-2
2022-07-18	298	3	3	247	39	6	38	1	0	34	2	1	2	0	0	2	0	0	2	0	0	2	0	0	3	0	0	3	0	0	2	0	0	2	0	0	173	14	3
2022-07-19	271	2	4	215	42	8	29	1	1	23	2	2	0	0	0	0	0	0	1	1	0	0	0	0	2	0	0	1	1	0	1	1	0	0	0	0	-27	-9	-2
2022-07-20	247	3	2	202	26	14	29	1	1	20	4	3	1	0	0	0	0	1	1	0	0	1	0	0	2	0	0	0	0	2	1	0	0	1	0	0	-24	0	0
2022-07-21	193	4	2	152	29	6	15	1	0	11	1	2	2	0	0	2	0	0	2	0	0	1	0	1	3	0	0	2	0	1	2	0	0	1	0	1	-54	-14	2
2022-07-22	224	0	2	167	50	5	26	0	0	21	3	2	1	0	0	0	1	0	4	0	0	3	0	1	1	0	0	0	1	0	4	0	0	3	0	1	31	11	0
2022-07-23	101	1	2	88	7	3	14	0	0	12	1	1	0	0	0	0	0	0	0	0	0	0	0	0	1	0	0	1	0	0	0	0	0	0	0	0	-123	-12	-4
2022-07-24	100	1	1	79	16	3	21	1	0	19	0	1	1	0	0	1	0	0	1	0	0	0	0	1	2	0	0	2	0	0	1	0	0	0	0	1	-1	7	2
2022-07-25	200	1	2	152	38	7	20	0	0	16	3	1	2	0	0	2	0	0	1	0	0	0	1	0	2	0	0	2	0	0	1	0	0	0	1	0	100	-1	0
2022-07-26	170	3	5	124	33	5	8	0	0	6	2	0	2	0	0	2	0	0	0	0	0	0	0	0	3	0	0	3	0	0	0	0	0	0	0	0	-30	-12	0
2022-07-27	196	0	1	135	56	4	19	0	0	15	3	1	1	0	0	1	0	0	0	0	0	0	0	0	2	0	0	2	0	0	0	0	0	0	0	0	26	11	-1
2022-07-28	121	0	1	93	24	3	8	0	0	7	1	0	0	0	0	0	0	0	1	0	0	1	0	0	0	0	0	0	0	0	1	0	0	1	0	0	-75	-11	-1
2022-07-29	148	0	1	108	31	8	15	0	0	13	2	0	0	0	0	0	0	0	0	0	0	0	0	0	1	0	0	1	0	0	0	0	0	0	0	0	27	7	0
2022-07-30	77	0	1	52	20	4	9	0	0	9	0	0	0	0	0	0	0	0	0	0	0	0	0	0	1	0	0	0	0	1	0	0	0	0	0	0	-71	-6	0
2022-07-31	63	0	2	43	13	5	4	0	1	2	0	1	0	0	0	0	0	0	0	0	0	0	0	0	2	0	0	1	0	1	0	0	0	0	0	0	-14	-5	1
2022-08-01	125	1	0	90	28	6	8	1	0	4	2	1	1	0	0	0	1	0	0	0	0	0	0	0	1	0	0	0	1	0	0	0	0	0	0	0	62	4	-1
2022-08-02	119	1	0	61	48	9	13	0	0	8	4	1	0	0	0	0	0	0	0	0	0	0	0	0	0	0	0	0	0	0	0	0	0	0	0	0	-6	5	-1
2022-08-03	106	2	1	64	34	5	10	0	0	5	5	0	1	0	0	0	0	1	2	0	0	1	1	0	1	0	0	0	0	1	2	0	0	1	1	0	-13	-3	3
2022-08-04	99	0	0	58	39	2	10	0	0	5	5	0	0	0	0	0	0	0	1	0	0	1	0	0	1	0	0	1	0	0	1	0	0	1	0	0	-7	0	-1
2022-08-05	92	1	0	51	38	2	16	1	0	7	8	0	1	0	0	1	0	0	1	1	0	0	0	0	3	0	0	3	0	0	2	1	0	0	1	0	-7	6	3
2022-08-06	55	0	0	28	27	0	4	0	0	1	3	0	0	0	0	0	0	0	0	0	0	0	0	0	0	0	0	0	0	0	0	0	0	0	0	0	-37	-12	-5
2022-08-07	43	0	0	22	18	3	7	0	0	5	1	1	1	0	0	0	1	0	1	0	0	0	0	1	2	0	0	1	1	0	1	0	0	0	0	1	-12	3	3
2022-08-08	124	0	0	65	51	8	8	0	0	5	3	0	0	0	0	0	0	0	0	0	0	0	0	0	1	0	0	1	0	0	0	0	0	0	0	0	81	1	-2
2022-08-09	88	0	0	28	54	6	8	0	0	2	6	0	0	0	0	0	0	0	0	0	0	0	0	0	1	0	0	1	0	0	0	0	0	0	0	0	-36	0	0
2022-08-10	68	0	1	34	30	3	6	0	1	3	2	0	0	0	0	0	0	0	0	0	0	0	0	0	0	0	0	0	0	0	0	0	0	0	0	0	-20	-2	-1
2022-08-11	79	0	1	36	39	3	4	0	0	0	4	0	0	0	0	0	0	0	1	0	0	0	1	0	0	0	0	0	0	0	1	0	0	0	1	0	11	-2	1
2022-08-12	65	0	3	25	32	5	5	0	0	3	2	0	0	0	0	0	0	0	0	0	0	0	0	0	0	0	0	0	0	0	0	0	0	0	0	0	-14	1	-1
2022-08-13	46	0	0	17	27	2	9	0	0	2	6	1	0	0	0	0	0	0	0	0	0	0	0	0	0	0	0	0	0	0	0	0	0	0	0	0	-19	4	0
2022-08-14	50	0	0	17	32	1	9	0	0	0	8	1	0	0	0	0	0	0	1	0	0	0	1	0	0	0	0	0	0	0	1	0	0	0	1	0	4	0	1
2022-08-15	37	1	0	15	20	1	8	0	0	3	5	0	1	0	0	0	1	0	1	0	0	0	1	0	1	0	0	0	1	0	1	0	0	0	1	0	-13	-1	1
2022-08-16	64	0	0	25	37	2	3	0	0	2	1	0	0	0	0	0	0	0	0	0	0	0	0	0	0	0	0	0	0	0	0	0	0	0	0	0	27	-5	-2
2022-08-17	67	0	0	22	44	1	5	0	0	1	4	0	0	0	0	0	0	0	0	0	0	0	0	0	0	0	0	0	0	0	0	0	0	0	0	0	3	2	0
2022-08-18	63	1	1	18	42	1	5	0	0	0	5	0	1	0	0	0	1	0	0	0	0	0	0	0	2	0	0	1	1	0	0	0	0	0	0	0	-4	0	2
2022-08-19	64	1	0	14	45	4	7	0	0	3	4	0	0	0	0	0	0	0	0	0	0	0	0	0	0	0	0	0	0	0	0	0	0	0	0	0	1	2	-2
2022-08-20	38	0	0	6	30	2	9	0	0	2	7	0	1	0	0	0	1	0	1	0	0	0	1	0	1	0	0	0	1	0	1	0	0	0	1	0	-26	2	2
2022-08-21	32	1	0	5	26	0	6	0	0	1	5	0	0	0	0	0	0	0	0	0	0	0	0	0	0	0	0	0	0	0	0	0	0	0	0	0	-6	-3	-2
2022-08-22	67	0	0	22	42	3	4	0	0	2	2	0	0	0	0	0	0	0	0	0	0	0	0	0	0	0	0	0	0	0	0	0	0	0	0	0	35	-2	0
2022-08-23	63	1	1	23	36	2	6	0	0	1	5	0	1	0	0	1	0	0	1	0	0	0	1	0	2	0	0	1	1	0	1	0	0	0	1	0	-4	2	3
2022-08-24	54	0	0	15	36	3	4	0	0	1	2	1	1	0	0	1	0	0	0	0	0	0	0	0	1	0	0	1	0	0	0	0	0	0	0	0	-9	-2	-2
2022-08-25	55	0	0	15	40	0	3	0	0	0	3	0	0	0	0	0	0	0	0	0	0	0	0	0	0	0	0	0	0	0	0	0	0	0	0	0	1	-1	-1
2022-08-26	66	0	0	17	47	2	4	0	0	0	4	0	0	0	0	0	0	0	0	0	0	0	0	0	1	0	0	1	0	0	0	0	0	0	0	0	11	1	1
2022-08-27	35	0	0	5	26	4	5	0	0	0	4	1	0	0	0	0	0	0	0	0	0	0	0	0	0	0	0	0	0	0	1	0	0	0	1	0	-31	1	0
2022-08-28	28	0	0	5	23	0	9	0	0	1	8	0	0	0	0	0	0	0	0	0	0	0	0	0	0	0	0	0	0	0	0	0	0	0	0	0	-7	4	-1
2022-08-29	60	0	0	6	53	1	6	0	0	3	3	0	0	0	0	0	0	0	0	0	0	0	0	0	1	0	0	0	1	0	0	0	0	0	0	0	32	-3	1
2022-08-30	57	2	1	12	41	1	5	0	0	2	3	0	1	1	0	0	0	0	1	0	0	0	1	0	1	1	0	0	0	0	2	0	0	1	1	0	-3	-1	2
2022-08-31	41	0	0	5	33	3	2	0	0	1	1	0	0	0	0	0	0	0	0	0	0	0	0	0	0	0	0	0	0	0	0	0	0	0	0	0	-16	-3	-3
2022-09-01	43	0	0	5	38	0	4	0	0	2	2	0	0	0	0	0	0	0	0	0	0	0	0	0	0	0	0	0	0	0	0	0	0	0	0	0	2	2	0
2022-09-02	65	0	1	15	47	2	3	0	0	1	2	0	0	0	0	0	0	0	0	0	0	0	0	0	0	0	0	0	0	0	0	0	0	0	0	0	22	-1	0
2022-09-03	30	0	1	6	20	3	4	0	0	1	3	0	0	0	0	0	0	0	0	0	0	0	0	0	0	0	0	0	0	0	0	0	0	0	0	0	-35	1	0
2022-09-04	28	0	0	5	22	1	4	0	0	1	3	0	0	0	0	0	0	0	0	0	0	0	0	0	0	0	0	0	0	0	0	0	0	0	0	0	-2	0	0
2022-09-05	46	1	0	8	34	3	4	0	0	1	3	0	0	0	0	0	0	0	0	0	0	0	0	0	1	0	0	0	0	1	1	0	0	1	0	0	18	0	2
2022-09-06	51	0	0	8	40	3	8	0	0	1	5	2	0	0	0	0	0	0	0	0	0	0	0	0	0	0	0	0	0	0	0	0	0	0	0	0	5	4	-2
2022-09-07	40	0	1	4	35	0	8	0	0	1	7	0	0	0	0	0	0	0	0	0	0	0	0	0	0	0	0	0	0	0	0	0	0	0	0	0	-11	0	0
2022-09-08	68	0	3	7	54	4	6	0	0	0	6	0	0	0	0	0	0	0	0	0	0	0	0	0	0	0	0	0	0	0	0	0	0	0	0	0	28	-2	0
2022-09-09	61	0	2	11	48	0	8	0	0	1	7	0	1	0	0	0	1	0	0	0	0	0	0	0	1	0	0	0	1	0	0	0	0	0	0	0	-7	2	1
2022-09-10	20	0	0	2	18	0	3	0	0	0	3	0	0	0	0	0	0	0	0	0	0	0	0	0	0	0	0	0	0	0	0	0	0	0	0	0	-41	-5	-1
2022-09-11	42	1	0	4	37	0	5	0	0	0	5	0	0	0	0	0	0	0	0	0	0	0	0	0	0	0	0	0	0	0	0	0	0	0	0	0	22	2	0
2022-09-12	78	1	0	5	69	3	4	0	0	1	3	0	1	0	0	0	1	0	0	0	0	0	0	0	1	0	0	0	1	0	0	0	0	0	0	0	36	-1	1
2022-09-13	52	0	0	3	48	1	7	0	0	1	6	0	0	0	0	0	0	0	0	0	0	0	0	0	2	0	0	0	2	0	0	0	0	0	0	0	-26	3	1
2022-09-14	52	0	0	1	50	1	4	0	0	1	3	0	0	0	0	0	0	0	0	0	0	0	0	0	0	0	0	0	0	0	0	0	0	0	0	0	0	-3	-2
2022-09-15	70	0	1	4	65	0	2	0	0	0	2	0	0	0	0	0	0	0	1	0	0	0	1	0	0	0	0	0	0	0	1	0	0	0	1	0	18	-2	1
2022-09-16	52	0	0	0	50	2	4	0	0	0	3	1	0	0	0	0	0	0	0	0	0	0	0	0	0	0	0	0	0	0	0	0	0	0	0	0	-18	2	-1
2022-09-17	35	0	0	0	33	2	1	0	0	0	1	0	1	0	0	0	1	0	0	0	0	0	0	0	1	0	0	0	1	0	0	0	0	0	0	0	-17	-3	1
2022-09-18	26	0	0	3	21	2	7	0	0	1	5	1	0	0	0	0	0	0	0	0	0	0	0	0	0	0	0	0	0	0	1	0	0	0	1	0	-9	6	0
2022-09-19	73	0	1	2	69	1	9	0	0	0	9	0	0	0	0	0	0	0	0	0	0	0	0	0	0	0	0	0	0	0	0	0	0	0	0	0	47	2	-1
2022-09-20	43	0	0	0	42	1	4	0	0	0	3	1	0	0	0	0	0	0	0	0	0	0	0	0	0	0	0	0	0	0	0	0	0	0	0	0	-30	-5	0
2022-09-21	48	0	0	1	45	2	4	0	0	0	4	0	0	0	0	0	0	0	0	0	0	0	0	0	1	0	0	0	1	0	0	0	0	0	0	0	5	0	1
2022-09-22	41	0	0	1	40	0	4	0	0	0	4	0	0	0	0	0	0	0	0	0	0	0	0	0	0	0	0	0	0	0	0	0	0	0	0	0	-7	0	-1
2022-09-23	44	0	0	1	42	1	5	0	0	0	5	0	2	0	0	0	1	1	1	0	0	0	1	0	2	0	0	0	1	1	1	0	0	0	1	0	3	1	3
2022-09-24	36	0	0	2	33	1	7	0	0	0	7	0	1	0	0	0	1	0	0	0	0	0	0	0	1	0	0	0	1	0	0	0	0	0	0	0	-8	2	-2
2022-09-25	35	1	0	2	31	1	4	0	0	1	2	1	1	0	0	0	1	0	0	0	0	0	0	0	1	0	0	0	1	0	0	0	0	0	0	0	-1	-3	0
2022-09-26	80	0	1	2	74	3	10	0	0	0	8	2	0	0	0	0	0	0	0	0	0	0	0	0	0	0	0	0	0	0	0	0	0	0	0	0	45	6	-1
2022-09-27	55	0	0	1	53	1	6	0	0	0	6	0	0	0	0	0	0	0	0	0	0	0	0	0	0	0	0	0	0	0	0	0	0	0	0	0	-25	-4	0
2022-09-28	58	0	0	3	53	2	2	0	0	0	2	0	0	0	0	0	0	0	0	0	0	0	0	0	0	0	0	0	0	0	0	0	0	0	0	0	3	-4	0
2022-09-29	55	2	0	0	50	3	9	0	0	0	8	1	0	0	0	0	0	0	1	0	0	0	1	0	0	0	0	0	0	0	2	0	0	0	2	0	-3	7	2
2022-09-30	56	0	0	3	51	2	4	0	0	0	4	0	0	0	0	0	0	0	0	0	0	0	0	0	0	0	0	0	0	0	0	0	0	0	0	0	1	-5	-2
2022-10-01	29	2	0	1	25	1	6	0	0	1	5	0	0	0	0	0	0	0	0	0	0	0	0	0	0	0	0	0	0	0	0	0	0	0	0	0	-27	2	0
2022-10-02	40	3	1	0	36	0	5	2	0	0	3	0	1	0	0	0	1	0	0	0	0	0	0	0	1	0	0	0	1	0	0	0	0	0	0	0	11	-1	1
2022-10-03	99	12	0	3	80	4	10	1	0	1	7	1	0	0	0	0	0	0	1	0	0	0	1	0	0	0	0	0	0	0	1	0	0	0	1	0	59	5	0
2022-10-04	76	4	1	0	70	1	12	1	0	0	11	0	0	0	0	0	0	0	0	0	0	0	0	0	0	0	0	0	0	0	0	0	0	0	0	0	-23	2	-1
2022-10-05	95	17	0	0	75	3	18	2	0	0	16	0	0	0	0	0	0	0	1	0	0	0	1	0	0	0	0	0	0	0	1	0	0	0	1	0	19	6	1
2022-10-06	44	4	0	0	40	0	4	0	0	0	4	0	0	0	0	0	0	0	0	0	0	0	0	0	0	0	0	0	0	0	0	0	0	0	0	0	-51	-14	-1
2022-10-07	77	8	1	1	66	1	6	1	1	0	4	0	0	0	0	0	0	0	1	0	0	0	1	0	0	0	0	0	0	0	1	0	0	0	1	0	33	2	1
2022-10-08	33	3	0	1	27	2	5	0	0	0	4	1	0	0	0	0	0	0	0	0	0	0	0	0	0	0	0	0	0	0	0	0	0	0	0	0	-44	-1	-1
2022-10-09	31	6	0	0	25	0	3	1	0	0	2	0	1	1	0	0	0	0	0	0	0	0	0	0	1	1	0	0	0	0	0	0	0	0	0	0	-2	-2	1
2022-10-10	104	9	1	1	88	5	9	1	0	0	8	0	1	0	0	0	1	0	0	0	0	0	0	0	2	0	0	0	2	0	0	0	0	0	0	0	73	6	1
2022-10-11	95	13	0	0	79	3	10	4	0	0	6	0	1	0	0	0	1	0	0	0	0	0	0	0	1	0	0	0	1	0	1	1	0	0	0	0	-9	1	0
2022-10-12	51	9	1	0	39	2	12	1	0	0	10	1	0	0	0	0	0	0	0	0	0	0	0	0	0	0	0	0	0	0	0	0	0	0	0	0	-44	2	-2
2022-10-13	83	11	0	1	70	1	12	1	0	0	11	0	1	0	0	0	1	0	0	0	0	0	0	0	2	0	0	0	2	0	0	0	0	0	0	0	32	0	2
2022-10-14	82	14	0	1	61	6	8	1	0	0	6	1	0	0	0	0	0	0	0	0	0	0	0	0	0	0	0	0	0	0	0	0	0	0	0	0	-1	-4	-2
2022-10-15	47	9	0	0	37	1	6	3	0	0	3	0	0	0	0	0	0	0	0	0	0	0	0	0	0	0	0	0	0	0	0	0	0	0	0	0	-35	-2	0
2022-10-16	32	6	0	1	23	2	5	0	0	0	4	1	0	0	0	0	0	0	1	0	0	0	1	0	0	0	0	0	0	0	1	0	0	0	1	0	-15	-1	1
2022-10-17	78	13	0	0	62	3	11	2	0	0	9	0	0	0	0	0	0	0	1	0	0	0	1	0	0	0	0	0	0	0	1	0	0	0	1	0	46	6	0
2022-10-18	88	10	0	1	74	3	8	1	0	0	7	0	0	0	0	0	0	0	0	0	0	0	0	0	0	0	0	0	0	0	0	0	0	0	0	0	10	-3	-1
2022-10-19	87	16	0	1	66	4	8	2	0	0	5	1	0	0	0	0	0	0	1	0	0	0	0	1	0	0	0	0	0	0	1	0	0	0	0	1	-1	0	1
2022-10-20	71	16	1	0	50	4	6	0	0	0	6	0	1	0	0	0	1	0	0	0	0	0	0	0	1	0	0	0	1	0	1	0	0	0	1	0	-16	-2	1
2022-10-21	80	18	2	1	56	3	8	1	1	0	6	0	1	0	0	0	1	0	0	0	0	0	0	0	1	0	0	0	1	0	0	0	0	0	0	0	9	2	-1
2022-10-22	35	5	1	1	24	4	6	1	0	0	5	0	0	0	0	0	0	0	0	0	0	0	0	0	0	0	0	0	0	0	0	0	0	0	0	0	-45	-2	-1
2022-10-23	35	6	1	0	23	5	5	0	0	0	4	1	0	0	0	0	0	0	0	0	0	0	0	0	0	0	0	0	0	0	0	0	0	0	0	0	0	-1	0
2022-10-24	80	22	0	2	55	1	8	3	0	0	5	0	0	0	0	0	0	0	1	1	0	0	0	0	0	0	0	0	0	0	1	1	0	0	0	0	45	3	1
2022-10-25	60	16	0	0	42	2	5	1	0	0	4	0	0	0	0	0	0	0	0	0	0	0	0	0	0	0	0	0	0	0	0	0	0	0	0	0	-20	-3	-1
2022-10-26	59	16	0	0	42	1	7	2	0	0	5	0	0	0	0	0	0	0	0	0	0	0	0	0	0	0	0	0	0	0	0	0	0	0	0	0	-1	2	0
2022-10-27	94	17	1	2	70	4	8	2	0	0	6	0	0	0	0	0	0	0	0	0	0	0	0	0	0	0	0	0	0	0	0	0	0	0	0	0	35	1	0
2022-10-28	82	18	0	0	60	4	6	1	0	0	4	1	0	0	0	0	0	0	0	0	0	0	0	0	0	0	0	0	0	0	0	0	0	0	0	0	-12	-2	0
2022-10-29	31	8	1	1	21	0	6	3	0	0	3	0	0	0	0	0	0	0	0	0	0	0	0	0	0	0	0	0	0	0	0	0	0	0	0	0	-51	0	0
2022-10-30	31	12	0	0	18	1	2	2	0	0	0	0	0	0	0	0	0	0	0	0	0	0	0	0	0	0	0	0	0	0	0	0	0	0	0	0	0	-4	0
2022-10-31	80	26	0	2	50	2	8	1	0	0	6	1	0	0	0	0	0	0	0	0	0	0	0	0	0	0	0	0	0	0	0	0	0	0	0	0	49	6	0
2022-11-01	42	12	0	0	29	1	7	1	0	0	6	0	0	0	0	0	0	0	0	0	0	0	0	0	0	0	0	0	0	0	0	0	0	0	0	0	-38	-1	0
2022-11-02	105	28	1	2	70	4	11	1	1	0	9	0	0	0	0	0	0	0	0	0	0	0	0	0	1	1	0	0	0	0	0	0	0	0	0	0	63	4	1
2022-11-03	92	29	0	1	56	6	11	2	0	1	6	2	0	0	0	0	0	0	0	0	0	0	0	0	0	0	0	0	0	0	0	0	0	0	0	0	-13	0	-1
2022-11-04	72	18	0	0	52	2	9	2	0	0	6	1	0	0	0	0	0	0	0	0	0	0	0	0	0	0	0	0	0	0	0	0	0	0	0	0	-20	-2	0
2022-11-05	46	13	0	1	26	6	8	0	0	1	7	0	0	0	0	0	0	0	0	0	0	0	0	0	0	0	0	0	0	0	1	0	0	0	1	0	-26	-1	1
2022-11-06	34	17	0	0	15	2	7	2	0	0	4	1	0	0	0	0	0	0	0	0	0	0	0	0	0	0	0	0	0	0	0	0	0	0	0	0	-12	-1	-1
2022-11-07	88	27	0	0	55	6	3	0	0	0	3	0	0	0	0	0	0	0	0	0	0	0	0	0	0	0	0	0	0	0	0	0	0	0	0	0	54	-4	0
2022-11-08	81	25	1	0	53	2	10	0	1	0	8	1	0	0	0	0	0	0	0	0	0	0	0	0	0	0	0	0	0	0	0	0	0	0	0	0	-7	7	0
2022-11-09	95	27	0	1	64	3	10	4	0	0	6	0	0	0	0	0	0	0	0	0	0	0	0	0	0	0	0	0	0	0	0	0	0	0	0	0	14	0	0
2022-11-10	99	33	3	0	60	3	11	3	0	0	8	0	0	0	0	0	0	0	0	0	0	0	0	0	0	0	0	0	0	0	0	0	0	0	0	0	4	1	0
2022-11-11	102	37	1	1	58	5	12	3	0	0	6	3	0	0	0	0	0	0	1	0	0	0	1	0	0	0	0	0	0	0	1	0	0	0	1	0	3	1	1
2022-11-12	55	16	0	0	36	3	8	2	0	0	5	1	0	0	0	0	0	0	0	0	0	0	0	0	0	0	0	0	0	0	0	0	0	0	0	0	-47	-4	-1
2022-11-13	51	16	1	0	33	1	9	3	0	0	6	0	0	0	0	0	0	0	1	1	0	0	0	0	0	0	0	0	0	0	1	1	0	0	0	0	-4	1	1
2022-11-14	149	38	1	0	102	8	18	6	0	0	9	3	0	0	0	0	0	0	0	0	0	0	0	0	0	0	0	0	0	0	0	0	0	0	0	0	98	9	-1
2022-11-15	110	39	1	1	64	5	9	4	0	0	3	2	0	0	0	0	0	0	0	0	0	0	0	0	0	0	0	0	0	0	0	0	0	0	0	0	-39	-9	0
2022-11-16	115	34	0	1	68	12	9	3	0	0	6	0	0	0	0	0	0	0	0	0	0	0	0	0	0	0	0	0	0	0	0	0	0	0	0	0	5	0	0
2022-11-17	109	41	1	0	61	6	13	4	0	0	7	2	0	0	0	0	0	0	0	0	0	0	0	0	0	0	0	0	0	0	0	0	0	0	0	0	-6	4	0
2022-11-18	106	40	1	0	61	4	14	6	0	0	8	0	0	0	0	0	0	0	0	0	0	0	0	0	0	0	0	0	0	0	0	0	0	0	0	0	-3	1	0
2022-11-19	55	21	1	1	31	1	10	3	0	1	5	1	0	0	0	0	0	0	0	0	0	0	0	0	0	0	0	0	0	0	0	0	0	0	0	0	-51	-4	0
2022-11-20	56	20	1	0	33	2	8	3	1	0	3	1	0	0	0	0	0	0	0	0	0	0	0	0	0	0	0	0	0	0	0	0	0	0	0	0	1	-2	0
2022-11-21	132	46	1	0	81	4	19	6	0	0	12	1	0	0	0	0	0	0	0	0	0	0	0	0	0	0	0	0	0	0	0	0	0	0	0	0	76	11	0
2022-11-22	118	43	1	0	71	3	9	1	0	0	8	0	0	0	0	0	0	0	0	0	0	0	0	0	0	0	0	0	0	0	0	0	0	0	0	0	-14	-10	0
2022-11-23	111	42	0	0	66	3	9	5	0	0	4	0	1	1	0	0	0	0	0	0	0	0	0	0	1	1	0	0	0	0	0	0	0	0	0	0	-7	0	1
2022-11-24	119	45	2	0	65	7	8	1	1	0	6	0	0	0	0	0	0	0	0	0	0	0	0	0	1	0	0	0	1	0	0	0	0	0	0	0	8	-1	0
2022-11-25	121	55	0	0	58	8	14	9	0	0	5	0	0	0	0	0	0	0	0	0	0	0	0	0	0	0	0	0	0	0	0	0	0	0	0	0	2	6	-1
2022-11-26	53	20	1	0	30	2	10	3	0	0	5	2	0	0	0	0	0	0	0	0	0	0	0	0	0	0	0	0	0	0	0	0	0	0	0	0	-68	-4	0
2022-11-27	48	26	0	0	22	0	5	2	0	0	3	0	0	0	0	0	0	0	0	0	0	0	0	0	0	0	0	0	0	0	0	0	0	0	0	0	-5	-5	0
2022-11-28	144	57	2	2	77	6	20	10	0	0	9	1	0	0	0	0	0	0	0	0	0	0	0	0	0	0	0	0	0	0	0	0	0	0	0	0	96	15	0
2022-11-29	137	46	0	0	81	10	17	3	0	0	10	4	0	0	0	0	0	0	1	0	0	0	1	0	0	0	0	0	0	0	1	0	0	0	1	0	-7	-3	1
2022-11-30	123	54	0	0	62	7	15	7	0	0	7	1	0	0	0	0	0	0	0	0	0	0	0	0	0	0	0	0	0	0	0	0	0	0	0	0	-14	-2	-1
2022-12-01	124	56	0	1	63	4	15	6	0	0	8	1	0	0	0	0	0	0	0	0	0	0	0	0	0	0	0	0	0	0	0	0	0	0	0	0	1	0	0
2022-12-02	125	41	0	2	77	5	24	8	0	1	14	1	0	0	0	0	0	0	1	0	0	0	1	0	0	0	0	0	0	0	1	0	0	0	1	0	1	9	1
2022-12-03	47	21	0	2	22	2	13	5	0	0	7	1	0	0	0	0	0	0	0	0	0	0	0	0	0	0	0	0	0	0	0	0	0	0	0	0	-78	-11	-1
2022-12-04	63	23	1	0	39	0	14	4	0	0	10	0	0	0	0	0	0	0	0	0	0	0	0	0	0	0	0	0	0	0	0	0	0	0	0	0	16	1	0
2022-12-05	158	65	0	0	86	7	27	9	0	0	17	1	0	0	0	0	0	0	0	0	0	0	0	0	0	0	0	0	0	0	0	0	0	0	0	0	95	13	0
2022-12-06	63	31	0	0	32	0	13	6	0	0	7	0	0	0	0	0	0	0	0	0	0	0	0	0	0	0	0	0	0	0	0	0	0	0	0	0	-95	-14	0
2022-12-07	151	59	1	0	84	7	18	3	0	0	12	3	0	0	0	0	0	0	0	0	0	0	0	0	0	0	0	0	0	0	0	0	0	0	0	0	88	5	0
2022-12-08	59	31	1	0	27	0	9	9	0	0	0	0	0	0	0	0	0	0	0	0	0	0	0	0	0	0	0	0	0	0	0	0	0	0	0	0	-92	-9	0
2022-12-09	124	57	1	1	56	9	25	8	1	0	13	3	1	0	0	0	1	0	0	0	0	0	0	0	1	0	0	0	1	0	0	0	0	0	0	0	65	16	1
2022-12-10	75	28	1	0	45	1	17	7	0	0	10	0	0	0	0	0	0	0	0	0	0	0	0	0	0	0	0	0	0	0	0	0	0	0	0	0	-49	-8	-1
2022-12-11	56	17	1	0	35	3	11	0	0	0	11	0	0	0	0	0	0	0	0	0	0	0	0	0	0	0	0	0	0	0	0	0	0	0	0	0	-19	-6	0
2022-12-12	115	40	2	1	62	10	15	6	0	0	7	2	0	0	0	0	0	0	0	0	0	0	0	0	0	0	0	0	0	0	0	0	0	0	0	0	59	4	0
2022-12-13	99	42	1	1	52	3	13	5	0	0	7	1	0	0	0	0	0	0	0	0	0	0	0	0	0	0	0	0	0	0	0	0	0	0	0	0	-16	-2	0
2022-12-14	105	33	3	1	65	3	3	0	0	0	3	0	0	0	0	0	0	0	0	0	0	0	0	0	0	0	0	0	0	0	0	0	0	0	0	0	6	-10	0
2022-12-15	96	45	1	1	43	6	14	6	1	0	6	1	0	0	0	0	0	0	0	0	0	0	0	0	0	0	0	0	0	0	0	0	0	0	0	0	-9	11	0
2022-12-16	81	32	2	1	40	6	16	9	0	0	5	2	0	0	0	0	0	0	0	0	0	0	0	0	0	0	0	0	0	0	0	0	0	0	0	0	-15	2	0
2022-12-17	30	9	0	0	20	1	4	0	0	0	3	1	0	0	0	0	0	0	0	0	0	0	0	0	0	0	0	0	0	0	0	0	0	0	0	0	-51	-12	0
2022-12-18	27	11	0	0	13	3	4	2	0	0	2	0	0	0	0	0	0	0	0	0	0	0	0	0	0	0	0	0	0	0	0	0	0	0	0	0	-3	0	0
2022-12-19	98	39	0	2	51	6	17	6	0	0	9	2	0	0	0	0	0	0	0	0	0	0	0	0	0	0	0	0	0	0	0	0	0	0	0	0	71	13	0
2022-12-20	74	30	0	1	37	6	14	4	0	0	6	4	0	0	0	0	0	0	0	0	0	0	0	0	0	0	0	0	0	0	0	0	0	0	0	0	-24	-3	0
2022-12-21	64	21	1	1	36	5	10	2	1	0	5	2	0	0	0	0	0	0	0	0	0	0	0	0	0	0	0	0	0	0	0	0	0	0	0	0	-10	-4	0
2022-12-22	55	25	0	1	27	2	15	6	0	1	7	1	0	0	0	0	0	0	0	0	0	0	0	0	0	0	0	0	0	0	0	0	0	0	0	0	-9	5	0
2022-12-23	55	24	0	2	27	2	11	6	0	0	4	1	0	0	0	0	0	0	0	0	0	0	0	0	0	0	0	0	0	0	0	0	0	0	0	0	0	-4	0
2022-12-24	36	10	0	0	23	3	7	3	0	0	3	1	0	0	0	0	0	0	0	0	0	0	0	0	0	0	0	0	0	0	0	0	0	0	0	0	-19	-4	0
2022-12-25	40	20	1	0	18	1	21	12	0	0	9	0	0	0	0	0	0	0	0	0	0	0	0	0	0	0	0	0	0	0	0	0	0	0	0	0	4	14	0
2022-12-26	29	12	1	0	14	2	6	2	0	0	3	1	0	0	0	0	0	0	0	0	0	0	0	0	0	0	0	0	0	0	0	0	0	0	0	0	-11	-15	0
2022-12-27	63	24	1	1	32	5	7	1	0	1	4	1	0	0	0	0	0	0	0	0	0	0	0	0	0	0	0	0	0	0	0	0	0	0	0	0	34	1	0
2022-12-28	80	37	4	0	36	3	14	6	0	0	7	1	0	0	0	0	0	0	0	0	0	0	0	0	0	0	0	0	0	0	0	0	0	0	0	0	17	7	0
2022-12-29	57	19	3	1	33	1	12	3	0	0	9	0	0	0	0	0	0	0	0	0	0	0	0	0	0	0	0	0	0	0	0	0	0	0	0	0	-23	-2	0
2022-12-30	65	20	3	1	39	2	10	2	0	0	8	0	0	0	0	0	0	0	0	0	0	0	0	0	0	0	0	0	0	0	0	0	0	0	0	0	8	-2	0
2022-12-31	26	11	3	0	12	0	6	1	0	0	5	0	0	0	0	0	0	0	0	0	0	0	0	0	0	0	0	0	0	0	0	0	0	0	0	0	-39	-4	0
2023-01-01	17	6	2	0	9	0	5	2	0	0	3	0	0	0	0	0	0	0	0	0	0	0	0	0	0	0	0	0	0	0	0	0	0	0	0	0	-9	-1	0
2023-01-02	47	16	2	1	23	5	16	6	0	1	7	2	0	0	0	0	0	0	0	0	0	0	0	0	0	0	0	0	0	0	0	0	0	0	0	0	30	11	0
2023-01-03	49	13	6	0	28	2	17	6	1	0	10	0	0	0	0	0	0	0	0	0	0	0	0	0	0	0	0	0	0	0	0	0	0	0	0	0	2	1	0
2023-01-04	35	10	3	0	22	0	13	4	2	0	7	0	0	0	0	0	0	0	0	0	0	0	0	0	0	0	0	0	0	0	0	0	0	0	0	0	-14	-4	0
2023-01-05	48	13	5	1	27	2	11	4	0	0	5	2	0	0	0	0	0	0	0	0	0	0	0	0	0	0	0	0	0	0	0	0	0	0	0	0	13	-2	0
2023-01-06	23	4	4	0	13	2	11	2	2	0	6	1	0	0	0	0	0	0	0	0	0	0	0	0	0	0	0	0	0	0	0	0	0	0	0	0	-25	0	0
2023-01-07	32	7	5	0	18	2	9	3	1	0	4	1	0	0	0	0	0	0	0	0	0	0	0	0	0	0	0	0	0	0	0	0	0	0	0	0	9	-2	0
2023-01-08	22	7	2	2	10	1	9	4	1	1	3	0	0	0	0	0	0	0	0	0	0	0	0	0	0	0	0	0	0	0	0	0	0	0	0	0	-10	0	0
2023-01-09	68	11	14	1	40	2	16	2	4	1	9	0	0	0	0	0	0	0	0	0	0	0	0	0	0	0	0	0	0	0	0	0	0	0	0	0	46	7	0
2023-01-10	33	9	2	0	20	2	9	4	1	0	4	0	0	0	0	0	0	0	0	0	0	0	0	0	0	0	0	0	0	0	0	0	0	0	0	0	-35	-7	0
2023-01-11	36	6	8	0	21	1	6	0	2	0	4	0	0	0	0	0	0	0	0	0	0	0	0	0	0	0	0	0	0	0	0	0	0	0	0	0	3	-3	0
2023-01-12	30	7	7	0	14	2	6	1	3	0	2	0	0	0	0	0	0	0	0	0	0	0	0	0	0	0	0	0	0	0	0	0	0	0	0	0	-6	0	0
2023-01-13	28	3	9	0	15	1	4	0	3	0	0	1	0	0	0	0	0	0	0	0	0	0	0	0	0	0	0	0	0	0	0	0	0	0	0	0	-2	-2	0
2023-01-14	22	2	6	0	12	2	12	1	2	0	8	1	0	0	0	0	0	0	0	0	0	0	0	0	0	0	0	0	0	0	0	0	0	0	0	0	-6	8	0
2023-01-15	16	1	0	1	14	0	6	0	0	0	6	0	0	0	0	0	0	0	0	0	0	0	0	0	0	0	0	0	0	0	0	0	0	0	0	0	-6	-6	0
2023-01-16	33	5	8	1	18	1	9	0	1	0	7	1	0	0	0	0	0	0	0	0	0	0	0	0	0	0	0	0	0	0	0	0	0	0	0	0	17	3	0
2023-01-17	27	4	8	0	12	3	5	2	0	0	2	1	0	0	0	0	0	0	0	0	0	0	0	0	0	0	0	0	0	0	0	0	0	0	0	0	-6	-4	0
2023-01-18	36	7	13	0	14	2	13	4	5	0	4	0	0	0	0	0	0	0	0	0	0	0	0	0	0	0	0	0	0	0	0	0	0	0	0	0	9	8	0
2023-01-19	22	3	7	0	11	1	7	0	4	0	3	0	0	0	0	0	0	0	0	0	0	0	0	0	0	0	0	0	0	0	0	0	0	0	0	0	-14	-6	0
2023-01-20	23	1	4	3	13	2	7	1	1	1	4	0	0	0	0	0	0	0	0	0	0	0	0	0	0	0	0	0	0	0	0	0	0	0	0	0	1	0	0
2023-01-21	15	3	7	0	4	1	5	2	2	0	1	0	0	0	0	0	0	0	0	0	0	0	0	0	0	0	0	0	0	0	0	0	0	0	0	0	-8	-2	0
2023-01-22	15	2	2	0	9	2	5	0	1	0	3	1	0	0	0	0	0	0	0	0	0	0	0	0	0	0	0	0	0	0	0	0	0	0	0	0	0	0	0
2023-01-23	19	2	9	1	7	0	2	1	1	0	0	0	0	0	0	0	0	0	0	0	0	0	0	0	0	0	0	0	0	0	0	0	0	0	0	0	4	-3	0
2023-01-24	28	1	7	0	17	3	7	0	1	0	4	2	0	0	0	0	0	0	0	0	0	0	0	0	0	0	0	0	0	0	0	0	0	0	0	0	9	5	0
2023-01-25	17	3	4	0	8	2	5	1	1	0	2	1	0	0	0	0	0	0	0	0	0	0	0	0	0	0	0	0	0	0	0	0	0	0	0	0	-11	-2	0
2023-01-26	18	4	6	1	5	2	0	0	0	0	0	0	0	0	0	0	0	0	0	0	0	0	0	0	0	0	0	0	0	0	0	0	0	0	0	0	1	-5	0
[truncated: 22 more columns]

## Sheet: S6_Average_daily_metrics
	Average Cases / day			Average Hospitalizations/day			Average Deaths / day (due to COVID-19)			Average Deaths / day (due to + with COVID-19)
	60-69	70-79	≥80	60-69	70-79	≥80	60-69	70-79	≥80	60-69	70-79	≥80
BA.1 emergence	192.1	117.4	70.8	4.5	4.3	5.9	0.15	0.33	1.37	0.30	0.48	1.81
BA.1 dominance	287.3	282.0	198.4	4.1	8.2	16.0	0.14	0.77	2.97	0.23	1.14	3.83
BA.2 emergence	203.4	171.2	107.5	2.7	5.3	9.5	0.12	0.26	0.84	0.18	0.41	1.32
BA.2 dominance	201.8	217.6	143.5	2.6	5.2	9.2	0.00	0.20	0.77	0.17	0.35	1.31
BA.5 emergence	277.4	321.2	276.6	5.1	12.0	22.4	0.12	0.28	2.00	0.26	0.53	3.01
BA.5 dominance	46.1	53.7	56.4	1.7	3.1	5.9	0.04	0.09	0.53	0.05	0.20	0.87
BQ.1 emergence	77.4	92.6	79.9	3.3	6.7	9.9	0.03	0.08	0.28	0.05	0.09	0.39
BQ.1 dominance	31.9	37.7	45.5	3.2	5.9	9.6	0.00	0.00	0.00	0.02	0.04	0.00
